# Supplementary material for: Electrical characteristics of the extracellular fluid in the body segments of Apis mellifera bees
Source: PeerJ. 2025 Jul 17;13:e19691. doi: 10.7717/peerj.19691 (PMC12276733; doi:10.7717/peerj.19691)
Supplement: Supplemental Information 1 [file peerj-13-19691-s001.xlsx]

## Sheet: Exp_1_Resistance
rep	well	Body	Vout	t
1	1	Head	0.747051	0.005
1	1	Head	0.726664	0.01
1	1	Head	0.738091	0.015
1	1	Head	0.740117	0.02
1	1	Head	0.728679	0.025
1	1	Head	0.732541	0.03
1	1	Head	0.732566	0.035
1	1	Head	0.732578	0.04
1	1	Head	0.730641	0.045
1	1	Head	0.735333	0.05
1	1	Head	0.735107	0.055
1	1	Head	0.743288	0.06
1	1	Head	0.726356	0.065
1	1	Head	0.732914	0.07
1	1	Head	0.736073	0.075
1	1	Head	0.73833	0.08
1	1	Head	0.730559	0.085
1	1	Head	0.731147	0.09
1	1	Head	0.739065	0.095
1	1	Head	0.736563	0.1
1	1	Head	0.736158	0.105
1	1	Head	0.738333	0.11
1	1	Head	0.731975	0.115
1	1	Head	0.742754	0.12
1	1	Head	0.741326	0.125
1	1	Head	0.739379	0.13
1	1	Head	0.732061	0.135
1	1	Head	0.738135	0.14
1	1	Head	0.734978	0.145
1	1	Head	0.737828	0.15
1	1	Head	0.73697	0.155
1	1	Head	0.736266	0.16
1	1	Head	0.732962	0.165
1	1	Head	0.742547	0.17
1	1	Head	0.732923	0.175
1	1	Head	0.73208	0.18
1	1	Head	0.742987	0.185
1	1	Head	0.737372	0.19
1	1	Head	0.733301	0.195
1	1	Head	0.729745	0.2
1	1	Head	0.731873	0.205
1	1	Head	0.742001	0.21
1	1	Head	0.731246	0.215
1	1	Head	0.747923	0.22
1	1	Head	0.733062	0.225
1	1	Head	0.731649	0.23
1	1	Head	0.74478	0.235
1	1	Head	0.739512	0.24
1	1	Head	0.733152	0.245
1	1	Head	0.742697	0.25
1	1	Head	0.739246	0.255
1	1	Head	0.744523	0.26
1	1	Head	0.736962	0.265
1	1	Head	0.741609	0.27
1	1	Head	0.738866	0.275
1	1	Head	0.739087	0.28
1	1	Head	0.734951	0.285
1	1	Head	0.737787	0.29
1	1	Head	0.739216	0.295
1	1	Head	0.732368	0.3
1	1	Head	0.734654	0.305
1	1	Head	0.736885	0.31
1	1	Head	0.734664	0.315
1	1	Head	0.743111	0.32
1	1	Head	0.739496	0.325
1	1	Head	0.740349	0.33
1	1	Head	0.734297	0.335
1	1	Head	0.737258	0.34
1	1	Head	0.736881	0.345
1	1	Head	0.740669	0.35
1	1	Head	0.735001	0.355
1	1	Head	0.739574	0.36
1	1	Head	0.734842	0.365
1	1	Head	0.737097	0.37
1	1	Head	0.740626	0.375
1	1	Head	0.739602	0.38
1	1	Head	0.738437	0.385
1	1	Head	0.735948	0.39
1	1	Head	0.74246	0.395
1	1	Head	0.740165	0.4
1	1	Head	0.735533	0.405
1	1	Head	0.744894	0.41
1	1	Head	0.736206	0.415
1	1	Head	0.746559	0.42
1	1	Head	0.745578	0.425
1	1	Head	0.738162	0.43
1	1	Head	0.742359	0.435
1	1	Head	0.74497	0.44
1	1	Head	0.742645	0.445
1	1	Head	0.739469	0.45
1	1	Head	0.733542	0.455
1	1	Head	0.731885	0.46
1	1	Head	0.740021	0.465
1	1	Head	0.738801	0.47
1	1	Head	0.736593	0.475
1	1	Head	0.742872	0.48
1	1	Head	0.742605	0.485
1	1	Head	0.741925	0.49
1	1	Head	0.742183	0.495
1	1	Head	0.74003	0.5
1	1	Head	0.737966	0.505
1	1	Head	0.741	0.51
1	1	Head	0.745043	0.515
1	1	Head	0.73899	0.52
1	1	Head	0.741218	0.525
1	1	Head	0.742199	0.53
1	1	Head	0.736454	0.535
1	1	Head	0.744764	0.54
1	1	Head	0.739645	0.545
1	1	Head	0.74456	0.55
1	1	Head	0.740848	0.555
1	1	Head	0.743379	0.56
1	1	Head	0.737856	0.565
1	1	Head	0.739033	0.57
1	1	Head	0.74141	0.575
1	1	Head	0.739785	0.58
1	1	Head	0.737184	0.585
1	1	Head	0.736666	0.59
1	1	Head	0.74455	0.595
1	1	Head	0.742096	0.6
1	1	Head	0.740852	0.605
1	1	Head	0.738758	0.61
1	1	Head	0.740249	0.615
1	1	Head	0.736031	0.62
1	1	Head	0.744035	0.625
1	1	Head	0.741485	0.63
1	1	Head	0.748917	0.635
1	1	Head	0.751089	0.64
1	1	Head	0.745951	0.645
1	1	Head	0.744619	0.65
1	1	Head	0.733714	0.655
1	1	Head	0.742283	0.66
1	1	Head	0.745598	0.665
1	1	Head	0.736698	0.67
1	1	Head	0.740032	0.675
1	1	Head	0.742794	0.68
1	1	Head	0.742403	0.685
1	1	Head	0.735347	0.69
1	1	Head	0.733695	0.695
1	1	Head	0.739004	0.7
1	1	Head	0.738267	0.705
1	1	Head	0.733188	0.71
1	1	Head	0.747795	0.715
1	1	Head	0.741198	0.72
1	1	Head	0.745882	0.725
1	1	Head	0.737557	0.73
1	1	Head	0.739641	0.735
1	1	Head	0.738014	0.74
1	1	Head	0.742726	0.745
1	1	Head	0.751335	0.75
1	1	Head	0.733996	0.755
1	1	Head	0.740494	0.76
1	1	Head	0.743915	0.765
1	1	Head	0.741321	0.77
1	1	Head	0.744169	0.775
1	1	Head	0.741649	0.78
1	1	Head	0.7383	0.785
1	1	Head	0.737849	0.79
1	1	Head	0.742602	0.795
1	1	Head	0.738474	0.8
1	1	Head	0.737273	0.805
1	1	Head	0.741764	0.81
1	1	Head	0.742798	0.815
1	1	Head	0.742078	0.82
1	1	Head	0.744984	0.825
1	1	Head	0.74866	0.83
1	1	Head	0.740059	0.835
1	1	Head	0.742033	0.84
1	1	Head	0.741284	0.845
1	1	Head	0.741783	0.85
1	1	Head	0.737521	0.855
1	1	Head	0.741594	0.86
1	1	Head	0.747677	0.865
1	1	Head	0.737555	0.87
1	1	Head	0.732742	0.875
1	1	Head	0.741394	0.88
1	1	Head	0.738443	0.885
1	1	Head	0.740994	0.89
1	1	Head	0.736964	0.895
1	1	Head	0.746457	0.9
1	1	Head	0.737823	0.905
1	1	Head	0.737607	0.91
1	1	Head	0.747817	0.915
1	1	Head	0.739729	0.92
1	1	Head	0.745524	0.925
1	1	Head	0.744907	0.93
1	1	Head	0.740196	0.935
1	1	Head	0.746743	0.94
1	1	Head	0.748321	0.945
1	1	Head	0.736232	0.95
1	1	Head	0.746057	0.955
1	1	Head	0.735832	0.96
1	1	Head	0.739504	0.965
1	1	Head	0.742511	0.97
1	1	Head	0.740592	0.975
1	1	Head	0.748367	0.98
1	1	Head	0.744505	0.985
1	1	Head	0.741484	0.99
1	1	Head	0.74144	0.995
1	1	Head	0.745748	1
1	2	Head	0.618872	0.005
1	2	Head	0.601496	0.01
1	2	Head	0.606677	0.015
1	2	Head	0.611703	0.02
1	2	Head	0.617067	0.025
1	2	Head	0.623201	0.03
1	2	Head	0.617714	0.035
1	2	Head	0.612055	0.04
1	2	Head	0.612146	0.045
1	2	Head	0.615178	0.05
1	2	Head	0.628384	0.055
1	2	Head	0.610983	0.06
1	2	Head	0.626073	0.065
1	2	Head	0.614903	0.07
1	2	Head	0.612946	0.075
1	2	Head	0.623806	0.08
1	2	Head	0.616887	0.085
1	2	Head	0.621299	0.09
1	2	Head	0.623364	0.095
1	2	Head	0.629078	0.1
1	2	Head	0.621298	0.105
1	2	Head	0.620203	0.11
1	2	Head	0.618249	0.115
1	2	Head	0.630313	0.12
1	2	Head	0.619488	0.125
1	2	Head	0.624387	0.13
1	2	Head	0.63304	0.135
1	2	Head	0.623167	0.14
1	2	Head	0.619175	0.145
1	2	Head	0.614006	0.15
1	2	Head	0.619572	0.155
1	2	Head	0.626576	0.16
1	2	Head	0.621148	0.165
1	2	Head	0.627514	0.17
1	2	Head	0.621654	0.175
1	2	Head	0.629229	0.18
1	2	Head	0.624962	0.185
1	2	Head	0.630145	0.19
1	2	Head	0.632993	0.195
1	2	Head	0.620594	0.2
1	2	Head	0.627623	0.205
1	2	Head	0.627831	0.21
1	2	Head	0.620855	0.215
1	2	Head	0.62539	0.22
1	2	Head	0.62965	0.225
1	2	Head	0.627441	0.23
1	2	Head	0.622932	0.235
1	2	Head	0.631515	0.24
1	2	Head	0.625562	0.245
1	2	Head	0.639616	0.25
1	2	Head	0.630869	0.255
1	2	Head	0.632986	0.26
1	2	Head	0.636408	0.265
1	2	Head	0.630147	0.27
1	2	Head	0.62298	0.275
1	2	Head	0.627216	0.28
1	2	Head	0.623906	0.285
1	2	Head	0.633766	0.29
1	2	Head	0.622151	0.295
1	2	Head	0.640153	0.3
1	2	Head	0.626041	0.305
1	2	Head	0.625364	0.31
1	2	Head	0.637035	0.315
1	2	Head	0.631281	0.32
1	2	Head	0.633591	0.325
1	2	Head	0.622875	0.33
1	2	Head	0.631156	0.335
1	2	Head	0.636061	0.34
1	2	Head	0.629366	0.345
1	2	Head	0.634165	0.35
1	2	Head	0.628647	0.355
1	2	Head	0.630265	0.36
1	2	Head	0.627886	0.365
1	2	Head	0.625873	0.37
1	2	Head	0.639722	0.375
1	2	Head	0.629665	0.38
1	2	Head	0.642524	0.385
1	2	Head	0.639366	0.39
1	2	Head	0.640246	0.395
1	2	Head	0.636113	0.4
1	2	Head	0.634248	0.405
1	2	Head	0.633752	0.41
1	2	Head	0.631508	0.415
1	2	Head	0.637844	0.42
1	2	Head	0.626833	0.425
1	2	Head	0.635974	0.43
1	2	Head	0.638439	0.435
1	2	Head	0.644645	0.44
1	2	Head	0.639774	0.445
1	2	Head	0.630854	0.45
1	2	Head	0.638274	0.455
1	2	Head	0.645816	0.46
1	2	Head	0.632626	0.465
1	2	Head	0.63767	0.47
1	2	Head	0.636318	0.475
1	2	Head	0.631908	0.48
1	2	Head	0.639281	0.485
1	2	Head	0.639526	0.49
1	2	Head	0.630557	0.495
1	2	Head	0.636195	0.5
1	2	Head	0.637549	0.505
1	2	Head	0.635973	0.51
1	2	Head	0.639229	0.515
1	2	Head	0.635526	0.52
1	2	Head	0.638136	0.525
1	2	Head	0.630264	0.53
1	2	Head	0.634583	0.535
1	2	Head	0.644174	0.54
1	2	Head	0.634119	0.545
1	2	Head	0.644907	0.55
1	2	Head	0.64336	0.555
1	2	Head	0.636058	0.56
1	2	Head	0.636114	0.565
1	2	Head	0.639831	0.57
1	2	Head	0.636754	0.575
1	2	Head	0.643495	0.58
1	2	Head	0.636721	0.585
1	2	Head	0.632307	0.59
1	2	Head	0.642419	0.595
1	2	Head	0.64841	0.6
1	2	Head	0.63952	0.605
1	2	Head	0.630485	0.61
1	2	Head	0.645016	0.615
1	2	Head	0.6383	0.62
1	2	Head	0.641764	0.625
1	2	Head	0.638535	0.63
1	2	Head	0.637378	0.635
1	2	Head	0.638796	0.64
1	2	Head	0.650518	0.645
1	2	Head	0.641241	0.65
1	2	Head	0.643772	0.655
1	2	Head	0.635084	0.66
1	2	Head	0.641218	0.665
1	2	Head	0.6324	0.67
1	2	Head	0.643312	0.675
1	2	Head	0.636399	0.68
1	2	Head	0.634382	0.685
1	2	Head	0.637153	0.69
1	2	Head	0.640481	0.695
1	2	Head	0.636023	0.7
1	2	Head	0.643766	0.705
1	2	Head	0.631803	0.71
1	2	Head	0.642461	0.715
1	2	Head	0.636713	0.72
1	2	Head	0.640721	0.725
1	2	Head	0.640894	0.73
1	2	Head	0.642845	0.735
1	2	Head	0.646335	0.74
1	2	Head	0.640498	0.745
1	2	Head	0.637967	0.75
1	2	Head	0.639783	0.755
1	2	Head	0.644505	0.76
1	2	Head	0.632991	0.765
1	2	Head	0.646445	0.77
1	2	Head	0.639426	0.775
1	2	Head	0.634043	0.78
1	2	Head	0.644159	0.785
1	2	Head	0.641934	0.79
1	2	Head	0.648825	0.795
1	2	Head	0.644017	0.8
1	2	Head	0.639785	0.805
1	2	Head	0.637001	0.81
1	2	Head	0.627634	0.815
1	2	Head	0.644965	0.82
1	2	Head	0.650718	0.825
1	2	Head	0.64182	0.83
1	2	Head	0.645129	0.835
1	2	Head	0.631777	0.84
1	2	Head	0.646179	0.845
1	2	Head	0.639733	0.85
1	2	Head	0.646361	0.855
1	2	Head	0.649771	0.86
1	2	Head	0.641539	0.865
1	2	Head	0.641848	0.87
1	2	Head	0.646485	0.875
1	2	Head	0.631369	0.88
1	2	Head	0.64172	0.885
1	2	Head	0.636964	0.89
1	2	Head	0.646476	0.895
1	2	Head	0.641005	0.9
1	2	Head	0.639385	0.905
1	2	Head	0.64366	0.91
1	2	Head	0.639531	0.915
1	2	Head	0.646848	0.92
1	2	Head	0.637119	0.925
1	2	Head	0.638057	0.93
1	2	Head	0.636172	0.935
1	2	Head	0.64649	0.94
1	2	Head	0.644326	0.945
1	2	Head	0.64475	0.95
1	2	Head	0.649572	0.955
1	2	Head	0.63781	0.96
1	2	Head	0.643228	0.965
1	2	Head	0.645234	0.97
1	2	Head	0.640115	0.975
1	2	Head	0.644316	0.98
1	2	Head	0.650575	0.985
1	2	Head	0.63655	0.99
1	2	Head	0.642386	0.995
1	2	Head	0.650822	1
1	3	Head	0.523519	0.005
1	3	Head	0.535262	0.01
1	3	Head	0.524409	0.015
1	3	Head	0.538591	0.02
1	3	Head	0.545341	0.025
1	3	Head	0.538137	0.03
1	3	Head	0.535995	0.035
1	3	Head	0.534975	0.04
1	3	Head	0.534472	0.045
1	3	Head	0.535217	0.05
1	3	Head	0.531039	0.055
1	3	Head	0.541216	0.06
1	3	Head	0.54928	0.065
1	3	Head	0.537592	0.07
1	3	Head	0.541583	0.075
1	3	Head	0.550636	0.08
1	3	Head	0.535753	0.085
1	3	Head	0.54143	0.09
1	3	Head	0.545382	0.095
1	3	Head	0.54398	0.1
1	3	Head	0.541621	0.105
1	3	Head	0.558521	0.11
1	3	Head	0.538963	0.115
1	3	Head	0.540351	0.12
1	3	Head	0.551025	0.125
1	3	Head	0.54855	0.13
1	3	Head	0.556835	0.135
1	3	Head	0.554407	0.14
1	3	Head	0.544104	0.145
1	3	Head	0.554482	0.15
1	3	Head	0.557589	0.155
1	3	Head	0.541884	0.16
1	3	Head	0.544332	0.165
1	3	Head	0.561914	0.17
1	3	Head	0.550684	0.175
1	3	Head	0.54796	0.18
1	3	Head	0.551061	0.185
1	3	Head	0.543293	0.19
1	3	Head	0.559369	0.195
1	3	Head	0.540504	0.2
1	3	Head	0.552626	0.205
1	3	Head	0.541697	0.21
1	3	Head	0.551686	0.215
1	3	Head	0.556232	0.22
1	3	Head	0.560063	0.225
1	3	Head	0.552024	0.23
1	3	Head	0.557729	0.235
1	3	Head	0.551056	0.24
1	3	Head	0.557033	0.245
1	3	Head	0.550132	0.25
1	3	Head	0.555007	0.255
1	3	Head	0.545558	0.26
1	3	Head	0.542809	0.265
1	3	Head	0.541032	0.27
1	3	Head	0.551459	0.275
1	3	Head	0.562993	0.28
1	3	Head	0.559179	0.285
1	3	Head	0.557028	0.29
1	3	Head	0.55768	0.295
1	3	Head	0.554928	0.3
1	3	Head	0.562992	0.305
1	3	Head	0.561005	0.31
1	3	Head	0.560872	0.315
1	3	Head	0.560466	0.32
1	3	Head	0.556083	0.325
1	3	Head	0.559121	0.33
1	3	Head	0.562079	0.335
1	3	Head	0.557243	0.34
1	3	Head	0.561186	0.345
1	3	Head	0.557229	0.35
1	3	Head	0.561	0.355
1	3	Head	0.570076	0.36
1	3	Head	0.552303	0.365
1	3	Head	0.559699	0.37
1	3	Head	0.565092	0.375
1	3	Head	0.560601	0.38
1	3	Head	0.556195	0.385
1	3	Head	0.563147	0.39
1	3	Head	0.55848	0.395
1	3	Head	0.56004	0.4
1	3	Head	0.563475	0.405
1	3	Head	0.562643	0.41
1	3	Head	0.561095	0.415
1	3	Head	0.55735	0.42
1	3	Head	0.559804	0.425
1	3	Head	0.561248	0.43
1	3	Head	0.559965	0.435
1	3	Head	0.565686	0.44
1	3	Head	0.57357	0.445
1	3	Head	0.562416	0.45
1	3	Head	0.561334	0.455
1	3	Head	0.564653	0.46
1	3	Head	0.567375	0.465
1	3	Head	0.572553	0.47
1	3	Head	0.57191	0.475
1	3	Head	0.570737	0.48
1	3	Head	0.562981	0.485
1	3	Head	0.559102	0.49
1	3	Head	0.567158	0.495
1	3	Head	0.567403	0.5
1	3	Head	0.562778	0.505
1	3	Head	0.555522	0.51
1	3	Head	0.557079	0.515
1	3	Head	0.563858	0.52
1	3	Head	0.564429	0.525
1	3	Head	0.55632	0.53
1	3	Head	0.566261	0.535
1	3	Head	0.560278	0.54
1	3	Head	0.556362	0.545
1	3	Head	0.568836	0.55
1	3	Head	0.558778	0.555
1	3	Head	0.557234	0.56
1	3	Head	0.568153	0.565
1	3	Head	0.567381	0.57
1	3	Head	0.566585	0.575
1	3	Head	0.569417	0.58
1	3	Head	0.565698	0.585
1	3	Head	0.576867	0.59
1	3	Head	0.561958	0.595
1	3	Head	0.577075	0.6
1	3	Head	0.565942	0.605
1	3	Head	0.564018	0.61
1	3	Head	0.563232	0.615
1	3	Head	0.573239	0.62
1	3	Head	0.569975	0.625
1	3	Head	0.570319	0.63
1	3	Head	0.572783	0.635
1	3	Head	0.562643	0.64
1	3	Head	0.577484	0.645
1	3	Head	0.572868	0.65
1	3	Head	0.567241	0.655
1	3	Head	0.578897	0.66
1	3	Head	0.559247	0.665
1	3	Head	0.562846	0.67
1	3	Head	0.577308	0.675
1	3	Head	0.572411	0.68
1	3	Head	0.57715	0.685
1	3	Head	0.576869	0.69
1	3	Head	0.571403	0.695
1	3	Head	0.571908	0.7
1	3	Head	0.57364	0.705
1	3	Head	0.570377	0.71
1	3	Head	0.568928	0.715
1	3	Head	0.567441	0.72
1	3	Head	0.579197	0.725
1	3	Head	0.574845	0.73
1	3	Head	0.572063	0.735
1	3	Head	0.569425	0.74
1	3	Head	0.567521	0.745
1	3	Head	0.572323	0.75
1	3	Head	0.575681	0.755
1	3	Head	0.571446	0.76
1	3	Head	0.574118	0.765
1	3	Head	0.57292	0.77
1	3	Head	0.571371	0.775
1	3	Head	0.568996	0.78
1	3	Head	0.57305	0.785
1	3	Head	0.577354	0.79
1	3	Head	0.575589	0.795
1	3	Head	0.568999	0.8
1	3	Head	0.573898	0.805
1	3	Head	0.584266	0.81
1	3	Head	0.577565	0.815
1	3	Head	0.561638	0.82
1	3	Head	0.574946	0.825
1	3	Head	0.571942	0.83
1	3	Head	0.564696	0.835
1	3	Head	0.569339	0.84
1	3	Head	0.578708	0.845
1	3	Head	0.581411	0.85
1	3	Head	0.580234	0.855
1	3	Head	0.57443	0.86
1	3	Head	0.582942	0.865
1	3	Head	0.572587	0.87
1	3	Head	0.574587	0.875
1	3	Head	0.576289	0.88
1	3	Head	0.570341	0.885
1	3	Head	0.568129	0.89
1	3	Head	0.584059	0.895
1	3	Head	0.572389	0.9
1	3	Head	0.57853	0.905
1	3	Head	0.577455	0.91
1	3	Head	0.57333	0.915
1	3	Head	0.584397	0.92
1	3	Head	0.568035	0.925
1	3	Head	0.579636	0.93
1	3	Head	0.573938	0.935
1	3	Head	0.582026	0.94
1	3	Head	0.578532	0.945
1	3	Head	0.584489	0.95
1	3	Head	0.584047	0.955
1	3	Head	0.577086	0.96
1	3	Head	0.580178	0.965
1	3	Head	0.583925	0.97
1	3	Head	0.585267	0.975
1	3	Head	0.585038	0.98
1	3	Head	0.575459	0.985
1	3	Head	0.583021	0.99
1	3	Head	0.580249	0.995
1	3	Head	0.573717	1
2	1	Head	0.730692	0.005
2	1	Head	0.732635	0.01
2	1	Head	0.735794	0.015
2	1	Head	0.728887	0.02
2	1	Head	0.731339	0.025
2	1	Head	0.729865	0.03
2	1	Head	0.721678	0.035
2	1	Head	0.731727	0.04
2	1	Head	0.73519	0.045
2	1	Head	0.72947	0.05
2	1	Head	0.744553	0.055
2	1	Head	0.738919	0.06
2	1	Head	0.739267	0.065
2	1	Head	0.735903	0.07
2	1	Head	0.731398	0.075
2	1	Head	0.73976	0.08
2	1	Head	0.731662	0.085
2	1	Head	0.736236	0.09
2	1	Head	0.734881	0.095
2	1	Head	0.73923	0.1
2	1	Head	0.740287	0.105
2	1	Head	0.739427	0.11
2	1	Head	0.734011	0.115
2	1	Head	0.738546	0.12
2	1	Head	0.735127	0.125
2	1	Head	0.732796	0.13
2	1	Head	0.737667	0.135
2	1	Head	0.739437	0.14
2	1	Head	0.730176	0.145
2	1	Head	0.733511	0.15
2	1	Head	0.737217	0.155
2	1	Head	0.735317	0.16
2	1	Head	0.73083	0.165
2	1	Head	0.732953	0.17
2	1	Head	0.729108	0.175
2	1	Head	0.732675	0.18
2	1	Head	0.740427	0.185
2	1	Head	0.732168	0.19
2	1	Head	0.733177	0.195
2	1	Head	0.741775	0.2
2	1	Head	0.730671	0.205
2	1	Head	0.739287	0.21
2	1	Head	0.7323	0.215
2	1	Head	0.737031	0.22
2	1	Head	0.740878	0.225
2	1	Head	0.739353	0.23
2	1	Head	0.741758	0.235
2	1	Head	0.738255	0.24
2	1	Head	0.734193	0.245
2	1	Head	0.740608	0.25
2	1	Head	0.740522	0.255
2	1	Head	0.740817	0.26
2	1	Head	0.739179	0.265
2	1	Head	0.738098	0.27
2	1	Head	0.736381	0.275
2	1	Head	0.736566	0.28
2	1	Head	0.737176	0.285
2	1	Head	0.736086	0.29
2	1	Head	0.73677	0.295
2	1	Head	0.738164	0.3
2	1	Head	0.742765	0.305
2	1	Head	0.735953	0.31
2	1	Head	0.738455	0.315
2	1	Head	0.734071	0.32
2	1	Head	0.73767	0.325
2	1	Head	0.734076	0.33
2	1	Head	0.738031	0.335
2	1	Head	0.739025	0.34
2	1	Head	0.73749	0.345
2	1	Head	0.735685	0.35
2	1	Head	0.734739	0.355
2	1	Head	0.737052	0.36
2	1	Head	0.737298	0.365
2	1	Head	0.742247	0.37
2	1	Head	0.735531	0.375
2	1	Head	0.741023	0.38
2	1	Head	0.732292	0.385
2	1	Head	0.744202	0.39
2	1	Head	0.73709	0.395
2	1	Head	0.733713	0.4
2	1	Head	0.733992	0.405
2	1	Head	0.738906	0.41
2	1	Head	0.745379	0.415
2	1	Head	0.744787	0.42
2	1	Head	0.737627	0.425
2	1	Head	0.742983	0.43
2	1	Head	0.739871	0.435
2	1	Head	0.742119	0.44
2	1	Head	0.741438	0.445
2	1	Head	0.741997	0.45
2	1	Head	0.74414	0.455
2	1	Head	0.744987	0.46
2	1	Head	0.744826	0.465
2	1	Head	0.743674	0.47
2	1	Head	0.736521	0.475
2	1	Head	0.739422	0.48
2	1	Head	0.739319	0.485
2	1	Head	0.740598	0.49
2	1	Head	0.74266	0.495
2	1	Head	0.732789	0.5
2	1	Head	0.740921	0.505
2	1	Head	0.742519	0.51
2	1	Head	0.741619	0.515
2	1	Head	0.742367	0.52
2	1	Head	0.741731	0.525
2	1	Head	0.74692	0.53
2	1	Head	0.744427	0.535
2	1	Head	0.739154	0.54
2	1	Head	0.743039	0.545
2	1	Head	0.733301	0.55
2	1	Head	0.73657	0.555
2	1	Head	0.743812	0.56
2	1	Head	0.748269	0.565
2	1	Head	0.734568	0.57
2	1	Head	0.741324	0.575
2	1	Head	0.738337	0.58
2	1	Head	0.743756	0.585
2	1	Head	0.739984	0.59
2	1	Head	0.738831	0.595
2	1	Head	0.745815	0.6
2	1	Head	0.744264	0.605
2	1	Head	0.741983	0.61
2	1	Head	0.736607	0.615
2	1	Head	0.739699	0.62
2	1	Head	0.744586	0.625
2	1	Head	0.743554	0.63
2	1	Head	0.738576	0.635
2	1	Head	0.744551	0.64
2	1	Head	0.740236	0.645
2	1	Head	0.738651	0.65
2	1	Head	0.745941	0.655
2	1	Head	0.735082	0.66
2	1	Head	0.741548	0.665
2	1	Head	0.738581	0.67
2	1	Head	0.74039	0.675
2	1	Head	0.740076	0.68
2	1	Head	0.73874	0.685
2	1	Head	0.745598	0.69
2	1	Head	0.740123	0.695
2	1	Head	0.741963	0.7
2	1	Head	0.742471	0.705
2	1	Head	0.738605	0.71
2	1	Head	0.732741	0.715
2	1	Head	0.734584	0.72
2	1	Head	0.747999	0.725
2	1	Head	0.733593	0.73
2	1	Head	0.735104	0.735
2	1	Head	0.74595	0.74
2	1	Head	0.743107	0.745
2	1	Head	0.739632	0.75
2	1	Head	0.742078	0.755
2	1	Head	0.743441	0.76
2	1	Head	0.736888	0.765
2	1	Head	0.74363	0.77
2	1	Head	0.73905	0.775
2	1	Head	0.739581	0.78
2	1	Head	0.746091	0.785
2	1	Head	0.748682	0.79
2	1	Head	0.737868	0.795
2	1	Head	0.744398	0.8
2	1	Head	0.739264	0.805
2	1	Head	0.742202	0.81
2	1	Head	0.747338	0.815
2	1	Head	0.738573	0.82
2	1	Head	0.73713	0.825
2	1	Head	0.743473	0.83
2	1	Head	0.743861	0.835
2	1	Head	0.74036	0.84
2	1	Head	0.739273	0.845
2	1	Head	0.740755	0.85
2	1	Head	0.747273	0.855
2	1	Head	0.732845	0.86
2	1	Head	0.749416	0.865
2	1	Head	0.746812	0.87
2	1	Head	0.741427	0.875
2	1	Head	0.748794	0.88
2	1	Head	0.743997	0.885
2	1	Head	0.740826	0.89
2	1	Head	0.752489	0.895
2	1	Head	0.739138	0.9
2	1	Head	0.740802	0.905
2	1	Head	0.750044	0.91
2	1	Head	0.748023	0.915
2	1	Head	0.744859	0.92
2	1	Head	0.74125	0.925
2	1	Head	0.743535	0.93
2	1	Head	0.748405	0.935
2	1	Head	0.742651	0.94
2	1	Head	0.742588	0.945
2	1	Head	0.743609	0.95
2	1	Head	0.748574	0.955
2	1	Head	0.738104	0.96
2	1	Head	0.744181	0.965
2	1	Head	0.743726	0.97
2	1	Head	0.742326	0.975
2	1	Head	0.740934	0.98
2	1	Head	0.740706	0.985
2	1	Head	0.744942	0.99
2	1	Head	0.743075	0.995
2	1	Head	0.74433	1
2	2	Head	0.603536	0.005
2	2	Head	0.617778	0.01
2	2	Head	0.616263	0.015
2	2	Head	0.627203	0.02
2	2	Head	0.625907	0.025
2	2	Head	0.610346	0.03
2	2	Head	0.620138	0.035
2	2	Head	0.616549	0.04
2	2	Head	0.620461	0.045
2	2	Head	0.63285	0.05
2	2	Head	0.622017	0.055
2	2	Head	0.619888	0.06
2	2	Head	0.606415	0.065
2	2	Head	0.620542	0.07
2	2	Head	0.619816	0.075
2	2	Head	0.613981	0.08
2	2	Head	0.619786	0.085
2	2	Head	0.612484	0.09
2	2	Head	0.612837	0.095
2	2	Head	0.623787	0.1
2	2	Head	0.629782	0.105
2	2	Head	0.624214	0.11
2	2	Head	0.638866	0.115
2	2	Head	0.614677	0.12
2	2	Head	0.616824	0.125
2	2	Head	0.620261	0.13
2	2	Head	0.621405	0.135
2	2	Head	0.626826	0.14
2	2	Head	0.627645	0.145
2	2	Head	0.620814	0.15
2	2	Head	0.624524	0.155
2	2	Head	0.62966	0.16
2	2	Head	0.631003	0.165
2	2	Head	0.632321	0.17
2	2	Head	0.631083	0.175
2	2	Head	0.63148	0.18
2	2	Head	0.624218	0.185
2	2	Head	0.63261	0.19
2	2	Head	0.627557	0.195
2	2	Head	0.620148	0.2
2	2	Head	0.623897	0.205
2	2	Head	0.625961	0.21
2	2	Head	0.630273	0.215
2	2	Head	0.630956	0.22
2	2	Head	0.628744	0.225
2	2	Head	0.61916	0.23
2	2	Head	0.628278	0.235
2	2	Head	0.630521	0.24
2	2	Head	0.613342	0.245
2	2	Head	0.62953	0.25
2	2	Head	0.619915	0.255
2	2	Head	0.635721	0.26
2	2	Head	0.627086	0.265
2	2	Head	0.625206	0.27
2	2	Head	0.633908	0.275
2	2	Head	0.629218	0.28
2	2	Head	0.619309	0.285
2	2	Head	0.62212	0.29
2	2	Head	0.637366	0.295
2	2	Head	0.635373	0.3
2	2	Head	0.630486	0.305
2	2	Head	0.634112	0.31
2	2	Head	0.631442	0.315
2	2	Head	0.626142	0.32
2	2	Head	0.632091	0.325
2	2	Head	0.627079	0.33
2	2	Head	0.630089	0.335
2	2	Head	0.627348	0.34
2	2	Head	0.632384	0.345
2	2	Head	0.631174	0.35
2	2	Head	0.630964	0.355
2	2	Head	0.625617	0.36
2	2	Head	0.632072	0.365
2	2	Head	0.636315	0.37
2	2	Head	0.635169	0.375
2	2	Head	0.636563	0.38
2	2	Head	0.619943	0.385
2	2	Head	0.644654	0.39
2	2	Head	0.631581	0.395
2	2	Head	0.642696	0.4
2	2	Head	0.630435	0.405
2	2	Head	0.631672	0.41
2	2	Head	0.625449	0.415
2	2	Head	0.640875	0.42
2	2	Head	0.631709	0.425
2	2	Head	0.629538	0.43
2	2	Head	0.625894	0.435
2	2	Head	0.633971	0.44
2	2	Head	0.629013	0.445
2	2	Head	0.625978	0.45
2	2	Head	0.635581	0.455
2	2	Head	0.637878	0.46
2	2	Head	0.635512	0.465
2	2	Head	0.637865	0.47
2	2	Head	0.642749	0.475
2	2	Head	0.629786	0.48
2	2	Head	0.629901	0.485
2	2	Head	0.640341	0.49
2	2	Head	0.634056	0.495
2	2	Head	0.635335	0.5
2	2	Head	0.634978	0.505
2	2	Head	0.634285	0.51
2	2	Head	0.629203	0.515
2	2	Head	0.635902	0.52
2	2	Head	0.62646	0.525
2	2	Head	0.640953	0.53
2	2	Head	0.642638	0.535
2	2	Head	0.635383	0.54
2	2	Head	0.635883	0.545
2	2	Head	0.635694	0.55
2	2	Head	0.638324	0.555
2	2	Head	0.64214	0.56
2	2	Head	0.630232	0.565
2	2	Head	0.63387	0.57
2	2	Head	0.625333	0.575
2	2	Head	0.634849	0.58
2	2	Head	0.640244	0.585
2	2	Head	0.641524	0.59
2	2	Head	0.637242	0.595
2	2	Head	0.63945	0.6
2	2	Head	0.638568	0.605
2	2	Head	0.642168	0.61
2	2	Head	0.641143	0.615
2	2	Head	0.634108	0.62
2	2	Head	0.63643	0.625
2	2	Head	0.641677	0.63
2	2	Head	0.643594	0.635
2	2	Head	0.636167	0.64
2	2	Head	0.641088	0.645
2	2	Head	0.637565	0.65
2	2	Head	0.64152	0.655
2	2	Head	0.638805	0.66
2	2	Head	0.649016	0.665
2	2	Head	0.64348	0.67
2	2	Head	0.63952	0.675
2	2	Head	0.637412	0.68
2	2	Head	0.633035	0.685
2	2	Head	0.632915	0.69
2	2	Head	0.638659	0.695
2	2	Head	0.642728	0.7
2	2	Head	0.636793	0.705
2	2	Head	0.64588	0.71
2	2	Head	0.635855	0.715
2	2	Head	0.641898	0.72
2	2	Head	0.642946	0.725
2	2	Head	0.63796	0.73
2	2	Head	0.644167	0.735
2	2	Head	0.642823	0.74
2	2	Head	0.645181	0.745
2	2	Head	0.640585	0.75
2	2	Head	0.637528	0.755
2	2	Head	0.643364	0.76
2	2	Head	0.640513	0.765
2	2	Head	0.643864	0.77
2	2	Head	0.643489	0.775
2	2	Head	0.653026	0.78
2	2	Head	0.64914	0.785
2	2	Head	0.639004	0.79
2	2	Head	0.64343	0.795
2	2	Head	0.643339	0.8
2	2	Head	0.638885	0.805
2	2	Head	0.641387	0.81
2	2	Head	0.644199	0.815
2	2	Head	0.639815	0.82
2	2	Head	0.634894	0.825
2	2	Head	0.63521	0.83
2	2	Head	0.638277	0.835
2	2	Head	0.642439	0.84
2	2	Head	0.641841	0.845
2	2	Head	0.647712	0.85
2	2	Head	0.648356	0.855
2	2	Head	0.646652	0.86
2	2	Head	0.635175	0.865
2	2	Head	0.635098	0.87
2	2	Head	0.639418	0.875
2	2	Head	0.63868	0.88
2	2	Head	0.645759	0.885
2	2	Head	0.642633	0.89
2	2	Head	0.645978	0.895
2	2	Head	0.645534	0.9
2	2	Head	0.639899	0.905
2	2	Head	0.646445	0.91
2	2	Head	0.641078	0.915
2	2	Head	0.640864	0.92
2	2	Head	0.636164	0.925
2	2	Head	0.647786	0.93
2	2	Head	0.646104	0.935
2	2	Head	0.653764	0.94
2	2	Head	0.645164	0.945
2	2	Head	0.646723	0.95
2	2	Head	0.641537	0.955
2	2	Head	0.642831	0.96
2	2	Head	0.646476	0.965
2	2	Head	0.645338	0.97
2	2	Head	0.648558	0.975
2	2	Head	0.641683	0.98
2	2	Head	0.643505	0.985
2	2	Head	0.64524	0.99
2	2	Head	0.647779	0.995
2	2	Head	0.655365	1
2	3	Head	0.531202	0.005
2	3	Head	0.540132	0.01
2	3	Head	0.539238	0.015
2	3	Head	0.536817	0.02
2	3	Head	0.535144	0.025
2	3	Head	0.53391	0.03
2	3	Head	0.538872	0.035
2	3	Head	0.536942	0.04
2	3	Head	0.541393	0.045
2	3	Head	0.538824	0.05
2	3	Head	0.550744	0.055
2	3	Head	0.549306	0.06
2	3	Head	0.541702	0.065
2	3	Head	0.548047	0.07
2	3	Head	0.547559	0.075
2	3	Head	0.544388	0.08
2	3	Head	0.531822	0.085
2	3	Head	0.552461	0.09
2	3	Head	0.547767	0.095
2	3	Head	0.538619	0.1
2	3	Head	0.539219	0.105
2	3	Head	0.540885	0.11
2	3	Head	0.551946	0.115
2	3	Head	0.541517	0.12
2	3	Head	0.542995	0.125
2	3	Head	0.55233	0.13
2	3	Head	0.537166	0.135
2	3	Head	0.540153	0.14
2	3	Head	0.54816	0.145
2	3	Head	0.556273	0.15
2	3	Head	0.545286	0.155
2	3	Head	0.539062	0.16
2	3	Head	0.548028	0.165
2	3	Head	0.547553	0.17
2	3	Head	0.54127	0.175
2	3	Head	0.560252	0.18
2	3	Head	0.545642	0.185
2	3	Head	0.54674	0.19
2	3	Head	0.556531	0.195
2	3	Head	0.556216	0.2
2	3	Head	0.547659	0.205
2	3	Head	0.542147	0.21
2	3	Head	0.545175	0.215
2	3	Head	0.557548	0.22
2	3	Head	0.553378	0.225
2	3	Head	0.559017	0.23
2	3	Head	0.56156	0.235
2	3	Head	0.55223	0.24
2	3	Head	0.558169	0.245
2	3	Head	0.557382	0.25
2	3	Head	0.549706	0.255
2	3	Head	0.561036	0.26
2	3	Head	0.553409	0.265
2	3	Head	0.559703	0.27
2	3	Head	0.553066	0.275
2	3	Head	0.552133	0.28
2	3	Head	0.555369	0.285
2	3	Head	0.556789	0.29
2	3	Head	0.553874	0.295
2	3	Head	0.560788	0.3
2	3	Head	0.55924	0.305
2	3	Head	0.559949	0.31
2	3	Head	0.543658	0.315
2	3	Head	0.563788	0.32
2	3	Head	0.563379	0.325
2	3	Head	0.552972	0.33
2	3	Head	0.563376	0.335
2	3	Head	0.551859	0.34
2	3	Head	0.560419	0.345
2	3	Head	0.554691	0.35
2	3	Head	0.553469	0.355
2	3	Head	0.565902	0.36
2	3	Head	0.571309	0.365
2	3	Head	0.555108	0.37
2	3	Head	0.558557	0.375
2	3	Head	0.566975	0.38
2	3	Head	0.556923	0.385
2	3	Head	0.559601	0.39
2	3	Head	0.557023	0.395
2	3	Head	0.565353	0.4
2	3	Head	0.558327	0.405
2	3	Head	0.5599	0.41
2	3	Head	0.563343	0.415
2	3	Head	0.552351	0.42
2	3	Head	0.557465	0.425
2	3	Head	0.559496	0.43
2	3	Head	0.554898	0.435
2	3	Head	0.570045	0.44
2	3	Head	0.572689	0.445
2	3	Head	0.56905	0.45
2	3	Head	0.562348	0.455
2	3	Head	0.56784	0.46
2	3	Head	0.570622	0.465
2	3	Head	0.562784	0.47
2	3	Head	0.561103	0.475
2	3	Head	0.573522	0.48
2	3	Head	0.567359	0.485
2	3	Head	0.563522	0.49
2	3	Head	0.562198	0.495
2	3	Head	0.559834	0.5
2	3	Head	0.56472	0.505
2	3	Head	0.564654	0.51
2	3	Head	0.561102	0.515
2	3	Head	0.552846	0.52
2	3	Head	0.570447	0.525
2	3	Head	0.559748	0.53
2	3	Head	0.561335	0.535
2	3	Head	0.566842	0.54
2	3	Head	0.568816	0.545
2	3	Head	0.564446	0.55
2	3	Head	0.572262	0.555
2	3	Head	0.562118	0.56
2	3	Head	0.564375	0.565
2	3	Head	0.555945	0.57
2	3	Head	0.567079	0.575
2	3	Head	0.566709	0.58
2	3	Head	0.571506	0.585
2	3	Head	0.558386	0.59
2	3	Head	0.565858	0.595
2	3	Head	0.567211	0.6
2	3	Head	0.571007	0.605
2	3	Head	0.569242	0.61
2	3	Head	0.569279	0.615
2	3	Head	0.569892	0.62
2	3	Head	0.569872	0.625
2	3	Head	0.562908	0.63
2	3	Head	0.562806	0.635
2	3	Head	0.558679	0.64
2	3	Head	0.564132	0.645
2	3	Head	0.574433	0.65
2	3	Head	0.574904	0.655
2	3	Head	0.580102	0.66
2	3	Head	0.573671	0.665
2	3	Head	0.566892	0.67
2	3	Head	0.563815	0.675
2	3	Head	0.574597	0.68
2	3	Head	0.581707	0.685
2	3	Head	0.568047	0.69
2	3	Head	0.575032	0.695
2	3	Head	0.565763	0.7
2	3	Head	0.571352	0.705
2	3	Head	0.570344	0.71
2	3	Head	0.574595	0.715
2	3	Head	0.575263	0.72
2	3	Head	0.564589	0.725
2	3	Head	0.577624	0.73
2	3	Head	0.577162	0.735
2	3	Head	0.564034	0.74
2	3	Head	0.574655	0.745
2	3	Head	0.572317	0.75
2	3	Head	0.576528	0.755
2	3	Head	0.565658	0.76
2	3	Head	0.575318	0.765
2	3	Head	0.572152	0.77
2	3	Head	0.571117	0.775
2	3	Head	0.580808	0.78
2	3	Head	0.573906	0.785
2	3	Head	0.570188	0.79
2	3	Head	0.582695	0.795
2	3	Head	0.582942	0.8
2	3	Head	0.566525	0.805
2	3	Head	0.572475	0.81
2	3	Head	0.579517	0.815
2	3	Head	0.572697	0.82
2	3	Head	0.572851	0.825
2	3	Head	0.584797	0.83
2	3	Head	0.566149	0.835
2	3	Head	0.574301	0.84
2	3	Head	0.580387	0.845
2	3	Head	0.590064	0.85
2	3	Head	0.574393	0.855
2	3	Head	0.577501	0.86
2	3	Head	0.584789	0.865
2	3	Head	0.581092	0.87
2	3	Head	0.563084	0.875
2	3	Head	0.573892	0.88
2	3	Head	0.573038	0.885
2	3	Head	0.573808	0.89
2	3	Head	0.583063	0.895
2	3	Head	0.585072	0.9
2	3	Head	0.579761	0.905
2	3	Head	0.580097	0.91
2	3	Head	0.574648	0.915
2	3	Head	0.578357	0.92
2	3	Head	0.581418	0.925
2	3	Head	0.573925	0.93
2	3	Head	0.573337	0.935
2	3	Head	0.580659	0.94
2	3	Head	0.580876	0.945
2	3	Head	0.581427	0.95
2	3	Head	0.577916	0.955
2	3	Head	0.574797	0.96
2	3	Head	0.580002	0.965
2	3	Head	0.583913	0.97
2	3	Head	0.572266	0.975
2	3	Head	0.577198	0.98
2	3	Head	0.579548	0.985
2	3	Head	0.569104	0.99
2	3	Head	0.577761	0.995
2	3	Head	0.589916	1
3	1	Head	0.73445	0.005
3	1	Head	0.727926	0.01
3	1	Head	0.730851	0.015
3	1	Head	0.737192	0.02
3	1	Head	0.734563	0.025
3	1	Head	0.731741	0.03
3	1	Head	0.730274	0.035
3	1	Head	0.733657	0.04
3	1	Head	0.72789	0.045
3	1	Head	0.73711	0.05
3	1	Head	0.731568	0.055
3	1	Head	0.733486	0.06
3	1	Head	0.733212	0.065
3	1	Head	0.732336	0.07
3	1	Head	0.736667	0.075
3	1	Head	0.731465	0.08
3	1	Head	0.73951	0.085
3	1	Head	0.739343	0.09
3	1	Head	0.736683	0.095
3	1	Head	0.732923	0.1
3	1	Head	0.7413	0.105
3	1	Head	0.736285	0.11
3	1	Head	0.734538	0.115
3	1	Head	0.729966	0.12
3	1	Head	0.736191	0.125
3	1	Head	0.742062	0.13
3	1	Head	0.736763	0.135
3	1	Head	0.739733	0.14
3	1	Head	0.736505	0.145
3	1	Head	0.742101	0.15
3	1	Head	0.734051	0.155
3	1	Head	0.735765	0.16
3	1	Head	0.731278	0.165
3	1	Head	0.747488	0.17
3	1	Head	0.730997	0.175
3	1	Head	0.73863	0.18
3	1	Head	0.74129	0.185
3	1	Head	0.731617	0.19
3	1	Head	0.740308	0.195
3	1	Head	0.731619	0.2
3	1	Head	0.735023	0.205
3	1	Head	0.733548	0.21
3	1	Head	0.741431	0.215
3	1	Head	0.741551	0.22
3	1	Head	0.72808	0.225
3	1	Head	0.735935	0.23
3	1	Head	0.735638	0.235
3	1	Head	0.734139	0.24
3	1	Head	0.742545	0.245
3	1	Head	0.737659	0.25
3	1	Head	0.738174	0.255
3	1	Head	0.735796	0.26
3	1	Head	0.735383	0.265
3	1	Head	0.733889	0.27
3	1	Head	0.744084	0.275
3	1	Head	0.740423	0.28
3	1	Head	0.744333	0.285
3	1	Head	0.736391	0.29
3	1	Head	0.738238	0.295
3	1	Head	0.732324	0.3
3	1	Head	0.735172	0.305
3	1	Head	0.735059	0.31
3	1	Head	0.739614	0.315
3	1	Head	0.734371	0.32
3	1	Head	0.743043	0.325
3	1	Head	0.738692	0.33
3	1	Head	0.736359	0.335
3	1	Head	0.743364	0.34
3	1	Head	0.736461	0.345
3	1	Head	0.743766	0.35
3	1	Head	0.741912	0.355
3	1	Head	0.739332	0.36
3	1	Head	0.738208	0.365
3	1	Head	0.74072	0.37
3	1	Head	0.741932	0.375
3	1	Head	0.73662	0.38
3	1	Head	0.743976	0.385
3	1	Head	0.737263	0.39
3	1	Head	0.73926	0.395
3	1	Head	0.743497	0.4
3	1	Head	0.739675	0.405
3	1	Head	0.739961	0.41
3	1	Head	0.736637	0.415
3	1	Head	0.739786	0.42
3	1	Head	0.736076	0.425
3	1	Head	0.739061	0.43
3	1	Head	0.738053	0.435
3	1	Head	0.735158	0.44
3	1	Head	0.740206	0.445
3	1	Head	0.737916	0.45
3	1	Head	0.736741	0.455
3	1	Head	0.740103	0.46
3	1	Head	0.736805	0.465
3	1	Head	0.744875	0.47
3	1	Head	0.739259	0.475
3	1	Head	0.741232	0.48
3	1	Head	0.744468	0.485
3	1	Head	0.733509	0.49
3	1	Head	0.743348	0.495
3	1	Head	0.733319	0.5
3	1	Head	0.743875	0.505
3	1	Head	0.733481	0.51
3	1	Head	0.736003	0.515
3	1	Head	0.733573	0.52
3	1	Head	0.744491	0.525
3	1	Head	0.726326	0.53
3	1	Head	0.739825	0.535
3	1	Head	0.740059	0.54
3	1	Head	0.740777	0.545
3	1	Head	0.736305	0.55
3	1	Head	0.739439	0.555
3	1	Head	0.737995	0.56
3	1	Head	0.738751	0.565
3	1	Head	0.741742	0.57
3	1	Head	0.741921	0.575
3	1	Head	0.74095	0.58
3	1	Head	0.737871	0.585
3	1	Head	0.73753	0.59
3	1	Head	0.742861	0.595
3	1	Head	0.740464	0.6
3	1	Head	0.736131	0.605
3	1	Head	0.741705	0.61
3	1	Head	0.740695	0.615
3	1	Head	0.740876	0.62
3	1	Head	0.741693	0.625
3	1	Head	0.735178	0.63
3	1	Head	0.739068	0.635
3	1	Head	0.744623	0.64
3	1	Head	0.742217	0.645
3	1	Head	0.74863	0.65
3	1	Head	0.740924	0.655
3	1	Head	0.738776	0.66
3	1	Head	0.736415	0.665
3	1	Head	0.74406	0.67
3	1	Head	0.739624	0.675
3	1	Head	0.742113	0.68
3	1	Head	0.740276	0.685
3	1	Head	0.743787	0.69
3	1	Head	0.746465	0.695
3	1	Head	0.742721	0.7
3	1	Head	0.744517	0.705
3	1	Head	0.739119	0.71
3	1	Head	0.743891	0.715
3	1	Head	0.737293	0.72
3	1	Head	0.745797	0.725
3	1	Head	0.747029	0.73
3	1	Head	0.740745	0.735
3	1	Head	0.734562	0.74
3	1	Head	0.739313	0.745
3	1	Head	0.74612	0.75
3	1	Head	0.745689	0.755
3	1	Head	0.74296	0.76
3	1	Head	0.741419	0.765
3	1	Head	0.745494	0.77
3	1	Head	0.73745	0.775
3	1	Head	0.745908	0.78
3	1	Head	0.740624	0.785
3	1	Head	0.745597	0.79
3	1	Head	0.743291	0.795
3	1	Head	0.735566	0.8
3	1	Head	0.731315	0.805
3	1	Head	0.741341	0.81
3	1	Head	0.744646	0.815
3	1	Head	0.740746	0.82
3	1	Head	0.742804	0.825
3	1	Head	0.741306	0.83
3	1	Head	0.743467	0.835
3	1	Head	0.738189	0.84
3	1	Head	0.740599	0.845
3	1	Head	0.744215	0.85
3	1	Head	0.738773	0.855
3	1	Head	0.745964	0.86
3	1	Head	0.743401	0.865
3	1	Head	0.74527	0.87
3	1	Head	0.742037	0.875
3	1	Head	0.746843	0.88
3	1	Head	0.741136	0.885
3	1	Head	0.744103	0.89
3	1	Head	0.747936	0.895
3	1	Head	0.737592	0.9
3	1	Head	0.740873	0.905
3	1	Head	0.74393	0.91
3	1	Head	0.74267	0.915
3	1	Head	0.743445	0.92
3	1	Head	0.738248	0.925
3	1	Head	0.751541	0.93
3	1	Head	0.743556	0.935
3	1	Head	0.742426	0.94
3	1	Head	0.745523	0.945
3	1	Head	0.735742	0.95
3	1	Head	0.746293	0.955
3	1	Head	0.740898	0.96
3	1	Head	0.743658	0.965
3	1	Head	0.737826	0.97
3	1	Head	0.74768	0.975
3	1	Head	0.745327	0.98
3	1	Head	0.747628	0.985
3	1	Head	0.745532	0.99
3	1	Head	0.738282	0.995
3	1	Head	0.74493	1
3	2	Head	0.614314	0.005
3	2	Head	0.605072	0.01
3	2	Head	0.621172	0.015
3	2	Head	0.606341	0.02
3	2	Head	0.620309	0.025
3	2	Head	0.61266	0.03
3	2	Head	0.613379	0.035
3	2	Head	0.622102	0.04
3	2	Head	0.627412	0.045
3	2	Head	0.615492	0.05
3	2	Head	0.610476	0.055
3	2	Head	0.621225	0.06
3	2	Head	0.623191	0.065
3	2	Head	0.622935	0.07
3	2	Head	0.617004	0.075
3	2	Head	0.616315	0.08
3	2	Head	0.617661	0.085
3	2	Head	0.613978	0.09
3	2	Head	0.630002	0.095
3	2	Head	0.616735	0.1
3	2	Head	0.628902	0.105
3	2	Head	0.624126	0.11
3	2	Head	0.630289	0.115
3	2	Head	0.624727	0.12
3	2	Head	0.630616	0.125
3	2	Head	0.617558	0.13
3	2	Head	0.623556	0.135
3	2	Head	0.622702	0.14
3	2	Head	0.62581	0.145
3	2	Head	0.624794	0.15
3	2	Head	0.625454	0.155
3	2	Head	0.626274	0.16
3	2	Head	0.619772	0.165
3	2	Head	0.628098	0.17
3	2	Head	0.626643	0.175
3	2	Head	0.630495	0.18
3	2	Head	0.620259	0.185
3	2	Head	0.627979	0.19
3	2	Head	0.638491	0.195
3	2	Head	0.622404	0.2
3	2	Head	0.641337	0.205
3	2	Head	0.630337	0.21
3	2	Head	0.6237	0.215
3	2	Head	0.612641	0.22
3	2	Head	0.628139	0.225
3	2	Head	0.634226	0.23
3	2	Head	0.62525	0.235
3	2	Head	0.631264	0.24
3	2	Head	0.622511	0.245
3	2	Head	0.633378	0.25
3	2	Head	0.628508	0.255
3	2	Head	0.627207	0.26
3	2	Head	0.615632	0.265
3	2	Head	0.625523	0.27
3	2	Head	0.628055	0.275
3	2	Head	0.619781	0.28
3	2	Head	0.633842	0.285
3	2	Head	0.627415	0.29
3	2	Head	0.626355	0.295
3	2	Head	0.628741	0.3
3	2	Head	0.626803	0.305
3	2	Head	0.626981	0.31
3	2	Head	0.626048	0.315
3	2	Head	0.629118	0.32
3	2	Head	0.624564	0.325
3	2	Head	0.644108	0.33
3	2	Head	0.630161	0.335
3	2	Head	0.631584	0.34
3	2	Head	0.626505	0.345
3	2	Head	0.626904	0.35
3	2	Head	0.633732	0.355
3	2	Head	0.637866	0.36
3	2	Head	0.629213	0.365
3	2	Head	0.637872	0.37
3	2	Head	0.628771	0.375
3	2	Head	0.627694	0.38
3	2	Head	0.631499	0.385
3	2	Head	0.633667	0.39
3	2	Head	0.634126	0.395
3	2	Head	0.637638	0.4
3	2	Head	0.640157	0.405
3	2	Head	0.632518	0.41
3	2	Head	0.642604	0.415
3	2	Head	0.628029	0.42
3	2	Head	0.627329	0.425
3	2	Head	0.629542	0.43
3	2	Head	0.638216	0.435
3	2	Head	0.635581	0.44
3	2	Head	0.63104	0.445
3	2	Head	0.634308	0.45
3	2	Head	0.640045	0.455
3	2	Head	0.6386	0.46
3	2	Head	0.635165	0.465
3	2	Head	0.640452	0.47
3	2	Head	0.643227	0.475
3	2	Head	0.626978	0.48
3	2	Head	0.636023	0.485
3	2	Head	0.633752	0.49
3	2	Head	0.637861	0.495
3	2	Head	0.625027	0.5
3	2	Head	0.632623	0.505
3	2	Head	0.630849	0.51
3	2	Head	0.634809	0.515
3	2	Head	0.630372	0.52
3	2	Head	0.629601	0.525
3	2	Head	0.628611	0.53
3	2	Head	0.631033	0.535
3	2	Head	0.631798	0.54
3	2	Head	0.632512	0.545
3	2	Head	0.627447	0.55
3	2	Head	0.625291	0.555
3	2	Head	0.636938	0.56
3	2	Head	0.633055	0.565
3	2	Head	0.640581	0.57
3	2	Head	0.6348	0.575
3	2	Head	0.644631	0.58
3	2	Head	0.631445	0.585
3	2	Head	0.638335	0.59
3	2	Head	0.647651	0.595
3	2	Head	0.636095	0.6
3	2	Head	0.645767	0.605
3	2	Head	0.63546	0.61
3	2	Head	0.634152	0.615
3	2	Head	0.6473	0.62
3	2	Head	0.633058	0.625
3	2	Head	0.63507	0.63
3	2	Head	0.635882	0.635
3	2	Head	0.642026	0.64
3	2	Head	0.644757	0.645
3	2	Head	0.636522	0.65
3	2	Head	0.644669	0.655
3	2	Head	0.639745	0.66
3	2	Head	0.633515	0.665
3	2	Head	0.644612	0.67
3	2	Head	0.639071	0.675
3	2	Head	0.639713	0.68
3	2	Head	0.636537	0.685
3	2	Head	0.641323	0.69
3	2	Head	0.643297	0.695
3	2	Head	0.640701	0.7
3	2	Head	0.643842	0.705
3	2	Head	0.640705	0.71
3	2	Head	0.625897	0.715
3	2	Head	0.644291	0.72
3	2	Head	0.644817	0.725
3	2	Head	0.638322	0.73
3	2	Head	0.630621	0.735
3	2	Head	0.642672	0.74
3	2	Head	0.647882	0.745
3	2	Head	0.649072	0.75
3	2	Head	0.644824	0.755
3	2	Head	0.630021	0.76
3	2	Head	0.643176	0.765
3	2	Head	0.63127	0.77
3	2	Head	0.639799	0.775
3	2	Head	0.635107	0.78
3	2	Head	0.63601	0.785
3	2	Head	0.6407	0.79
3	2	Head	0.648336	0.795
3	2	Head	0.654696	0.8
3	2	Head	0.640519	0.805
3	2	Head	0.644658	0.81
3	2	Head	0.635033	0.815
3	2	Head	0.64311	0.82
3	2	Head	0.643672	0.825
3	2	Head	0.637892	0.83
3	2	Head	0.649668	0.835
3	2	Head	0.64102	0.84
3	2	Head	0.647241	0.845
3	2	Head	0.640197	0.85
3	2	Head	0.641219	0.855
3	2	Head	0.641542	0.86
3	2	Head	0.643211	0.865
3	2	Head	0.638809	0.87
3	2	Head	0.645006	0.875
3	2	Head	0.652356	0.88
3	2	Head	0.638913	0.885
3	2	Head	0.645525	0.89
3	2	Head	0.64453	0.895
3	2	Head	0.636679	0.9
3	2	Head	0.646016	0.905
3	2	Head	0.648762	0.91
3	2	Head	0.640293	0.915
3	2	Head	0.645151	0.92
3	2	Head	0.63565	0.925
3	2	Head	0.642355	0.93
3	2	Head	0.648178	0.935
3	2	Head	0.649219	0.94
3	2	Head	0.647405	0.945
3	2	Head	0.641389	0.95
3	2	Head	0.647898	0.955
3	2	Head	0.646167	0.96
3	2	Head	0.647959	0.965
3	2	Head	0.641376	0.97
3	2	Head	0.649092	0.975
3	2	Head	0.645683	0.98
3	2	Head	0.639288	0.985
3	2	Head	0.648855	0.99
3	2	Head	0.644406	0.995
3	2	Head	0.646619	1
3	3	Head	0.522462	0.005
3	3	Head	0.54451	0.01
3	3	Head	0.527651	0.015
3	3	Head	0.536036	0.02
3	3	Head	0.542168	0.025
3	3	Head	0.548413	0.03
3	3	Head	0.534021	0.035
3	3	Head	0.535818	0.04
3	3	Head	0.53488	0.045
3	3	Head	0.537421	0.05
3	3	Head	0.527233	0.055
3	3	Head	0.554311	0.06
3	3	Head	0.544288	0.065
3	3	Head	0.540886	0.07
3	3	Head	0.533085	0.075
3	3	Head	0.547426	0.08
3	3	Head	0.544816	0.085
3	3	Head	0.556014	0.09
3	3	Head	0.552329	0.095
3	3	Head	0.540729	0.1
3	3	Head	0.540349	0.105
3	3	Head	0.549434	0.11
3	3	Head	0.542532	0.115
3	3	Head	0.546368	0.12
3	3	Head	0.541016	0.125
3	3	Head	0.54621	0.13
3	3	Head	0.541223	0.135
3	3	Head	0.552564	0.14
3	3	Head	0.555499	0.145
3	3	Head	0.550519	0.15
3	3	Head	0.544232	0.155
3	3	Head	0.542271	0.16
3	3	Head	0.550392	0.165
3	3	Head	0.548457	0.17
3	3	Head	0.548707	0.175
3	3	Head	0.554048	0.18
3	3	Head	0.554467	0.185
3	3	Head	0.55385	0.19
3	3	Head	0.558778	0.195
3	3	Head	0.550334	0.2
3	3	Head	0.55756	0.205
3	3	Head	0.548972	0.21
3	3	Head	0.536375	0.215
3	3	Head	0.547834	0.22
3	3	Head	0.551297	0.225
3	3	Head	0.555396	0.23
3	3	Head	0.565089	0.235
3	3	Head	0.54429	0.24
3	3	Head	0.545921	0.245
3	3	Head	0.567174	0.25
3	3	Head	0.555082	0.255
3	3	Head	0.550796	0.26
3	3	Head	0.549407	0.265
3	3	Head	0.549605	0.27
3	3	Head	0.552128	0.275
3	3	Head	0.561375	0.28
3	3	Head	0.560074	0.285
3	3	Head	0.552033	0.29
3	3	Head	0.56237	0.295
3	3	Head	0.548778	0.3
3	3	Head	0.558266	0.305
3	3	Head	0.556857	0.31
3	3	Head	0.565084	0.315
3	3	Head	0.558458	0.32
3	3	Head	0.559615	0.325
3	3	Head	0.551146	0.33
3	3	Head	0.563941	0.335
3	3	Head	0.56599	0.34
3	3	Head	0.557037	0.345
3	3	Head	0.561117	0.35
3	3	Head	0.55431	0.355
3	3	Head	0.558709	0.36
3	3	Head	0.566763	0.365
3	3	Head	0.561271	0.37
3	3	Head	0.567087	0.375
3	3	Head	0.564497	0.38
3	3	Head	0.545144	0.385
3	3	Head	0.564803	0.39
3	3	Head	0.55401	0.395
3	3	Head	0.5619	0.4
3	3	Head	0.557387	0.405
3	3	Head	0.565709	0.41
3	3	Head	0.556628	0.415
3	3	Head	0.562469	0.42
3	3	Head	0.565822	0.425
3	3	Head	0.559812	0.43
3	3	Head	0.556108	0.435
3	3	Head	0.5587	0.44
3	3	Head	0.563254	0.445
3	3	Head	0.560102	0.45
3	3	Head	0.565853	0.455
3	3	Head	0.561821	0.46
3	3	Head	0.569413	0.465
3	3	Head	0.571388	0.47
3	3	Head	0.567609	0.475
3	3	Head	0.566721	0.48
3	3	Head	0.566168	0.485
3	3	Head	0.565299	0.49
3	3	Head	0.571293	0.495
3	3	Head	0.564019	0.5
3	3	Head	0.565241	0.505
3	3	Head	0.571601	0.51
3	3	Head	0.562143	0.515
3	3	Head	0.566446	0.52
3	3	Head	0.55798	0.525
3	3	Head	0.565066	0.53
3	3	Head	0.560648	0.535
3	3	Head	0.566479	0.54
3	3	Head	0.557237	0.545
3	3	Head	0.561468	0.55
3	3	Head	0.557265	0.555
3	3	Head	0.571956	0.56
3	3	Head	0.573633	0.565
3	3	Head	0.555588	0.57
3	3	Head	0.558156	0.575
3	3	Head	0.561375	0.58
3	3	Head	0.57291	0.585
3	3	Head	0.567762	0.59
3	3	Head	0.571139	0.595
3	3	Head	0.567611	0.6
3	3	Head	0.567447	0.605
3	3	Head	0.563792	0.61
3	3	Head	0.561072	0.615
3	3	Head	0.5693	0.62
3	3	Head	0.571423	0.625
3	3	Head	0.572851	0.63
3	3	Head	0.559925	0.635
3	3	Head	0.565422	0.64
3	3	Head	0.57326	0.645
3	3	Head	0.571871	0.65
3	3	Head	0.572792	0.655
3	3	Head	0.580704	0.66
3	3	Head	0.574349	0.665
3	3	Head	0.564098	0.67
3	3	Head	0.568357	0.675
3	3	Head	0.579614	0.68
3	3	Head	0.577693	0.685
3	3	Head	0.56644	0.69
3	3	Head	0.573629	0.695
3	3	Head	0.581028	0.7
3	3	Head	0.566071	0.705
3	3	Head	0.571089	0.71
3	3	Head	0.570363	0.715
3	3	Head	0.576268	0.72
3	3	Head	0.573208	0.725
3	3	Head	0.572802	0.73
3	3	Head	0.571305	0.735
3	3	Head	0.575379	0.74
3	3	Head	0.572797	0.745
3	3	Head	0.576119	0.75
3	3	Head	0.576292	0.755
3	3	Head	0.562888	0.76
3	3	Head	0.576511	0.765
3	3	Head	0.571947	0.77
3	3	Head	0.577286	0.775
3	3	Head	0.57714	0.78
3	3	Head	0.574563	0.785
3	3	Head	0.571431	0.79
3	3	Head	0.570656	0.795
3	3	Head	0.571445	0.8
3	3	Head	0.572236	0.805
3	3	Head	0.576933	0.81
3	3	Head	0.572329	0.815
3	3	Head	0.585342	0.82
3	3	Head	0.573925	0.825
3	3	Head	0.58467	0.83
3	3	Head	0.57289	0.835
3	3	Head	0.573656	0.84
3	3	Head	0.573232	0.845
3	3	Head	0.570796	0.85
3	3	Head	0.586525	0.855
3	3	Head	0.578362	0.86
3	3	Head	0.576206	0.865
3	3	Head	0.578922	0.87
3	3	Head	0.572565	0.875
3	3	Head	0.569689	0.88
3	3	Head	0.567615	0.885
3	3	Head	0.575852	0.89
3	3	Head	0.585209	0.895
3	3	Head	0.579464	0.9
3	3	Head	0.576902	0.905
3	3	Head	0.578355	0.91
3	3	Head	0.576122	0.915
3	3	Head	0.570469	0.92
3	3	Head	0.573851	0.925
3	3	Head	0.576712	0.93
3	3	Head	0.573643	0.935
3	3	Head	0.575989	0.94
3	3	Head	0.575463	0.945
3	3	Head	0.578463	0.95
3	3	Head	0.582326	0.955
3	3	Head	0.577533	0.96
3	3	Head	0.572022	0.965
3	3	Head	0.579164	0.97
3	3	Head	0.584214	0.975
3	3	Head	0.570614	0.98
3	3	Head	0.575119	0.985
3	3	Head	0.580351	0.99
3	3	Head	0.574367	0.995
3	3	Head	0.572933	1
4	1	Head	0.725919	0.005
4	1	Head	0.731814	0.01
4	1	Head	0.733612	0.015
4	1	Head	0.727469	0.02
4	1	Head	0.732731	0.025
4	1	Head	0.732513	0.03
4	1	Head	0.730921	0.035
4	1	Head	0.720539	0.04
4	1	Head	0.735389	0.045
4	1	Head	0.735424	0.05
4	1	Head	0.732416	0.055
4	1	Head	0.733078	0.06
4	1	Head	0.724874	0.065
4	1	Head	0.734632	0.07
4	1	Head	0.736597	0.075
4	1	Head	0.734402	0.08
4	1	Head	0.737627	0.085
4	1	Head	0.726934	0.09
4	1	Head	0.734469	0.095
4	1	Head	0.731386	0.1
4	1	Head	0.745384	0.105
4	1	Head	0.743647	0.11
4	1	Head	0.734775	0.115
4	1	Head	0.736315	0.12
4	1	Head	0.730324	0.125
4	1	Head	0.735462	0.13
4	1	Head	0.734978	0.135
4	1	Head	0.738618	0.14
4	1	Head	0.737136	0.145
4	1	Head	0.742608	0.15
4	1	Head	0.738365	0.155
4	1	Head	0.737077	0.16
4	1	Head	0.73036	0.165
4	1	Head	0.745964	0.17
4	1	Head	0.735318	0.175
4	1	Head	0.733896	0.18
4	1	Head	0.729526	0.185
4	1	Head	0.74017	0.19
4	1	Head	0.73939	0.195
4	1	Head	0.734457	0.2
4	1	Head	0.738556	0.205
4	1	Head	0.737212	0.21
4	1	Head	0.731306	0.215
4	1	Head	0.733303	0.22
4	1	Head	0.7354	0.225
4	1	Head	0.742682	0.23
4	1	Head	0.738433	0.235
4	1	Head	0.736947	0.24
4	1	Head	0.739452	0.245
4	1	Head	0.738536	0.25
4	1	Head	0.741288	0.255
4	1	Head	0.739393	0.26
4	1	Head	0.733029	0.265
4	1	Head	0.732988	0.27
4	1	Head	0.733556	0.275
4	1	Head	0.735605	0.28
4	1	Head	0.730157	0.285
4	1	Head	0.736758	0.29
4	1	Head	0.733344	0.295
4	1	Head	0.735057	0.3
4	1	Head	0.735926	0.305
4	1	Head	0.741931	0.31
4	1	Head	0.732796	0.315
4	1	Head	0.738533	0.32
4	1	Head	0.743131	0.325
4	1	Head	0.74277	0.33
4	1	Head	0.738673	0.335
4	1	Head	0.741084	0.34
4	1	Head	0.746758	0.345
4	1	Head	0.745584	0.35
4	1	Head	0.740843	0.355
4	1	Head	0.741938	0.36
4	1	Head	0.74306	0.365
4	1	Head	0.748387	0.37
4	1	Head	0.741565	0.375
4	1	Head	0.736423	0.38
4	1	Head	0.741162	0.385
4	1	Head	0.741291	0.39
4	1	Head	0.732	0.395
4	1	Head	0.738192	0.4
4	1	Head	0.740993	0.405
4	1	Head	0.737905	0.41
4	1	Head	0.741006	0.415
4	1	Head	0.743734	0.42
4	1	Head	0.737084	0.425
4	1	Head	0.742938	0.43
4	1	Head	0.735967	0.435
4	1	Head	0.739293	0.44
4	1	Head	0.740009	0.445
4	1	Head	0.735442	0.45
4	1	Head	0.731177	0.455
4	1	Head	0.746607	0.46
4	1	Head	0.742986	0.465
4	1	Head	0.735673	0.47
4	1	Head	0.739488	0.475
4	1	Head	0.741065	0.48
4	1	Head	0.738938	0.485
4	1	Head	0.735288	0.49
4	1	Head	0.742514	0.495
4	1	Head	0.738273	0.5
4	1	Head	0.735207	0.505
4	1	Head	0.741004	0.51
4	1	Head	0.735227	0.515
4	1	Head	0.738807	0.52
4	1	Head	0.736148	0.525
4	1	Head	0.735317	0.53
4	1	Head	0.739838	0.535
4	1	Head	0.741314	0.54
4	1	Head	0.743872	0.545
4	1	Head	0.737725	0.55
4	1	Head	0.741283	0.555
4	1	Head	0.740599	0.56
4	1	Head	0.74042	0.565
4	1	Head	0.748446	0.57
4	1	Head	0.741101	0.575
4	1	Head	0.742625	0.58
4	1	Head	0.736521	0.585
4	1	Head	0.733899	0.59
4	1	Head	0.743973	0.595
4	1	Head	0.743936	0.6
4	1	Head	0.744142	0.605
4	1	Head	0.740546	0.61
4	1	Head	0.743599	0.615
4	1	Head	0.743219	0.62
4	1	Head	0.740882	0.625
4	1	Head	0.742369	0.63
4	1	Head	0.742535	0.635
4	1	Head	0.735343	0.64
4	1	Head	0.739259	0.645
4	1	Head	0.74434	0.65
4	1	Head	0.735059	0.655
4	1	Head	0.738502	0.66
4	1	Head	0.741078	0.665
4	1	Head	0.748886	0.67
4	1	Head	0.739212	0.675
4	1	Head	0.746255	0.68
4	1	Head	0.743126	0.685
4	1	Head	0.744125	0.69
4	1	Head	0.74183	0.695
4	1	Head	0.741584	0.7
4	1	Head	0.739145	0.705
4	1	Head	0.742387	0.71
4	1	Head	0.747135	0.715
4	1	Head	0.745979	0.72
4	1	Head	0.742861	0.725
4	1	Head	0.745644	0.73
4	1	Head	0.741466	0.735
4	1	Head	0.744052	0.74
4	1	Head	0.744242	0.745
4	1	Head	0.737525	0.75
4	1	Head	0.744629	0.755
4	1	Head	0.748496	0.76
4	1	Head	0.740301	0.765
4	1	Head	0.740816	0.77
4	1	Head	0.749971	0.775
4	1	Head	0.741757	0.78
4	1	Head	0.740849	0.785
4	1	Head	0.739568	0.79
4	1	Head	0.743481	0.795
4	1	Head	0.738766	0.8
4	1	Head	0.739052	0.805
4	1	Head	0.736414	0.81
4	1	Head	0.745885	0.815
4	1	Head	0.742072	0.82
4	1	Head	0.74252	0.825
4	1	Head	0.741173	0.83
4	1	Head	0.747776	0.835
4	1	Head	0.742368	0.84
4	1	Head	0.748331	0.845
4	1	Head	0.741531	0.85
4	1	Head	0.738684	0.855
4	1	Head	0.740204	0.86
4	1	Head	0.743479	0.865
4	1	Head	0.743736	0.87
4	1	Head	0.742195	0.875
4	1	Head	0.747091	0.88
4	1	Head	0.732725	0.885
4	1	Head	0.740837	0.89
4	1	Head	0.742123	0.895
4	1	Head	0.735576	0.9
4	1	Head	0.742808	0.905
4	1	Head	0.738654	0.91
4	1	Head	0.742392	0.915
4	1	Head	0.738563	0.92
4	1	Head	0.743019	0.925
4	1	Head	0.748954	0.93
4	1	Head	0.741419	0.935
4	1	Head	0.741366	0.94
4	1	Head	0.743414	0.945
4	1	Head	0.746893	0.95
4	1	Head	0.743915	0.955
4	1	Head	0.745778	0.96
4	1	Head	0.735505	0.965
4	1	Head	0.748592	0.97
4	1	Head	0.749147	0.975
4	1	Head	0.740868	0.98
4	1	Head	0.746002	0.985
4	1	Head	0.741941	0.99
4	1	Head	0.740309	0.995
[truncated: 7,001 more rows]

## Sheet: Exp_2_Capacitance
Body	well	Time	Volt	rep
Head	1	0	0.875607	1
Head	1	0.01	0.859753	1
Head	1	0.02	0.829518	1
Head	1	0.03	0.811331	1
Head	1	0.04	0.74757	1
Head	1	0.05	0.728126	1
Head	1	0.06	0.762777	1
Head	1	0.07	0.713909	1
Head	1	0.08	0.691559	1
Head	1	0.09	0.692045	1
Head	1	0.1	0.646772	1
Head	1	0.11	0.652451	1
Head	1	0.12	0.65682	1
Head	1	0.13	0.623485	1
Head	1	0.14	0.610578	1
Head	1	0.15	0.582229	1
Head	1	0.16	0.597009	1
Head	1	0.17	0.536079	1
Head	1	0.18	0.553387	1
Head	1	0.19	0.553897	1
Head	1	0.2	0.523393	1
Head	1	0.21	0.514383	1
Head	1	0.22	0.495231	1
Head	1	0.23	0.485193	1
Head	1	0.24	0.477595	1
Head	1	0.25	0.450926	1
Head	1	0.26	0.465701	1
Head	1	0.27	0.425861	1
Head	1	0.28	0.421898	1
Head	1	0.29	0.402417	1
Head	1	0.3	0.401911	1
Head	1	0.31	0.388905	1
Head	1	0.32	0.3254	1
Head	1	0.33	0.363915	1
Head	1	0.34	0.383658	1
Head	1	0.35	0.365126	1
Head	1	0.36	0.357645	1
Head	1	0.37	0.35592	1
Head	1	0.38	0.338094	1
Head	1	0.39	0.334976	1
Head	1	0.4	0.321417	1
Head	1	0.41	0.260965	1
Head	1	0.42	0.312246	1
Head	1	0.43	0.299148	1
Head	1	0.44	0.289453	1
Head	1	0.45	0.281762	1
Head	1	0.46	0.270055	1
Head	1	0.47	0.274519	1
Head	1	0.48	0.269627	1
Head	1	0.49	0.24028	1
Head	1	0.5	0.235438	1
Head	1	0.51	0.18684	1
Head	1	0.52	0.239746	1
Head	1	0.53	0.235306	1
Head	1	0.54	0.201728	1
Head	1	0.55	0.209041	1
Head	1	0.56	0.218485	1
Head	1	0.57	0.201857	1
Head	1	0.58	0.205304	1
Head	1	0.59	0.150317	1
Head	1	0.6	0.163528	1
Head	1	0.61	0.179747	1
Head	1	0.62	0.176531	1
Head	1	0.63	0.180814	1
Head	1	0.64	0.170022	1
Head	1	0.65	0.166438	1
Head	1	0.66	0.165471	1
Head	1	0.67	0.142013	1
Head	1	0.68	0.156415	1
Head	1	0.69	0.14564	1
Head	1	0.7	0.130675	1
Head	1	0.71	0.0979791	1
Head	1	0.72	0.115485	1
Head	1	0.73	0.14176	1
Head	1	0.74	0.138982	1
Head	1	0.75	0.10641	1
Head	1	0.76	0.0799944	1
Head	1	0.77	0.127013	1
Head	1	0.78	0.109799	1
Head	1	0.79	0.122781	1
Head	1	0.8	0.0815764	1
Head	1	0.81	0.101336	1
Head	1	0.82	0.104893	1
Head	1	0.83	0.0940816	1
Head	1	0.84	0.105531	1
Head	1	0.85	0.0748349	1
Head	1	0.86	0.0980018	1
Head	1	0.87	0.0815651	1
Head	1	0.88	0.0836483	1
Head	1	0.89	0.0872213	1
Head	1	0.9	0.074386	1
Head	1	0.91	0.0795816	1
Head	1	0.92	0.0613781	1
Head	1	0.93	0.0762581	1
Head	1	0.94	0.0499922	1
Head	1	0.95	0.0489499	1
Head	1	0.96	0.0603757	1
Head	1	0.97	0.0728713	1
Head	1	0.98	0.0470374	1
Head	1	0.99	0.0314408	1
Head	1	1	0.0450741	1
Head	1	1.01	0.0710538	1
Head	1	1.02	0.0201598	1
Head	1	1.03	0.0295816	1
Head	1	1.04	0.0687596	1
Head	1	1.05	0.064624	1
Head	1	1.06	0.0453247	1
Head	1	1.07	0.0461284	1
Head	1	1.08	0.0617256	1
Head	1	1.09	0.0545378	1
Head	1	1.1	0.0150373	1
Head	1	1.11	0.0524906	1
Head	1	1.12	0.0552011	1
Head	1	1.13	0.028035	1
Head	1	1.14	0.0290399	1
Head	1	1.15	0.00475333	1
Head	1	1.16	0.028624	1
Head	1	1.17	0.0261966	1
Head	1	1.18	0.0181507	1
Head	1	1.19	0.0395485	1
Head	1	1.2	0.0293579	1
Head	1	1.21	0.0420259	1
Head	1	1.22	0.0180672	1
Head	1	1.23	0.0358407	1
Head	1	1.24	0.00535416	1
Head	1	1.25	0.0319965	1
Head	1	1.26	-0.00189629	1
Head	1	1.27	-0.00420042	1
Head	1	1.28	0.0308358	1
Head	1	1.29	-0.0054307	1
Head	1	1.3	0.00615125	1
Head	1	1.31	-0.00344891	1
Head	1	1.32	0.024616	1
Head	1	1.33	0.0105839	1
Head	1	1.34	0.0325548	1
Head	1	1.35	-0.0344701	1
Head	1	1.36	-0.00257517	1
Head	1	1.37	-0.0108433	1
Head	1	1.38	0.0225662	1
Head	1	1.39	-0.00116198	1
Head	1	1.4	0.0237148	1
Head	1	1.41	0.0216885	1
Head	1	1.42	0.0239838	1
Head	1	1.43	-0.0091442	1
Head	1	1.44	0.0204061	1
Head	1	1.45	0.00160754	1
Head	1	1.46	0.0120358	1
Head	1	1.47	-0.0124976	1
Head	1	1.48	0.0135038	1
Head	1	1.49	-0.0617266	1
Head	1	1.5	-0.0479523	1
Head	1	1.51	0.00379211	1
Head	1	1.52	0.0183317	1
Head	1	1.53	0.0172725	1
Head	1	1.54	-0.022375	1
Head	1	1.55	0.00411465	1
Head	1	1.56	-0.0294168	1
Head	1	1.57	-0.0207279	1
Head	1	1.58	-0.0171964	1
Head	1	1.59	0.0167423	1
Head	1	1.6	0.000251453	1
Head	1	1.61	-0.0154133	1
Head	1	1.62	-0.0473761	1
Head	1	1.63	-0.0448036	1
Head	1	1.64	-0.00625084	1
Head	1	1.65	-0.0137087	1
Head	1	1.66	-0.0116227	1
Head	1	1.67	0.00672963	1
Head	1	1.68	-0.00740822	1
Head	1	1.69	0.00395119	1
Head	1	1.7	-0.00245721	1
Head	1	1.71	0.0128186	1
Head	1	1.72	-0.0225105	1
Head	1	1.73	-0.0555992	1
Head	1	1.74	-0.00360478	1
Head	1	1.75	0.00246705	1
Head	1	1.76	-0.000967719	1
Head	1	1.77	-0.0211928	1
Head	1	1.78	-0.000995794	1
Head	1	1.79	0.00728205	1
Head	1	1.8	-0.0328137	1
Head	1	1.81	-0.0154096	1
Head	1	1.82	-0.0177959	1
Head	1	1.83	-0.00611109	1
Head	1	1.84	-0.0187581	1
Head	1	1.85	0.00369509	1
Head	1	1.86	0.00247187	1
Head	1	1.87	-0.0155356	1
Head	1	1.88	-0.0539755	1
Head	1	1.89	9.54098e-05	1
Head	1	1.9	0.00626684	1
Head	1	1.91	0.00571008	1
Head	1	1.92	-0.0101158	1
Head	1	1.93	-0.0261659	1
Head	1	1.94	-0.0736437	1
Head	1	1.95	-0.0124133	1
Head	1	1.96	-0.0301141	1
Head	1	1.97	0.00520662	1
Head	1	1.98	0.00413514	1
Head	1	1.99	-0.00115772	1
Head	1	2	0.00591213	1
Head	1	2.01	-0.0329037	1
Head	1	2.02	0.00200843	1
Head	1	2.03	-0.0366679	1
Head	1	2.04	-0.02027	1
Head	1	2.05	-0.0219042	1
Head	1	2.06	-0.00656952	1
Head	1	2.07	-0.0175082	1
Head	1	2.08	-0.0569279	1
Head	1	2.09	-0.0104081	1
Head	1	2.1	-0.0230622	1
Head	1	2.11	-0.0374753	1
Head	1	2.12	-0.0264998	1
Head	1	2.13	0.00406868	1
Head	1	2.14	-0.018045	1
Head	1	2.15	-0.0331537	1
Head	1	2.16	-0.0487893	1
Head	1	2.17	-0.00990974	1
Head	1	2.18	-0.0160779	1
Head	1	2.19	-0.0164561	1
Head	1	2.2	-0.00424484	1
Head	1	2.21	-0.00336295	1
Head	1	2.22	-0.0244707	1
Head	1	2.23	-0.0204377	1
Head	1	2.24	-0.00388935	1
Head	1	2.25	-0.035542	1
Head	1	2.26	-0.00708853	1
Head	1	2.27	-0.0511872	1
Head	1	2.28	-0.00583792	1
Head	1	2.29	-0.0372505	1
Head	1	2.3	-0.0161201	1
Head	1	2.31	-0.0287509	1
Head	1	2.32	-0.020944	1
Head	1	2.33	-0.0309517	1
Head	1	2.34	-0.0106689	1
Head	1	2.35	-0.0219247	1
Head	1	2.36	-0.00235604	1
Head	1	2.37	-0.0163712	1
Head	1	2.38	-0.0136377	1
Head	1	2.39	-0.0135288	1
Head	1	2.4	-0.0180412	1
Head	1	2.41	-0.0188381	1
Head	1	2.42	-0.00123157	1
Head	1	2.43	-0.000450819	1
Head	1	2.44	-0.0360426	1
Head	1	2.45	-0.0279886	1
Head	1	2.46	-0.0187567	1
Head	1	2.47	-0.0487439	1
Head	1	2.48	0.000701282	1
Head	1	2.49	-0.020459	1
Head	1	2.5	-0.0420265	1
Head	1	2.51	-0.00113674	1
Head	1	2.52	0.00181799	1
Head	1	2.53	-0.0226186	1
Head	1	2.54	-0.0300718	1
Head	1	2.55	-0.0152577	1
Head	1	2.56	-0.0725811	1
Head	1	2.57	0.00143744	1
Head	1	2.58	-0.0168783	1
Head	1	2.59	-0.0101813	1
Head	1	2.6	-0.0578012	1
Head	1	2.61	-0.0704661	1
Head	1	2.62	-0.0320834	1
Head	1	2.63	-0.00848816	1
Head	1	2.64	-0.0334763	1
Head	1	2.65	-0.0550075	1
Head	1	2.66	-0.0233381	1
Head	1	2.67	-0.00351826	1
Head	1	2.68	0.000351024	1
Head	1	2.69	-0.00629679	1
Head	1	2.7	-0.012729	1
Head	1	2.71	-0.00096704	1
Head	1	2.72	-0.0123615	1
Head	1	2.73	-0.000191687	1
Head	1	2.74	-0.00185254	1
Head	1	2.75	-0.0208786	1
Head	1	2.76	-0.0450247	1
Head	1	2.77	-0.0178449	1
Head	1	2.78	-0.00875127	1
Head	1	2.79	-0.0195442	1
Head	1	2.8	-0.0446093	1
Head	1	2.81	-0.0183085	1
Head	1	2.82	-0.0347485	1
Head	1	2.83	-0.00138294	1
Head	1	2.84	-0.0648655	1
Head	1	2.85	-0.0482187	1
Head	1	2.86	-0.0475717	1
Head	1	2.87	-0.0328084	1
Head	1	2.88	-0.00109092	1
Head	1	2.89	-0.00799795	1
Head	1	2.9	-0.0118091	1
Head	1	2.91	-0.000213471	1
Head	1	2.92	-0.0394219	1
Head	1	2.93	-0.0158617	1
Head	1	2.94	-0.0277902	1
Head	1	2.95	-0.000650642	1
Head	1	2.96	-0.0317673	1
Head	1	2.97	-0.00920449	1
Head	1	2.98	-0.0128689	1
Head	1	2.99	-0.00603667	1
Head	1	3	-0.0136142	1
Head	1	3.01	-0.00906659	1
Head	1	3.02	-0.0412485	1
Head	1	3.03	-0.00774053	1
Head	1	3.04	-0.0239638	1
Head	1	3.05	-0.0372624	1
Head	1	3.06	-0.0331594	1
Head	1	3.07	-0.00587713	1
Head	1	3.08	-0.0398141	1
Head	1	3.09	-0.0236549	1
Head	1	3.1	0.00032974	1
Head	1	3.11	-0.00772465	1
Head	1	3.12	-0.0175931	1
Head	1	3.13	-0.0181174	1
Head	1	3.14	-0.0500361	1
Head	1	3.15	-0.0056068	1
Head	1	3.16	-0.00511968	1
Head	1	3.17	-0.0552607	1
Head	1	3.18	-0.038441	1
Head	1	3.19	-0.0148399	1
Head	1	3.2	-0.0213002	1
Head	1	3.21	-0.0125441	1
Head	1	3.22	0.000143366	1
Head	1	3.23	-0.00619755	1
Head	1	3.24	-0.0313416	1
Head	1	3.25	-0.0556735	1
Head	1	3.26	-0.0269647	1
Head	1	3.27	-0.0218166	1
Head	1	3.28	-0.0160027	1
Head	1	3.29	-0.0215844	1
Head	1	3.3	-0.0628071	1
Head	1	3.31	-0.0659589	1
Head	1	3.32	-0.0502802	1
Head	1	3.33	-0.0442129	1
Head	1	3.34	-0.0335724	1
Head	1	3.35	-0.0318022	1
Head	1	3.36	-0.00675202	1
Head	1	3.37	-0.000350673	1
Head	1	3.38	-0.00583656	1
Head	1	3.39	-0.027142	1
Head	1	3.4	-0.00405173	1
Head	1	3.41	-0.022372	1
Head	1	3.42	-0.00181515	1
Head	1	3.43	-0.0181765	1
Head	1	3.44	-0.0335515	1
Head	1	3.45	-0.0282233	1
Head	1	3.46	-0.0153506	1
Head	1	3.47	-0.0115613	1
Head	1	3.48	-0.0376753	1
Head	1	3.49	-0.0126473	1
Head	1	3.5	-0.0208037	1
Head	1	3.51	-0.0109673	1
Head	1	3.52	-0.0245518	1
Head	1	3.53	-0.0353193	1
Head	1	3.54	-0.0112998	1
Head	1	3.55	-0.02172	1
Head	1	3.56	-0.00163921	1
Head	1	3.57	-0.00214226	1
Head	1	3.58	-0.00823729	1
Head	1	3.59	-0.0178538	1
Head	1	3.6	-0.0248541	1
Head	1	3.61	-0.0109221	1
Head	1	3.62	-0.0435949	1
Head	1	3.63	-0.00448441	1
Head	1	3.64	-0.0405349	1
Head	1	3.65	-0.0153168	1
Head	1	3.66	-0.0283007	1
Head	1	3.67	-0.0284223	1
Head	1	3.68	-0.00551944	1
Head	1	3.69	-0.0403071	1
Head	1	3.7	-0.0358141	1
Head	1	3.71	-0.00830891	1
Head	1	3.72	-0.0274605	1
Head	1	3.73	-0.00669003	1
Head	1	3.74	-0.0237157	1
Head	1	3.75	-0.0156527	1
Head	1	3.76	-0.0199642	1
Head	1	3.77	-0.00478634	1
Head	1	3.78	-0.0276355	1
Head	1	3.79	-0.0555498	1
Head	1	3.8	-0.00209262	1
Head	1	3.81	-0.00794172	1
Head	1	3.82	-0.0164506	1
Head	1	3.83	-0.032535	1
Head	1	3.84	-0.053694	1
Head	1	3.85	-0.0168256	1
Head	1	3.86	-0.061623	1
Head	1	3.87	-0.043346	1
Head	1	3.88	-0.0510532	1
Head	1	3.89	-0.0223747	1
Head	1	3.9	-0.0233298	1
Head	1	3.91	-0.0274488	1
Head	1	3.92	-0.026363	1
Head	1	3.93	-0.0106042	1
Head	1	3.94	-0.0166158	1
Head	1	3.95	-0.00764093	1
Head	1	3.96	-0.0139727	1
Head	1	3.97	-0.0364017	1
Head	1	3.98	-0.0369415	1
Head	1	3.99	-0.0149671	1
Head	1	4	-0.0319266	1
Head	1	0	0.876114	2
Head	1	0.01	0.856496	2
Head	1	0.02	0.778875	2
Head	1	0.03	0.814919	2
Head	1	0.04	0.751788	2
Head	1	0.05	0.764783	2
Head	1	0.06	0.746927	2
Head	1	0.07	0.708632	2
Head	1	0.08	0.720302	2
Head	1	0.09	0.666613	2
Head	1	0.1	0.668013	2
Head	1	0.11	0.635529	2
Head	1	0.12	0.606183	2
Head	1	0.13	0.590393	2
Head	1	0.14	0.586184	2
Head	1	0.15	0.590979	2
Head	1	0.16	0.575395	2
Head	1	0.17	0.550456	2
Head	1	0.18	0.557057	2
Head	1	0.19	0.491704	2
Head	1	0.2	0.527738	2
Head	1	0.21	0.496878	2
Head	1	0.22	0.463181	2
Head	1	0.23	0.454472	2
Head	1	0.24	0.480345	2
Head	1	0.25	0.467144	2
Head	1	0.26	0.451278	2
Head	1	0.27	0.43374	2
Head	1	0.28	0.420863	2
Head	1	0.29	0.390795	2
Head	1	0.3	0.391158	2
Head	1	0.31	0.395571	2
Head	1	0.32	0.356536	2
Head	1	0.33	0.342478	2
Head	1	0.34	0.36985	2
Head	1	0.35	0.314497	2
Head	1	0.36	0.343055	2
Head	1	0.37	0.309276	2
Head	1	0.38	0.311783	2
Head	1	0.39	0.275953	2
Head	1	0.4	0.30035	2
Head	1	0.41	0.297103	2
Head	1	0.42	0.244106	2
Head	1	0.43	0.250868	2
Head	1	0.44	0.273996	2
Head	1	0.45	0.240033	2
Head	1	0.46	0.255442	2
Head	1	0.47	0.239604	2
Head	1	0.48	0.257053	2
Head	1	0.49	0.252931	2
Head	1	0.5	0.247508	2
Head	1	0.51	0.234854	2
Head	1	0.52	0.218079	2
Head	1	0.53	0.229447	2
Head	1	0.54	0.16566	2
Head	1	0.55	0.166148	2
Head	1	0.56	0.148737	2
Head	1	0.57	0.190813	2
Head	1	0.58	0.200456	2
Head	1	0.59	0.171568	2
Head	1	0.6	0.149115	2
Head	1	0.61	0.171354	2
Head	1	0.62	0.161634	2
Head	1	0.63	0.163818	2
Head	1	0.64	0.164515	2
Head	1	0.65	0.103925	2
Head	1	0.66	0.144786	2
Head	1	0.67	0.128374	2
Head	1	0.68	0.115913	2
Head	1	0.69	0.109807	2
Head	1	0.7	0.136396	2
Head	1	0.71	0.139521	2
Head	1	0.72	0.130353	2
Head	1	0.73	0.106333	2
Head	1	0.74	0.116065	2
Head	1	0.75	0.1118	2
Head	1	0.76	0.096176	2
Head	1	0.77	0.108997	2
Head	1	0.78	0.118149	2
Head	1	0.79	0.118288	2
Head	1	0.8	0.0750577	2
Head	1	0.81	0.104667	2
Head	1	0.82	0.0973794	2
Head	1	0.83	0.108196	2
Head	1	0.84	0.0910134	2
Head	1	0.85	0.0977058	2
Head	1	0.86	0.078324	2
Head	1	0.87	0.0890574	2
Head	1	0.88	0.0769521	2
Head	1	0.89	0.0485535	2
Head	1	0.9	0.0443716	2
Head	1	0.91	0.0765338	2
Head	1	0.92	0.0638	2
Head	1	0.93	0.0783748	2
Head	1	0.94	0.0821341	2
Head	1	0.95	0.0746015	2
Head	1	0.96	0.0474976	2
Head	1	0.97	0.0568747	2
Head	1	0.98	0.0281486	2
Head	1	0.99	0.0557356	2
Head	1	1	0.0353387	2
Head	1	1.01	0.0675819	2
Head	1	1.02	0.00995616	2
Head	1	1.03	0.0558555	2
Head	1	1.04	0.0484777	2
Head	1	1.05	0.0406915	2
Head	1	1.06	0.0174579	2
Head	1	1.07	0.0476603	2
Head	1	1.08	0.0242561	2
Head	1	1.09	0.030638	2
Head	1	1.1	-0.00799305	2
Head	1	1.11	0.0499117	2
Head	1	1.12	0.0188789	2
Head	1	1.13	0.0316936	2
Head	1	1.14	0.0480297	2
Head	1	1.15	0.0226171	2
Head	1	1.16	0.0167264	2
Head	1	1.17	0.0315949	2
Head	1	1.18	0.0097763	2
Head	1	1.19	0.0231016	2
Head	1	1.2	0.034565	2
Head	1	1.21	-0.00446658	2
Head	1	1.22	0.00307441	2
Head	1	1.23	0.0159739	2
Head	1	1.24	-0.0227295	2
Head	1	1.25	0.00356853	2
Head	1	1.26	-0.021161	2
Head	1	1.27	0.00671411	2
Head	1	1.28	-0.0140528	2
Head	1	1.29	0.00589444	2
Head	1	1.3	0.0103416	2
Head	1	1.31	-0.00368704	2
Head	1	1.32	0.0132817	2
Head	1	1.33	0.0043297	2
Head	1	1.34	0.0177658	2
Head	1	1.35	0.0199501	2
Head	1	1.36	-0.0191903	2
Head	1	1.37	0.0188042	2
Head	1	1.38	0.0175551	2
Head	1	1.39	0.00844975	2
Head	1	1.4	-0.00691639	2
Head	1	1.41	0.0233973	2
Head	1	1.42	0.0060383	2
Head	1	1.43	0.0159179	2
Head	1	1.44	0.00676257	2
Head	1	1.45	0.020604	2
Head	1	1.46	-0.0105365	2
Head	1	1.47	0.00321927	2
Head	1	1.48	0.0121577	2
Head	1	1.49	0.0150322	2
Head	1	1.5	-0.0206896	2
Head	1	1.51	-0.00414953	2
Head	1	1.52	0.0175877	2
Head	1	1.53	-0.0279605	2
Head	1	1.54	-0.0289485	2
Head	1	1.55	-0.0150962	2
Head	1	1.56	0.0169563	2
Head	1	1.57	0.00850086	2
Head	1	1.58	0.011834	2
Head	1	1.59	0.00464109	2
Head	1	1.6	-0.0223505	2
Head	1	1.61	-0.00957023	2
Head	1	1.62	-0.0600014	2
Head	1	1.63	0.00741174	2
Head	1	1.64	-0.0131965	2
Head	1	1.65	-0.0239383	2
Head	1	1.66	-0.00197042	2
Head	1	1.67	0.00932295	2
Head	1	1.68	-0.0459513	2
Head	1	1.69	-0.0277113	2
Head	1	1.7	-0.00137308	2
Head	1	1.71	0.00869959	2
Head	1	1.72	-0.0101023	2
Head	1	1.73	0.00811957	2
Head	1	1.74	-0.0126384	2
Head	1	1.75	-0.0141433	2
Head	1	1.76	-0.0135585	2
Head	1	1.77	-0.00589536	2
Head	1	1.78	0.0069078	2
Head	1	1.79	0.00766398	2
Head	1	1.8	-0.00676708	2
Head	1	1.81	-0.00853369	2
Head	1	1.82	-0.0379289	2
Head	1	1.83	-0.00881128	2
Head	1	1.84	-0.028918	2
Head	1	1.85	-0.031453	2
Head	1	1.86	-0.0524399	2
Head	1	1.87	-0.000792737	2
Head	1	1.88	-0.0360233	2
Head	1	1.89	0.00266797	2
Head	1	1.9	0.00716955	2
Head	1	1.91	-0.00138607	2
Head	1	1.92	-0.0446219	2
Head	1	1.93	-0.0239867	2
Head	1	1.94	-0.0175624	2
Head	1	1.95	-0.00207893	2
Head	1	1.96	-0.0282763	2
Head	1	1.97	-0.0445565	2
Head	1	1.98	-0.0204248	2
Head	1	1.99	-0.0259234	2
Head	1	2	-0.0360869	2
Head	1	2.01	-0.0237089	2
Head	1	2.02	-0.0272882	2
Head	1	2.03	-0.0101129	2
Head	1	2.04	-0.0116889	2
Head	1	2.05	-0.0436716	2
Head	1	2.06	-0.0407783	2
Head	1	2.07	-0.00317442	2
Head	1	2.08	-0.00754426	2
Head	1	2.09	-0.0472538	2
Head	1	2.1	-0.0186868	2
Head	1	2.11	-0.00227214	2
Head	1	2.12	-0.0189493	2
Head	1	2.13	-0.0139831	2
Head	1	2.14	-0.0409616	2
Head	1	2.15	-0.00721464	2
Head	1	2.16	-0.00449611	2
Head	1	2.17	-0.0118765	2
Head	1	2.18	-0.0218443	2
Head	1	2.19	-0.0266564	2
Head	1	2.2	-0.00291665	2
Head	1	2.21	-0.0230604	2
Head	1	2.22	-0.0326859	2
Head	1	2.23	-0.00563355	2
Head	1	2.24	-0.0121806	2
Head	1	2.25	-0.0357379	2
Head	1	2.26	-0.0553779	2
Head	1	2.27	-0.0233332	2
Head	1	2.28	-0.00349367	2
Head	1	2.29	-0.0528408	2
Head	1	2.3	-0.0281681	2
Head	1	2.31	-0.00650235	2
Head	1	2.32	-0.0198154	2
Head	1	2.33	-0.0172399	2
Head	1	2.34	-0.0072508	2
Head	1	2.35	-0.0157364	2
Head	1	2.36	-0.0442605	2
Head	1	2.37	-0.0416437	2
Head	1	2.38	-0.0067263	2
Head	1	2.39	-0.0317628	2
Head	1	2.4	-0.0162063	2
Head	1	2.41	-0.0189443	2
Head	1	2.42	-0.012876	2
Head	1	2.43	-0.00435445	2
Head	1	2.44	-0.00412605	2
Head	1	2.45	-0.0268783	2
Head	1	2.46	-0.00694446	2
Head	1	2.47	-0.0099989	2
Head	1	2.48	-0.0123689	2
Head	1	2.49	-0.00125403	2
Head	1	2.5	-0.00248712	2
Head	1	2.51	-0.0289985	2
Head	1	2.52	0.00011058	2
Head	1	2.53	-0.0182831	2
Head	1	2.54	0.00059455	2
Head	1	2.55	-0.0409868	2
Head	1	2.56	-0.00594353	2
Head	1	2.57	-0.0337654	2
Head	1	2.58	-0.0188549	2
Head	1	2.59	-0.0026472	2
Head	1	2.6	-0.0188163	2
Head	1	2.61	-0.0412425	2
Head	1	2.62	-0.0281943	2
Head	1	2.63	-0.0210076	2
Head	1	2.64	-0.00316519	2
Head	1	2.65	-0.0502566	2
Head	1	2.66	-0.00111546	2
Head	1	2.67	-0.0164555	2
Head	1	2.68	-0.0373253	2
Head	1	2.69	-0.00803708	2
Head	1	2.7	-0.0138797	2
Head	1	2.71	-0.00193078	2
Head	1	2.72	-0.0360556	2
Head	1	2.73	-0.0149907	2
Head	1	2.74	-0.0392371	2
Head	1	2.75	-0.0248508	2
Head	1	2.76	-0.0220039	2
Head	1	2.77	-0.0228771	2
Head	1	2.78	-0.0264712	2
Head	1	2.79	-0.00857135	2
Head	1	2.8	-0.00944048	2
Head	1	2.81	-3.87627e-05	2
Head	1	2.82	-0.0185734	2
Head	1	2.83	-0.0626492	2
Head	1	2.84	-0.0238259	2
Head	1	2.85	-0.012331	2
Head	1	2.86	-0.0167804	2
Head	1	2.87	-0.0447971	2
Head	1	2.88	-0.0263062	2
Head	1	2.89	-0.0135219	2
Head	1	2.9	-0.0434037	2
Head	1	2.91	-0.00861254	2
Head	1	2.92	-0.0296998	2
Head	1	2.93	-0.0152407	2
Head	1	2.94	-0.016218	2
Head	1	2.95	-0.0290425	2
Head	1	2.96	-0.0699654	2
Head	1	2.97	-0.0298075	2
Head	1	2.98	-0.0435456	2
Head	1	2.99	-0.0344578	2
Head	1	3	-0.0024742	2
Head	1	3.01	-0.0514998	2
Head	1	3.02	-0.0308436	2
Head	1	3.03	-0.021183	2
Head	1	3.04	-0.0283166	2
Head	1	3.05	-0.0530951	2
Head	1	3.06	-0.0444393	2
Head	1	3.07	-0.0541806	2
Head	1	3.08	-0.00925622	2
Head	1	3.09	-0.0307713	2
Head	1	3.1	-0.039215	2
Head	1	3.11	-0.0202626	2
Head	1	3.12	-0.0351336	2
Head	1	3.13	-0.0252603	2
Head	1	3.14	-0.0235188	2
Head	1	3.15	-0.02695	2
Head	1	3.16	-0.00172025	2
Head	1	3.17	-0.0318996	2
Head	1	3.18	-0.0156135	2
Head	1	3.19	-0.0333212	2
Head	1	3.2	-0.0134142	2
Head	1	3.21	-0.0291356	2
Head	1	3.22	-0.0588275	2
Head	1	3.23	-0.0242631	2
Head	1	3.24	-0.0253701	2
Head	1	3.25	-0.030448	2
Head	1	3.26	-0.038778	2
Head	1	3.27	-0.0519605	2
Head	1	3.28	-0.0355735	2
Head	1	3.29	-0.0233915	2
Head	1	3.3	-0.0147958	2
Head	1	3.31	-0.0463272	2
Head	1	3.32	-0.00673328	2
Head	1	3.33	-0.0433887	2
Head	1	3.34	-0.062666	2
Head	1	3.35	-0.0474982	2
Head	1	3.36	-0.0714099	2
Head	1	3.37	-0.0233552	2
Head	1	3.38	-0.0437404	2
Head	1	3.39	-0.0222334	2
Head	1	3.4	-0.030716	2
Head	1	3.41	-0.0124952	2
Head	1	3.42	-0.0211928	2
Head	1	3.43	-0.00371054	2
Head	1	3.44	-0.0432438	2
Head	1	3.45	-0.0269983	2
Head	1	3.46	-0.0312959	2
Head	1	3.47	-0.014257	2
Head	1	3.48	-0.00962104	2
Head	1	3.49	-0.0311768	2
Head	1	3.5	-0.0336411	2
Head	1	3.51	-0.00405881	2
Head	1	3.52	-0.00685754	2
Head	1	3.53	-0.0211324	2
Head	1	3.54	-0.0269523	2
Head	1	3.55	-0.0120482	2
Head	1	3.56	-0.0405229	2
Head	1	3.57	-0.0801082	2
Head	1	3.58	-0.00702149	2
Head	1	3.59	-0.00851388	2
Head	1	3.6	-0.000708146	2
Head	1	3.61	-0.0424281	2
Head	1	3.62	-0.0584469	2
Head	1	3.63	-0.0127099	2
Head	1	3.64	-0.00752949	2
Head	1	3.65	-0.0348204	2
Head	1	3.66	-0.0144655	2
Head	1	3.67	-0.0109383	2
Head	1	3.68	-0.00576989	2
Head	1	3.69	-0.03544	2
Head	1	3.7	-0.0328117	2
Head	1	3.71	-0.0236846	2
Head	1	3.72	-0.0398563	2
Head	1	3.73	-0.0189129	2
Head	1	3.74	-0.00539513	2
Head	1	3.75	-0.0275578	2
Head	1	3.76	-0.0607228	2
Head	1	3.77	-0.0396894	2
Head	1	3.78	-0.0312634	2
Head	1	3.79	-0.0099219	2
Head	1	3.8	-0.0199536	2
Head	1	3.81	-0.00432334	2
Head	1	3.82	-0.0440668	2
Head	1	3.83	-0.00966249	2
Head	1	3.84	-0.0617511	2
Head	1	3.85	-0.0261264	2
Head	1	3.86	-0.0259007	2
Head	1	3.87	-0.0260103	2
Head	1	3.88	-0.0466699	2
Head	1	3.89	-0.0146871	2
Head	1	3.9	-0.000440825	2
Head	1	3.91	-0.0278757	2
Head	1	3.92	-0.0444562	2
Head	1	3.93	-0.0106492	2
Head	1	3.94	-0.0365385	2
Head	1	3.95	-0.0586481	2
Head	1	3.96	-0.031806	2
Head	1	3.97	-0.0495673	2
Head	1	3.98	-0.0110999	2
Head	1	3.99	-0.0544369	2
Head	1	4	-0.0318684	2
Head	1	0	0.808155	3
Head	1	0.01	0.852883	3
Head	1	0.02	0.80518	3
Head	1	0.03	0.806108	3
Head	1	0.04	0.787275	3
Head	1	0.05	0.701192	3
Head	1	0.06	0.742204	3
Head	1	0.07	0.711911	3
Head	1	0.08	0.661904	3
Head	1	0.09	0.66176	3
Head	1	0.1	0.67231	3
Head	1	0.11	0.628033	3
Head	1	0.12	0.635631	3
Head	1	0.13	0.61462	3
Head	1	0.14	0.596955	3
Head	1	0.15	0.544233	3
Head	1	0.16	0.567395	3
Head	1	0.17	0.566241	3
Head	1	0.18	0.551372	3
Head	1	0.19	0.533445	3
Head	1	0.2	0.521933	3
Head	1	0.21	0.489433	3
Head	1	0.22	0.471843	3
Head	1	0.23	0.475814	3
Head	1	0.24	0.472035	3
Head	1	0.25	0.458686	3
Head	1	0.26	0.398106	3
Head	1	0.27	0.43666	3
Head	1	0.28	0.414194	3
Head	1	0.29	0.389386	3
Head	1	0.3	0.375782	3
Head	1	0.31	0.389986	3
Head	1	0.32	0.384777	3
Head	1	0.33	0.359423	3
Head	1	0.34	0.358816	3
Head	1	0.35	0.348867	3
Head	1	0.36	0.332029	3
Head	1	0.37	0.333841	3
Head	1	0.38	0.331678	3
Head	1	0.39	0.279587	3
Head	1	0.4	0.238673	3
Head	1	0.41	0.281708	3
Head	1	0.42	0.259289	3
Head	1	0.43	0.258741	3
Head	1	0.44	0.260779	3
Head	1	0.45	0.26854	3
Head	1	0.46	0.262178	3
Head	1	0.47	0.255784	3
Head	1	0.48	0.226003	3
Head	1	0.49	0.230129	3
Head	1	0.5	0.229492	3
Head	1	0.51	0.223681	3
Head	1	0.52	0.201571	3
Head	1	0.53	0.16286	3
Head	1	0.54	0.178945	3
Head	1	0.55	0.182474	3
Head	1	0.56	0.200352	3
Head	1	0.57	0.166959	3
Head	1	0.58	0.1804	3
Head	1	0.59	0.166752	3
Head	1	0.6	0.16471	3
Head	1	0.61	0.174983	3
Head	1	0.62	0.145197	3
Head	1	0.63	0.164684	3
Head	1	0.64	0.12536	3
Head	1	0.65	0.119494	3
Head	1	0.66	0.13006	3
Head	1	0.67	0.142267	3
Head	1	0.68	0.129631	3
Head	1	0.69	0.126378	3
Head	1	0.7	0.127374	3
Head	1	0.71	0.122666	3
Head	1	0.72	0.120602	3
Head	1	0.73	0.135994	3
Head	1	0.74	0.108911	3
Head	1	0.75	0.115456	3
Head	1	0.76	0.104501	3
Head	1	0.77	0.113313	3
Head	1	0.78	0.0892646	3
Head	1	0.79	0.0977163	3
Head	1	0.8	0.105509	3
Head	1	0.81	0.062244	3
Head	1	0.82	0.103784	3
Head	1	0.83	0.0844701	3
Head	1	0.84	0.100711	3
Head	1	0.85	0.0776117	3
Head	1	0.86	0.0846957	3
Head	1	0.87	0.0617986	3
Head	1	0.88	0.0444554	3
Head	1	0.89	0.0497086	3
Head	1	0.9	0.0266869	3
Head	1	0.91	0.0460523	3
Head	1	0.92	0.034163	3
Head	1	0.93	0.0663819	3
Head	1	0.94	0.0454245	3
Head	1	0.95	-0.00254322	3
Head	1	0.96	0.0656394	3
Head	1	0.97	0.057103	3
Head	1	0.98	0.0473164	3
Head	1	0.99	0.0266267	3
Head	1	1	0.0348945	3
Head	1	1.01	0.0568485	3
Head	1	1.02	0.0646789	3
Head	1	1.03	0.0588218	3
Head	1	1.04	0.0377133	3
Head	1	1.05	0.0268806	3
Head	1	1.06	0.029466	3
Head	1	1.07	0.0374364	3
Head	1	1.08	0.0287495	3
Head	1	1.09	0.0527357	3
Head	1	1.1	0.0298004	3
Head	1	1.11	0.0508	3
Head	1	1.12	0.0474361	3
Head	1	1.13	0.0362332	3
Head	1	1.14	0.00172563	3
Head	1	1.15	0.044004	3
Head	1	1.16	0.00889843	3
Head	1	1.17	-0.0700481	3
Head	1	1.18	0.0326764	3
Head	1	1.19	0.0189839	3
Head	1	1.2	0.0108456	3
Head	1	1.21	0.0374373	3
Head	1	1.22	-0.00414809	3
Head	1	1.23	-0.00184845	3
Head	1	1.24	0.0193535	3
Head	1	1.25	0.0218469	3
Head	1	1.26	0.0135109	3
Head	1	1.27	0.0339482	3
Head	1	1.28	0.0171885	3
Head	1	1.29	0.0151299	3
Head	1	1.3	1.69896e-05	3
Head	1	1.31	-0.0102819	3
Head	1	1.32	0.0174542	3
Head	1	1.33	0.00423652	3
Head	1	1.34	0.00900856	3
Head	1	1.35	0.0219101	3
Head	1	1.36	0.0237235	3
Head	1	1.37	0.0203962	3
Head	1	1.38	0.0119686	3
Head	1	1.39	-0.0298374	3
Head	1	1.4	-0.0040055	3
Head	1	1.41	-0.00599447	3
Head	1	1.42	0.0231254	3
Head	1	1.43	0.000806581	3
Head	1	1.44	-0.00321336	3
Head	1	1.45	0.00322438	3
Head	1	1.46	0.016548	3
Head	1	1.47	0.0148946	3
Head	1	1.48	-0.00867764	3
Head	1	1.49	-0.0114711	3
Head	1	1.5	-0.00962746	3
Head	1	1.51	-0.0103676	3
Head	1	1.52	0.00646392	3
Head	1	1.53	0.0115446	3
Head	1	1.54	0.0130351	3
Head	1	1.55	0.0127598	3
Head	1	1.56	-0.003743	3
Head	1	1.57	-0.00443824	3
Head	1	1.58	0.00377066	3
Head	1	1.59	-0.0510285	3
Head	1	1.6	-0.0421308	3
Head	1	1.61	-0.0330291	3
Head	1	1.62	-0.0109073	3
Head	1	1.63	0.00935763	3
Head	1	1.64	-0.00959267	3
Head	1	1.65	-0.0334566	3
Head	1	1.66	-0.0294874	3
Head	1	1.67	-0.026151	3
Head	1	1.68	-0.0241938	3
Head	1	1.69	0.000900837	3
Head	1	1.7	0.00198484	3
Head	1	1.71	-0.0152704	3
Head	1	1.72	-0.00111519	3
Head	1	1.73	0.00849586	3
Head	1	1.74	-0.00697789	3
Head	1	1.75	-0.0118421	3
Head	1	1.76	-0.0024233	3
Head	1	1.77	0.00288649	3
Head	1	1.78	-0.00572592	3
Head	1	1.79	-0.0180115	3
Head	1	1.8	-0.0318128	3
Head	1	1.81	0.00416201	3
Head	1	1.82	-0.0209605	3
Head	1	1.83	-0.00527714	3
Head	1	1.84	-0.0118961	3
Head	1	1.85	-0.0492716	3
Head	1	1.86	-0.0388033	3
Head	1	1.87	-0.0337964	3
Head	1	1.88	-0.0504035	3
Head	1	1.89	-0.0694017	3
Head	1	1.9	-0.00168037	3
Head	1	1.91	0.00148968	3
Head	1	1.92	0.00611574	3
Head	1	1.93	-0.00484318	3
Head	1	1.94	0.00151247	3
Head	1	1.95	-0.0286354	3
Head	1	1.96	-0.00898978	3
Head	1	1.97	-0.00194369	3
Head	1	1.98	-0.00497883	3
Head	1	1.99	-0.0482379	3
Head	1	2	-0.039445	3
Head	1	2.01	-0.000685532	3
Head	1	2.02	0.00115056	3
Head	1	2.03	-0.0120558	3
Head	1	2.04	-0.0241152	3
Head	1	2.05	-0.0396224	3
Head	1	2.06	-0.0140124	3
Head	1	2.07	-0.0305642	3
Head	1	2.08	-0.0385483	3
Head	1	2.09	-0.0210033	3
Head	1	2.1	0.00358895	3
Head	1	2.11	-0.0129117	3
Head	1	2.12	-0.0134202	3
Head	1	2.13	-0.0279695	3
Head	1	2.14	-0.0258683	3
Head	1	2.15	-0.00512565	3
Head	1	2.16	-0.0200584	3
Head	1	2.17	-0.0311118	3
Head	1	2.18	-0.0326725	3
Head	1	2.19	0.000394268	3
Head	1	2.2	-0.0201407	3
Head	1	2.21	-0.00233614	3
Head	1	2.22	-0.0018297	3
Head	1	2.23	-0.0442224	3
Head	1	2.24	-0.0249967	3
Head	1	2.25	-0.00905761	3
Head	1	2.26	-0.0533463	3
Head	1	2.27	-0.0448512	3
Head	1	2.28	-0.0374213	3
Head	1	2.29	-0.00508244	3
Head	1	2.3	-0.0198734	3
Head	1	2.31	-0.0122666	3
Head	1	2.32	-0.0159073	3
Head	1	2.33	-0.0186511	3
Head	1	2.34	-0.0104649	3
Head	1	2.35	-0.0849483	3
Head	1	2.36	-0.00772237	3
Head	1	2.37	-0.0130695	3
Head	1	2.38	-0.00599356	3
Head	1	2.39	-0.0212249	3
Head	1	2.4	-0.0457588	3
Head	1	2.41	-0.0151042	3
Head	1	2.42	0.00108444	3
Head	1	2.43	-0.00463664	3
Head	1	2.44	-0.00566067	3
Head	1	2.45	-0.00260384	3
Head	1	2.46	-0.0229633	3
Head	1	2.47	-0.0156361	3
Head	1	2.48	0.000900033	3
Head	1	2.49	-0.00940234	3
Head	1	2.5	-0.00526136	3
Head	1	2.51	-0.0140177	3
Head	1	2.52	-0.00877056	3
Head	1	2.53	-0.0235542	3
Head	1	2.54	0.00102976	3
Head	1	2.55	-0.00918396	3
Head	1	2.56	-0.0453625	3
Head	1	2.57	-0.0100732	3
Head	1	2.58	-0.020172	3
Head	1	2.59	-0.0474442	3
Head	1	2.6	-0.0100743	3
Head	1	2.61	-0.0367517	3
Head	1	2.62	-0.0465884	3
Head	1	2.63	-0.0308831	3
Head	1	2.64	-0.0351044	3
Head	1	2.65	-0.00789572	3
Head	1	2.66	-0.042488	3
Head	1	2.67	-0.0352187	3
Head	1	2.68	-0.0248726	3
Head	1	2.69	-0.0129059	3
Head	1	2.7	-0.0176481	3
Head	1	2.71	-0.0445765	3
Head	1	2.72	-0.0570363	3
Head	1	2.73	-0.00690476	3
Head	1	2.74	-0.00743998	3
Head	1	2.75	-0.0139232	3
Head	1	2.76	-0.0263801	3
Head	1	2.77	-0.0143709	3
Head	1	2.78	-0.0262375	3
Head	1	2.79	-0.0257723	3
Head	1	2.8	-0.0333755	3
Head	1	2.81	-0.00596504	3
Head	1	2.82	-0.0619941	3
Head	1	2.83	-0.00750499	3
Head	1	2.84	-0.00171854	3
Head	1	2.85	-0.00793469	3
Head	1	2.86	-0.0287784	3
Head	1	2.87	-0.0297323	3
Head	1	2.88	-0.0170217	3
Head	1	2.89	-0.0140774	3
Head	1	2.9	-0.0113767	3
Head	1	2.91	-0.044082	3
Head	1	2.92	-0.0378033	3
Head	1	2.93	-0.0305525	3
Head	1	2.94	-0.0142082	3
Head	1	2.95	-0.024217	3
Head	1	2.96	-0.0114817	3
Head	1	2.97	-0.000417326	3
Head	1	2.98	-0.0201659	3
Head	1	2.99	-0.0381376	3
Head	1	3	-0.0758493	3
Head	1	3.01	-0.0285999	3
Head	1	3.02	-0.00773799	3
Head	1	3.03	-0.00059734	3
Head	1	3.04	-0.0382736	3
Head	1	3.05	-0.0238476	3
Head	1	3.06	-0.0415559	3
Head	1	3.07	-0.0238103	3
Head	1	3.08	-0.0521768	3
Head	1	3.09	-0.00744977	3
Head	1	3.1	-0.00127409	3
Head	1	3.11	-0.0305765	3
Head	1	3.12	-0.0131354	3
Head	1	3.13	-0.025152	3
Head	1	3.14	-0.0366178	3
Head	1	3.15	-0.000345833	3
Head	1	3.16	-0.0157948	3
Head	1	3.17	-0.00361827	3
Head	1	3.18	-0.0161228	3
Head	1	3.19	-0.0128944	3
Head	1	3.2	-0.00118467	3
Head	1	3.21	-0.0105639	3
Head	1	3.22	-0.0096892	3
Head	1	3.23	-0.0266339	3
Head	1	3.24	-0.0119044	3
Head	1	3.25	-0.00772853	3
Head	1	3.26	-0.0368727	3
Head	1	3.27	-0.00821922	3
Head	1	3.28	-0.012927	3
Head	1	3.29	-0.0507209	3
Head	1	3.3	-0.0561529	3
Head	1	3.31	-0.00622545	3
Head	1	3.32	-0.0109534	3
Head	1	3.33	-0.00576048	3
Head	1	3.34	-0.0455987	3
Head	1	3.35	-0.0125073	3
Head	1	3.36	-0.0448251	3
Head	1	3.37	-0.0770205	3
Head	1	3.38	-0.0419705	3
Head	1	3.39	-0.0681687	3
Head	1	3.4	-0.0193068	3
Head	1	3.41	-0.00160236	3
Head	1	3.42	-0.0178472	3
Head	1	3.43	-0.000918082	3
Head	1	3.44	-0.00282537	3
Head	1	3.45	-0.0219626	3
Head	1	3.46	-0.00119701	3
Head	1	3.47	-0.0706466	3
Head	1	3.48	-0.0129167	3
Head	1	3.49	-0.0405936	3
Head	1	3.5	-0.0106905	3
Head	1	3.51	-0.0125175	3
Head	1	3.52	-0.0253253	3
Head	1	3.53	-0.02716	3
Head	1	3.54	-0.00662854	3
Head	1	3.55	-0.0189324	3
Head	1	3.56	-0.00677971	3
Head	1	3.57	-0.00435902	3
Head	1	3.58	-0.0505543	3
Head	1	3.59	-0.097429	3
Head	1	3.6	-0.0282817	3
Head	1	3.61	-0.029388	3
Head	1	3.62	-0.0769939	3
Head	1	3.63	-0.00369536	3
Head	1	3.64	-0.019093	3
Head	1	3.65	-0.00474582	3
Head	1	3.66	-0.0160119	3
Head	1	3.67	-0.0170442	3
Head	1	3.68	-0.00668447	3
Head	1	3.69	-0.0181048	3
Head	1	3.7	-0.000972986	3
Head	1	3.71	-0.0100353	3
Head	1	3.72	-0.00252998	3
Head	1	3.73	-0.0743719	3
Head	1	3.74	-0.0334003	3
Head	1	3.75	-0.00359385	3
Head	1	3.76	-0.0282396	3
Head	1	3.77	-0.0181389	3
Head	1	3.78	-0.0188663	3
Head	1	3.79	-0.021082	3
Head	1	3.8	-0.0173543	3
Head	1	3.81	-0.00838571	3
Head	1	3.82	-0.0327327	3
Head	1	3.83	-0.0478126	3
Head	1	3.84	-0.0330465	3
Head	1	3.85	-0.0730396	3
Head	1	3.86	-0.0414259	3
Head	1	3.87	-0.0181647	3
Head	1	3.88	-0.0381551	3
Head	1	3.89	-0.00820683	3
Head	1	3.9	-0.0391148	3
Head	1	3.91	-0.0214846	3
Head	1	3.92	-0.00163027	3
Head	1	3.93	-0.0348883	3
Head	1	3.94	-0.0406972	3
Head	1	3.95	-0.0186123	3
Head	1	3.96	-0.00444317	3
Head	1	3.97	-0.0112207	3
Head	1	3.98	-0.00449401	3
Head	1	3.99	-0.0207893	3
Head	1	4	-0.039088	3
Head	1	0	0.881092	4
Head	1	0.01	0.849292	4
Head	1	0.02	0.811231	4
Head	1	0.03	0.815754	4
Head	1	0.04	0.781898	4
Head	1	0.05	0.767846	4
Head	1	0.06	0.74348	4
Head	1	0.07	0.644253	4
Head	1	0.08	0.703563	4
Head	1	0.09	0.62838	4
Head	1	0.1	0.633681	4
Head	1	0.11	0.599658	4
Head	1	0.12	0.599637	4
Head	1	0.13	0.62598	4
Head	1	0.14	0.584412	4
Head	1	0.15	0.581269	4
Head	1	0.16	0.572281	4
Head	1	0.17	0.540018	4
Head	1	0.18	0.519016	4
Head	1	0.19	0.533655	4
Head	1	0.2	0.468947	4
Head	1	0.21	0.466846	4
Head	1	0.22	0.465903	4
Head	1	0.23	0.468988	4
Head	1	0.24	0.458877	4
Head	1	0.25	0.449775	4
Head	1	0.26	0.428455	4
Head	1	0.27	0.421821	4
Head	1	0.28	0.413383	4
Head	1	0.29	0.383278	4
Head	1	0.3	0.375857	4
Head	1	0.31	0.382317	4
Head	1	0.32	0.3663	4
Head	1	0.33	0.341119	4
Head	1	0.34	0.349784	4
Head	1	0.35	0.287735	4
Head	1	0.36	0.308877	4
Head	1	0.37	0.265411	4
Head	1	0.38	0.317995	4
Head	1	0.39	0.260031	4
Head	1	0.4	0.288559	4
Head	1	0.41	0.244851	4
Head	1	0.42	0.265113	4
Head	1	0.43	0.268441	4
Head	1	0.44	0.253796	4
Head	1	0.45	0.269184	4
Head	1	0.46	0.225956	4
Head	1	0.47	0.249166	4
Head	1	0.48	0.208965	4
Head	1	0.49	0.207308	4
Head	1	0.5	0.236046	4
Head	1	0.51	0.181247	4
Head	1	0.52	0.188077	4
Head	1	0.53	0.193427	4
Head	1	0.54	0.20616	4
Head	1	0.55	0.197945	4
Head	1	0.56	0.179644	4
Head	1	0.57	0.168913	4
Head	1	0.58	0.17276	4
Head	1	0.59	0.154667	4
Head	1	0.6	0.169589	4
Head	1	0.61	0.162038	4
Head	1	0.62	0.138851	4
Head	1	0.63	0.130959	4
Head	1	0.64	0.151103	4
Head	1	0.65	0.147628	4
Head	1	0.66	0.149803	4
Head	1	0.67	0.0950197	4
Head	1	0.68	0.101018	4
Head	1	0.69	0.142352	4
Head	1	0.7	0.117183	4
Head	1	0.71	0.129096	4
Head	1	0.72	0.123236	4
Head	1	0.73	0.119445	4
Head	1	0.74	0.0777921	4
Head	1	0.75	0.118322	4
Head	1	0.76	0.0933701	4
Head	1	0.77	0.10638	4
Head	1	0.78	0.100549	4
Head	1	0.79	0.101321	4
Head	1	0.8	0.0576775	4
Head	1	0.81	0.0837832	4
Head	1	0.82	0.0579588	4
Head	1	0.83	0.090711	4
Head	1	0.84	0.0353052	4
Head	1	0.85	0.0865424	4
Head	1	0.86	0.0874064	4
Head	1	0.87	0.0877637	4
Head	1	0.88	0.0459302	4
Head	1	0.89	0.0721735	4
Head	1	0.9	0.0179797	4
Head	1	0.91	0.0568257	4
Head	1	0.92	0.0628255	4
Head	1	0.93	0.0675551	4
Head	1	0.94	0.0663356	4
Head	1	0.95	0.0598782	4
Head	1	0.96	0.0251128	4
Head	1	0.97	0.0608461	4
Head	1	0.98	0.00657136	4
Head	1	0.99	0.0330528	4
Head	1	1	0.0533244	4
Head	1	1.01	0.0187337	4
Head	1	1.02	0.0325439	4
Head	1	1.03	0.0497288	4
Head	1	1.04	0.0087366	4
Head	1	1.05	0.0550943	4
Head	1	1.06	0.0140409	4
Head	1	1.07	0.0516459	4
Head	1	1.08	0.0221149	4
Head	1	1.09	0.0489601	4
Head	1	1.1	0.00874153	4
Head	1	1.11	0.0367341	4
Head	1	1.12	0.0273913	4
Head	1	1.13	0.037116	4
Head	1	1.14	0.0348439	4
Head	1	1.15	0.0119815	4
Head	1	1.16	0.0124135	4
Head	1	1.17	0.0273702	4
Head	1	1.18	0.00885184	4
Head	1	1.19	-0.000552588	4
Head	1	1.2	0.0302251	4
Head	1	1.21	-0.0344339	4
Head	1	1.22	0.01526	4
Head	1	1.23	0.00956047	4
Head	1	1.24	0.0230252	4
Head	1	1.25	0.00173449	4
Head	1	1.26	0.00686505	4
Head	1	1.27	7.30593e-05	4
Head	1	1.28	0.0142568	4
Head	1	1.29	0.00706296	4
Head	1	1.3	0.0176595	4
Head	1	1.31	0.0226572	4
Head	1	1.32	0.0191328	4
Head	1	1.33	0.0192157	4
Head	1	1.34	0.0179342	4
Head	1	1.35	0.00895755	4
Head	1	1.36	0.00493866	4
Head	1	1.37	0.0133099	4
Head	1	1.38	-0.0109506	4
Head	1	1.39	0.0177178	4
Head	1	1.4	0.0102966	4
Head	1	1.41	0.0089025	4
Head	1	1.42	0.00473756	4
Head	1	1.43	-0.00333369	4
Head	1	1.44	0.0192234	4
Head	1	1.45	0.0152573	4
Head	1	1.46	-0.0470882	4
Head	1	1.47	-0.0311585	4
Head	1	1.48	0.00074026	4
Head	1	1.49	0.0113312	4
Head	1	1.5	0.00377193	4
Head	1	1.51	0.0149057	4
Head	1	1.52	0.0143653	4
Head	1	1.53	-0.0570081	4
Head	1	1.54	-0.00852514	4
Head	1	1.55	0.0142838	4
Head	1	1.56	0.000869139	4
Head	1	1.57	-0.0258822	4
Head	1	1.58	-0.00931476	4
Head	1	1.59	0.0121454	4
Head	1	1.6	-0.000440738	4
Head	1	1.61	-0.0407627	4
Head	1	1.62	-0.0104086	4
Head	1	1.63	-0.0265642	4
Head	1	1.64	-0.0433609	4
Head	1	1.65	-0.0467539	4
Head	1	1.66	-0.0175449	4
Head	1	1.67	-0.00763784	4
Head	1	1.68	-0.011314	4
Head	1	1.69	0.00775807	4
Head	1	1.7	0.00942198	4
Head	1	1.71	-0.0271475	4
Head	1	1.72	-0.00833723	4
Head	1	1.73	-0.015615	4
Head	1	1.74	-0.00880196	4
Head	1	1.75	-0.0530847	4
Head	1	1.76	0.00531611	4
Head	1	1.77	0.00248059	4
Head	1	1.78	-0.0119327	4
Head	1	1.79	-0.0546659	4
Head	1	1.8	-0.0377876	4
Head	1	1.81	-0.0174998	4
Head	1	1.82	-0.00803024	4
Head	1	1.83	0.00288852	4
Head	1	1.84	-0.000523304	4
Head	1	1.85	-0.00885009	4
Head	1	1.86	-0.0210709	4
Head	1	1.87	-0.00988563	4
Head	1	1.88	-0.0392823	4
Head	1	1.89	-0.0168766	4
Head	1	1.9	-0.0180905	4
Head	1	1.91	-0.00574421	4
Head	1	1.92	-0.0289092	4
Head	1	1.93	-0.0403249	4
Head	1	1.94	0.00426358	4
Head	1	1.95	-0.0101248	4
Head	1	1.96	-0.031218	4
Head	1	1.97	-0.0178943	4
Head	1	1.98	-0.00513042	4
Head	1	1.99	0.00395694	4
Head	1	2	-0.0317764	4
Head	1	2.01	-0.0110109	4
Head	1	2.02	-0.00494247	4
Head	1	2.03	-0.0130038	4
Head	1	2.04	-0.00864742	4
Head	1	2.05	-0.00974181	4
Head	1	2.06	-0.00437859	4
Head	1	2.07	0.00205112	4
Head	1	2.08	-0.0293559	4
Head	1	2.09	-0.0475889	4
Head	1	2.1	-0.00640536	4
Head	1	2.11	-0.0473311	4
Head	1	2.12	-0.0422915	4
Head	1	2.13	-0.00202322	4
Head	1	2.14	-0.0243172	4
Head	1	2.15	-0.001595	4
Head	1	2.16	-0.00784354	4
Head	1	2.17	-0.026847	4
Head	1	2.18	-0.00269225	4
Head	1	2.19	-0.00131813	4
Head	1	2.2	0.0020377	4
Head	1	2.21	-0.0222982	4
Head	1	2.22	-0.0251327	4
Head	1	2.23	-0.0350109	4
Head	1	2.24	-0.0158104	4
Head	1	2.25	-0.0203481	4
Head	1	2.26	-0.0438366	4
Head	1	2.27	-0.0649788	4
Head	1	2.28	-0.0156834	4
Head	1	2.29	-0.00286676	4
Head	1	2.3	-0.00760118	4
Head	1	2.31	-0.0102153	4
Head	1	2.32	-0.0103716	4
Head	1	2.33	-0.0215884	4
Head	1	2.34	0.00169567	4
Head	1	2.35	-0.0223679	4
Head	1	2.36	-0.00809327	4
Head	1	2.37	-0.00793117	4
Head	1	2.38	-0.00357806	4
Head	1	2.39	-0.00431503	4
Head	1	2.4	-0.0357188	4
Head	1	2.41	-0.0144094	4
Head	1	2.42	-0.00750091	4
Head	1	2.43	-0.0011906	4
Head	1	2.44	-0.0345058	4
Head	1	2.45	-0.00700626	4
Head	1	2.46	-0.0188439	4
Head	1	2.47	-0.0507728	4
Head	1	2.48	-0.0417522	4
Head	1	2.49	-0.0092721	4
Head	1	2.5	0.000466167	4
Head	1	2.51	-0.0798354	4
Head	1	2.52	-0.00985768	4
Head	1	2.53	-0.0445669	4
Head	1	2.54	-0.033136	4
Head	1	2.55	-0.0127117	4
Head	1	2.56	-0.0265466	4
Head	1	2.57	-0.00468872	4
Head	1	2.58	-0.0144673	4
Head	1	2.59	-0.0273021	4
Head	1	2.6	-0.0900429	4
Head	1	2.61	-0.051954	4
Head	1	2.62	-0.0233753	4
Head	1	2.63	-0.069064	4
Head	1	2.64	-0.0488348	4
Head	1	2.65	-0.0912173	4
Head	1	2.66	-0.0224043	4
Head	1	2.67	-0.0118754	4
Head	1	2.68	-0.0278266	4
Head	1	2.69	-0.0511773	4
Head	1	2.7	-0.0186113	4
Head	1	2.71	-0.00551449	4
Head	1	2.72	-0.0431458	4
Head	1	2.73	-0.0224738	4
Head	1	2.74	-0.0515992	4
Head	1	2.75	-0.0113724	4
Head	1	2.76	-0.0236808	4
Head	1	2.77	-0.0201745	4
Head	1	2.78	-0.0139997	4
Head	1	2.79	-0.0401456	4
Head	1	2.8	-0.0365559	4
Head	1	2.81	-0.0489681	4
Head	1	2.82	-0.0286792	4
Head	1	2.83	-0.00216432	4
Head	1	2.84	-0.00271101	4
Head	1	2.85	-0.0153158	4
Head	1	2.86	-0.024417	4
Head	1	2.87	-0.0405458	4
Head	1	2.88	-0.0253257	4
Head	1	2.89	-0.0153711	4
Head	1	2.9	-0.0127506	4
Head	1	2.91	-0.017284	4
Head	1	2.92	-0.0501967	4
Head	1	2.93	-0.0209022	4
Head	1	2.94	-0.000244029	4
Head	1	2.95	-0.0195158	4
Head	1	2.96	-0.0199262	4
Head	1	2.97	-0.0215725	4
Head	1	2.98	-0.0235187	4
Head	1	2.99	-0.015377	4
Head	1	3	0.00020248	4
Head	1	3.01	-0.0336574	4
Head	1	3.02	-0.0410205	4
Head	1	3.03	-0.0261707	4
Head	1	3.04	-0.0320711	4
Head	1	3.05	-0.0181982	4
Head	1	3.06	-0.0184867	4
Head	1	3.07	-0.033752	4
Head	1	3.08	-0.00868114	4
Head	1	3.09	-0.0169036	4
Head	1	3.1	-0.00773191	4
Head	1	3.11	-0.0287994	4
Head	1	3.12	-0.0329136	4
Head	1	3.13	-0.00834306	4
Head	1	3.14	-0.0038151	4
Head	1	3.15	-0.0349095	4
Head	1	3.16	-0.00794117	4
Head	1	3.17	-0.0127164	4
Head	1	3.18	-0.0220796	4
Head	1	3.19	-0.0440612	4
Head	1	3.2	-0.0281256	4
Head	1	3.21	-0.00689163	4
Head	1	3.22	-0.00726508	4
Head	1	3.23	-0.0178156	4
Head	1	3.24	-0.0342235	4
Head	1	3.25	-0.0527696	4
Head	1	3.26	-0.0087345	4
Head	1	3.27	-0.0630856	4
Head	1	3.28	-0.0225586	4
Head	1	3.29	-0.0113044	4
Head	1	3.3	-0.0448342	4
Head	1	3.31	-0.00092489	4
Head	1	3.32	-0.0424239	4
Head	1	3.33	-0.0124492	4
Head	1	3.34	-0.0170042	4
Head	1	3.35	-0.0190131	4
Head	1	3.36	-0.0144383	4
Head	1	3.37	-0.0358652	4
Head	1	3.38	-0.0470752	4
Head	1	3.39	-0.0686563	4
Head	1	3.4	-0.0144293	4
Head	1	3.41	-0.0299594	4
Head	1	3.42	-0.0070761	4
Head	1	3.43	-0.00916054	4
Head	1	3.44	-0.0223155	4
Head	1	3.45	-0.00815971	4
Head	1	3.46	-0.001139	4
Head	1	3.47	-0.00982414	4
Head	1	3.48	-0.0128831	4
Head	1	3.49	-0.0365389	4
Head	1	3.5	-0.0224539	4
Head	1	3.51	-0.0167775	4
Head	1	3.52	-0.0131415	4
Head	1	3.53	-0.000439977	4
Head	1	3.54	-0.00232664	4
Head	1	3.55	-0.044129	4
Head	1	3.56	-0.0777688	4
Head	1	3.57	-0.0145566	4
Head	1	3.58	-0.0629358	4
Head	1	3.59	-0.0663584	4
Head	1	3.6	-0.00802781	4
Head	1	3.61	-0.0363645	4
Head	1	3.62	-0.0365959	4
Head	1	3.63	-0.0364048	4
Head	1	3.64	-0.0263162	4
Head	1	3.65	-0.0501727	4
Head	1	3.66	-0.0263381	4
Head	1	3.67	-0.0314018	4
Head	1	3.68	-0.0230036	4
Head	1	3.69	-0.0327923	4
Head	1	3.7	-0.0314225	4
Head	1	3.71	-0.011059	4
Head	1	3.72	-0.013749	4
Head	1	3.73	-0.0197333	4
Head	1	3.74	-0.000694142	4
Head	1	3.75	-0.00699576	4
Head	1	3.76	-0.00244971	4
Head	1	3.77	-0.00712126	4
Head	1	3.78	-0.000525377	4
Head	1	3.79	-0.0295371	4
Head	1	3.8	-0.0194112	4
Head	1	3.81	-0.00638049	4
Head	1	3.82	-0.0423782	4
Head	1	3.83	-0.0455096	4
Head	1	3.84	-0.00735945	4
Head	1	3.85	-0.0164623	4
Head	1	3.86	-0.0586941	4
Head	1	3.87	-0.047579	4
Head	1	3.88	-0.0135739	4
Head	1	3.89	-0.0397009	4
Head	1	3.9	-0.00419477	4
Head	1	3.91	-0.0140115	4
Head	1	3.92	-0.039856	4
Head	1	3.93	-0.00354064	4
Head	1	3.94	-0.0140153	4
Head	1	3.95	-0.0221927	4
Head	1	3.96	-0.0416231	4
Head	1	3.97	-0.0432806	4
Head	1	3.98	-0.0126991	4
Head	1	3.99	-0.0222938	4
Head	1	4	-0.00255952	4
Head	1	0	0.862895	5
Head	1	0.01	0.847299	5
Head	1	0.02	0.810351	5
Head	1	0.03	0.791585	5
Head	1	0.04	0.791552	5
Head	1	0.05	0.75096	5
Head	1	0.06	0.737208	5
Head	1	0.07	0.717776	5
Head	1	0.08	0.701779	5
Head	1	0.09	0.701004	5
Head	1	0.1	0.671141	5
Head	1	0.11	0.644243	5
Head	1	0.12	0.590028	5
Head	1	0.13	0.602828	5
Head	1	0.14	0.579963	5
Head	1	0.15	0.572615	5
Head	1	0.16	0.544498	5
Head	1	0.17	0.579462	5
Head	1	0.18	0.561539	5
Head	1	0.19	0.53153	5
Head	1	0.2	0.52379	5
Head	1	0.21	0.522344	5
Head	1	0.22	0.498616	5
Head	1	0.23	0.499147	5
Head	1	0.24	0.488819	5
Head	1	0.25	0.474026	5
Head	1	0.26	0.443665	5
Head	1	0.27	0.450955	5
Head	1	0.28	0.411389	5
Head	1	0.29	0.413502	5
Head	1	0.3	0.404793	5
Head	1	0.31	0.399188	5
Head	1	0.32	0.364864	5
Head	1	0.33	0.365253	5
Head	1	0.34	0.367465	5
Head	1	0.35	0.297844	5
Head	1	0.36	0.35327	5
Head	1	0.37	0.311669	5
Head	1	0.38	0.299778	5
Head	1	0.39	0.33665	5
Head	1	0.4	0.28833	5
Head	1	0.41	0.290255	5
Head	1	0.42	0.267776	5
Head	1	0.43	0.259189	5
Head	1	0.44	0.272008	5
Head	1	0.45	0.289092	5
Head	1	0.46	0.269671	5
Head	1	0.47	0.262767	5
Head	1	0.48	0.242242	5
Head	1	0.49	0.243773	5
Head	1	0.5	0.233463	5
Head	1	0.51	0.213596	5
Head	1	0.52	0.243173	5
Head	1	0.53	0.228282	5
Head	1	0.54	0.227367	5
Head	1	0.55	0.185917	5
Head	1	0.56	0.211866	5
Head	1	0.57	0.189605	5
Head	1	0.58	0.182254	5
Head	1	0.59	0.174526	5
Head	1	0.6	0.1823	5
Head	1	0.61	0.161361	5
Head	1	0.62	0.18644	5
Head	1	0.63	0.140324	5
Head	1	0.64	0.160419	5
Head	1	0.65	0.153095	5
Head	1	0.66	0.158569	5
Head	1	0.67	0.116999	5
Head	1	0.68	0.153033	5
Head	1	0.69	0.096605	5
Head	1	0.7	0.156942	5
Head	1	0.71	0.154452	5
Head	1	0.72	0.0952951	5
Head	1	0.73	0.14312	5
Head	1	0.74	0.128127	5
Head	1	0.75	0.116658	5
Head	1	0.76	0.0865546	5
Head	1	0.77	0.130028	5
Head	1	0.78	0.110678	5
Head	1	0.79	0.109257	5
Head	1	0.8	0.067386	5
Head	1	0.81	0.100229	5
Head	1	0.82	0.102964	5
Head	1	0.83	0.0924379	5
Head	1	0.84	0.11048	5
Head	1	0.85	0.106574	5
Head	1	0.86	0.105192	5
Head	1	0.87	0.087359	5
Head	1	0.88	0.08412	5
Head	1	0.89	0.0833535	5
Head	1	0.9	0.0643259	5
Head	1	0.91	0.0677873	5
Head	1	0.92	0.0790726	5
Head	1	0.93	0.0536432	5
Head	1	0.94	0.0823034	5
Head	1	0.95	0.0825347	5
Head	1	0.96	0.0837415	5
Head	1	0.97	0.0740712	5
Head	1	0.98	0.05212	5
Head	1	0.99	0.0746791	5
Head	1	1	0.0635851	5
Head	1	1.01	0.0109198	5
Head	1	1.02	0.0438151	5
Head	1	1.03	0.0564705	5
Head	1	1.04	0.00478501	5
Head	1	1.05	0.0315435	5
Head	1	1.06	0.0439509	5
Head	1	1.07	0.0190769	5
Head	1	1.08	0.0599897	5
Head	1	1.09	0.0583238	5
Head	1	1.1	0.0250853	5
Head	1	1.11	0.0539161	5
Head	1	1.12	0.00113254	5
Head	1	1.13	0.0262808	5
Head	1	1.14	-0.00376268	5
Head	1	1.15	0.0427216	5
Head	1	1.16	0.0504642	5
Head	1	1.17	0.0491514	5
Head	1	1.18	0.0430708	5
Head	1	1.19	0.0406181	5
Head	1	1.2	0.0246534	5
Head	1	1.21	0.00214107	5
Head	1	1.22	0.0251564	5
Head	1	1.23	0.0298287	5
Head	1	1.24	0.0375947	5
Head	1	1.25	0.000291732	5
Head	1	1.26	0.0345844	5
Head	1	1.27	-0.0368818	5
Head	1	1.28	0.0145033	5
Head	1	1.29	0.0187327	5
Head	1	1.3	0.0214149	5
Head	1	1.31	-0.00810414	5
Head	1	1.32	0.00543181	5
Head	1	1.33	0.0230375	5
Head	1	1.34	0.0137491	5
Head	1	1.35	-0.0145227	5
Head	1	1.36	-0.012817	5
Head	1	1.37	0.0237392	5
Head	1	1.38	0.0194829	5
Head	1	1.39	0.0155598	5
Head	1	1.4	-0.0243455	5
Head	1	1.41	0.0187317	5
Head	1	1.42	0.0232897	5
Head	1	1.43	0.0121	5
Head	1	1.44	-0.0302852	5
Head	1	1.45	0.0133055	5
Head	1	1.46	0.0136222	5
Head	1	1.47	0.0147002	5
Head	1	1.48	0.02042	5
Head	1	1.49	-0.0240446	5
Head	1	1.5	0.010576	5
Head	1	1.51	-0.028811	5
Head	1	1.52	-0.00759841	5
Head	1	1.53	-0.0100934	5
Head	1	1.54	0.00771449	5
Head	1	1.55	-0.0363083	5
Head	1	1.56	-0.0654547	5
Head	1	1.57	-0.0245107	5
Head	1	1.58	-0.00601243	5
Head	1	1.59	-0.0179983	5
Head	1	1.6	0.00693786	5
Head	1	1.61	-0.0170067	5
Head	1	1.62	-0.00315379	5
Head	1	1.63	0.00543794	5
Head	1	1.64	-0.00375073	5
Head	1	1.65	-0.0221294	5
Head	1	1.66	0.00705828	5
Head	1	1.67	-0.0220928	5
Head	1	1.68	-0.0301622	5
Head	1	1.69	0.0006153	5
Head	1	1.7	-0.00871208	5
Head	1	1.71	0.0110064	5
Head	1	1.72	0.007299	5
Head	1	1.73	-0.00972339	5
Head	1	1.74	0.00511363	5
Head	1	1.75	0.00557693	5
Head	1	1.76	-0.0566294	5
Head	1	1.77	0.00500279	5
Head	1	1.78	-0.0321213	5
Head	1	1.79	-0.0258214	5
Head	1	1.8	0.00239633	5
Head	1	1.81	-0.0110423	5
Head	1	1.82	-0.0319084	5
Head	1	1.83	-0.0219558	5
Head	1	1.84	0.00479438	5
Head	1	1.85	-0.0131002	5
Head	1	1.86	0.00341799	5
Head	1	1.87	-0.0311053	5
Head	1	1.88	-0.00220872	5
Head	1	1.89	-0.0345273	5
Head	1	1.9	-0.007681	5
Head	1	1.91	0.00428386	5
Head	1	1.92	-0.00569063	5
Head	1	1.93	-0.00426456	5
Head	1	1.94	-0.0106077	5
Head	1	1.95	0.00241885	5
Head	1	1.96	-0.0195768	5
Head	1	1.97	-0.0279499	5
Head	1	1.98	-0.0286771	5
Head	1	1.99	-0.0229501	5
Head	1	2	-0.0270012	5
Head	1	2.01	-0.00946844	5
Head	1	2.02	-0.00485567	5
Head	1	2.03	-0.0479518	5
Head	1	2.04	-0.00737645	5
Head	1	2.05	-0.0465608	5
Head	1	2.06	-0.0490505	5
Head	1	2.07	-0.00715896	5
Head	1	2.08	-0.0149955	5
Head	1	2.09	0.0024855	5
Head	1	2.1	-0.013502	5
Head	1	2.11	-0.036909	5
Head	1	2.12	-0.0101944	5
Head	1	2.13	-0.00711199	5
Head	1	2.14	-0.0345242	5
Head	1	2.15	-0.0848342	5
Head	1	2.16	-0.0101585	5
Head	1	2.17	-0.00615749	5
Head	1	2.18	-0.00809491	5
Head	1	2.19	-0.0135123	5
Head	1	2.2	-0.024787	5
Head	1	2.21	-0.0329371	5
Head	1	2.22	-0.00268742	5
Head	1	2.23	-0.0450524	5
Head	1	2.24	0.000870299	5
Head	1	2.25	0.00118068	5
Head	1	2.26	-0.0195968	5
Head	1	2.27	-0.0532507	5
Head	1	2.28	-0.0523655	5
Head	1	2.29	-0.00591275	5
Head	1	2.3	-0.0225587	5
Head	1	2.31	-0.00775366	5
Head	1	2.32	-0.040258	5
Head	1	2.33	-0.0590873	5
Head	1	2.34	-0.0306309	5
Head	1	2.35	-0.0259001	5
Head	1	2.36	-0.0492996	5
Head	1	2.37	0.0017561	5
Head	1	2.38	-0.0452667	5
Head	1	2.39	-0.0536633	5
Head	1	2.4	-0.0442621	5
Head	1	2.41	-0.0376206	5
Head	1	2.42	-0.0277483	5
Head	1	2.43	-0.0582936	5
Head	1	2.44	-0.00330833	5
Head	1	2.45	-0.00330246	5
Head	1	2.46	-0.0404796	5
Head	1	2.47	-0.0154174	5
Head	1	2.48	-0.0210379	5
Head	1	2.49	-0.0346895	5
Head	1	2.5	-0.0804119	5
Head	1	2.51	-0.0438543	5
Head	1	2.52	-0.0296493	5
Head	1	2.53	-0.0159794	5
Head	1	2.54	-0.00069812	5
Head	1	2.55	-0.00982721	5
Head	1	2.56	-0.0289295	5
Head	1	2.57	-0.0409583	5
Head	1	2.58	-0.0376136	5
Head	1	2.59	-0.0181739	5
Head	1	2.6	-0.0052701	5
Head	1	2.61	-0.0136809	5
Head	1	2.62	-0.0109803	5
Head	1	2.63	-0.0238462	5
Head	1	2.64	-0.000264147	5
Head	1	2.65	-0.0353446	5
Head	1	2.66	-0.0444679	5
Head	1	2.67	-0.00322054	5
Head	1	2.68	-0.014939	5
Head	1	2.69	-0.0115895	5
Head	1	2.7	-0.0180854	5
Head	1	2.71	-0.01346	5
Head	1	2.72	-0.0579629	5
Head	1	2.73	-0.00151124	5
Head	1	2.74	-0.0046294	5
Head	1	2.75	-0.0108096	5
Head	1	2.76	-0.0541963	5
Head	1	2.77	-0.0264436	5
Head	1	2.78	-0.0126847	5
Head	1	2.79	-0.0023332	5
Head	1	2.8	-0.0141796	5
Head	1	2.81	-0.0276975	5
Head	1	2.82	-0.0219593	5
Head	1	2.83	-0.0224802	5
Head	1	2.84	-0.0360411	5
Head	1	2.85	-0.0372915	5
Head	1	2.86	-0.0284279	5
Head	1	2.87	-0.0148774	5
Head	1	2.88	-0.0305455	5
Head	1	2.89	-0.0174535	5
Head	1	2.9	-0.0107054	5
Head	1	2.91	-0.0263807	5
Head	1	2.92	-0.0397362	5
Head	1	2.93	-0.00319547	5
Head	1	2.94	-0.058645	5
Head	1	2.95	-0.0115241	5
Head	1	2.96	-0.022164	5
Head	1	2.97	-0.011019	5
Head	1	2.98	-0.00340475	5
Head	1	2.99	-0.0219179	5
Head	1	3	-0.0429315	5
Head	1	3.01	-0.00249152	5
Head	1	3.02	0.000148559	5
Head	1	3.03	-0.0327184	5
Head	1	3.04	-0.0192965	5
Head	1	3.05	-0.0167715	5
Head	1	3.06	-0.00302814	5
Head	1	3.07	-0.0660761	5
Head	1	3.08	-0.0155891	5
Head	1	3.09	-0.0225905	5
Head	1	3.1	-0.0226568	5
Head	1	3.11	-0.0615963	5
Head	1	3.12	-0.0235722	5
Head	1	3.13	-0.0105918	5
Head	1	3.14	-0.0159906	5
Head	1	3.15	-0.00825386	5
Head	1	3.16	-0.0294952	5
Head	1	3.17	-0.0239405	5
Head	1	3.18	-0.00173032	5
Head	1	3.19	-0.0614576	5
Head	1	3.2	-0.0264002	5
Head	1	3.21	-0.00485772	5
Head	1	3.22	-0.02246	5
Head	1	3.23	-0.0267588	5
Head	1	3.24	-0.0240523	5
Head	1	3.25	-0.00878978	5
Head	1	3.26	-0.0145895	5
Head	1	3.27	-0.0139757	5
Head	1	3.28	-0.0375838	5
Head	1	3.29	-0.0397263	5
Head	1	3.3	-0.0271213	5
Head	1	3.31	-0.032268	5
Head	1	3.32	-0.00628287	5
Head	1	3.33	-0.0461397	5
Head	1	3.34	-0.0498767	5
Head	1	3.35	-0.0628984	5
Head	1	3.36	-0.0123818	5
Head	1	3.37	-0.0203092	5
Head	1	3.38	-0.00477772	5
Head	1	3.39	-0.00705029	5
Head	1	3.4	-0.0118111	5
Head	1	3.41	-0.00290012	5
Head	1	3.42	-0.00655103	5
Head	1	3.43	-0.0154594	5
Head	1	3.44	-0.0354792	5
Head	1	3.45	-0.00787644	5
Head	1	3.46	-0.021269	5
Head	1	3.47	-0.0226501	5
Head	1	3.48	-0.00811594	5
Head	1	3.49	-0.00790453	5
Head	1	3.5	-0.010478	5
Head	1	3.51	-0.0151373	5
Head	1	3.52	-0.0134216	5
Head	1	3.53	-0.0164133	5
Head	1	3.54	-0.0239605	5
Head	1	3.55	-0.0188241	5
Head	1	3.56	-0.0540506	5
Head	1	3.57	-0.0387565	5
Head	1	3.58	-0.013187	5
Head	1	3.59	-0.00723283	5
Head	1	3.6	-0.0760736	5
Head	1	3.61	-0.0187595	5
Head	1	3.62	-0.0192625	5
Head	1	3.63	-0.0179816	5
Head	1	3.64	-0.0227566	5
Head	1	3.65	-0.0167693	5
Head	1	3.66	-0.0234192	5
Head	1	3.67	-0.0305778	5
Head	1	3.68	-0.0351613	5
Head	1	3.69	-0.0493247	5
Head	1	3.7	-0.0215575	5
Head	1	3.71	-0.0431507	5
Head	1	3.72	-0.000419185	5
Head	1	3.73	-0.0296704	5
Head	1	3.74	-0.0100011	5
Head	1	3.75	-0.030785	5
Head	1	3.76	-0.024539	5
Head	1	3.77	-0.0137912	5
Head	1	3.78	-0.0194969	5
Head	1	3.79	-0.0119522	5
Head	1	3.8	-0.0319091	5
Head	1	3.81	-0.043268	5
Head	1	3.82	-0.0146029	5
Head	1	3.83	-0.0255598	5
Head	1	3.84	-0.0215284	5
Head	1	3.85	-0.0220153	5
Head	1	3.86	-1.48504e-05	5
Head	1	3.87	-0.074865	5
Head	1	3.88	-0.0181365	5
Head	1	3.89	-0.0109961	5
Head	1	3.9	-0.0108793	5
Head	1	3.91	-0.0235695	5
Head	1	3.92	-0.0193214	5
Head	1	3.93	-0.0116331	5
Head	1	3.94	-1.71702e-05	5
[truncated: 16,046 more rows]

## Sheet: Exp_3_Impedance
rep	Body	Int	freq	R	X
1	Head	I1	20	36430.5	-928.61
1	Head	I1	20	36411.1	-929.43
1	Head	I1	20	36338.6	-925.92
1	Head	I1	20	36422.2	-928
1	Head	I1	20	36443.3	-925.46
1	Head	I1	22.56	36329.3	-1038.85
1	Head	I1	22.56	36319.2	-1038.07
1	Head	I1	22.56	36374.3	-1039.63
1	Head	I1	22.56	36332	-1040.47
1	Head	I1	22.56	36410.9	-1039.6
1	Head	I1	25.13	36258.4	-1144.18
1	Head	I1	25.13	36258.4	-1148.76
1	Head	I1	25.13	36299.5	-1145.69
1	Head	I1	25.13	36304.8	-1149.26
1	Head	I1	25.13	36307.3	-1145.39
1	Head	I1	27.69	36332.1	-1249.15
1	Head	I1	27.69	36246.7	-1252.5
1	Head	I1	27.69	36213.2	-1249.6
1	Head	I1	27.69	36263.7	-1251.9
1	Head	I1	27.69	36258.2	-1252.88
1	Head	I1	30.26	36200.9	-1351.72
1	Head	I1	30.26	36237.7	-1355.17
1	Head	I1	30.26	36264.4	-1352.42
1	Head	I1	30.26	36232.4	-1350.3
1	Head	I1	30.26	36202.2	-1349.7
1	Head	I1	32.82	36160.2	-1447.92
1	Head	I1	32.82	36210.8	-1450.97
1	Head	I1	32.82	36173.6	-1448.46
1	Head	I1	32.82	36201.2	-1448.19
1	Head	I1	32.82	36188.3	-1448.35
1	Head	I1	35.38	36183.7	-1545.97
1	Head	I1	35.38	36162.3	-1543.52
1	Head	I1	35.38	36092.7	-1537.94
1	Head	I1	35.38	36142.5	-1541.7
1	Head	I1	35.38	36134	-1538.01
1	Head	I1	37.95	36138.9	-1633.41
1	Head	I1	37.95	36121	-1636.29
1	Head	I1	37.95	36100.3	-1635.53
1	Head	I1	37.95	36046.5	-1636.97
1	Head	I1	37.95	36138.1	-1630.04
1	Head	I1	40.51	36004	-1723.24
1	Head	I1	40.51	36005.1	-1716.34
1	Head	I1	40.51	36040	-1721.75
1	Head	I1	40.51	36007.8	-1721.32
1	Head	I1	40.51	36076.8	-1722.64
1	Head	I1	43.08	36027.9	-1801.57
1	Head	I1	43.08	36001.4	-1809.77
1	Head	I1	43.08	35994.2	-1807.14
1	Head	I1	43.08	35983.3	-1805.35
1	Head	I1	43.08	35937.4	-1805.96
1	Head	I1	45.64	35859.3	-1887.11
1	Head	I1	45.64	35991.8	-1888.33
1	Head	I1	45.64	35943.1	-1885.8
1	Head	I1	45.64	35820.2	-1886.23
1	Head	I1	45.64	35911.8	-1890.23
1	Head	I1	48.21	35876.2	-1965.25
1	Head	I1	48.21	35910.9	-1964.78
1	Head	I1	48.21	35799.6	-1965.42
1	Head	I1	48.21	35787.7	-1963.04
1	Head	I1	48.21	35883.5	-1963.36
1	Head	I1	50.77	35833	-2043.35
1	Head	I1	50.77	35770.1	-2038.19
1	Head	I1	50.77	35800.1	-2035.78
1	Head	I1	50.77	35770.8	-2039.12
1	Head	I1	50.77	35863.7	-2039.82
1	Head	I1	53.33	35742	-2107.15
1	Head	I1	53.33	35757.8	-2107.34
1	Head	I1	53.33	35839.8	-2107.99
1	Head	I1	53.33	35730.7	-2110.36
1	Head	I1	53.33	35743.8	-2110.44
1	Head	I1	55.9	35660.1	-2178.97
1	Head	I1	55.9	35720.7	-2183.76
1	Head	I1	55.9	35617	-2179.13
1	Head	I1	55.9	35654.4	-2178.02
1	Head	I1	55.9	35679.7	-2178.11
1	Head	I1	58.46	35675.5	-2245.64
1	Head	I1	58.46	35688.3	-2240.64
1	Head	I1	58.46	35716.1	-2249.55
1	Head	I1	58.46	35638.3	-2244.36
1	Head	I1	58.46	35626.9	-2247.8
1	Head	I1	61.03	35607.8	-2308.81
1	Head	I1	61.03	35626.3	-2312.07
1	Head	I1	61.03	35547.4	-2308.65
1	Head	I1	61.03	35533.5	-2309.86
1	Head	I1	61.03	35517.9	-2305.12
1	Head	I1	63.59	35513.2	-2367.96
1	Head	I1	63.59	35638.9	-2365.94
1	Head	I1	63.59	35481.7	-2364.56
1	Head	I1	63.59	35439.9	-2364.7
1	Head	I1	63.59	35530.8	-2371.89
1	Head	I1	66.15	35487.4	-2419.5
1	Head	I1	66.15	35517.9	-2417.82
1	Head	I1	66.15	35477.5	-2429.06
1	Head	I1	66.15	35441	-2419.25
1	Head	I1	66.15	35415.2	-2428
1	Head	I1	68.72	35428.1	-2481.41
1	Head	I1	68.72	35420.9	-2478.17
1	Head	I1	68.72	35418.5	-2476.66
1	Head	I1	68.72	35464.2	-2481
1	Head	I1	68.72	35416.6	-2483.42
1	Head	I1	71.28	35390.4	-2529.56
1	Head	I1	71.28	35327.7	-2534.81
1	Head	I1	71.28	35324.6	-2538.41
1	Head	I1	71.28	35385.6	-2534.19
1	Head	I1	71.28	35393.5	-2536.14
1	Head	I1	73.85	35292.3	-2586.97
1	Head	I1	73.85	35256	-2586.85
1	Head	I1	73.85	35290.7	-2586.84
1	Head	I1	73.85	35331.5	-2585.86
1	Head	I1	73.85	35335.9	-2583.84
1	Head	I1	76.41	35271.2	-2640.05
1	Head	I1	76.41	35280.3	-2632.96
1	Head	I1	76.41	35241	-2635.37
1	Head	I1	76.41	35257.9	-2630.35
1	Head	I1	76.41	35194.1	-2635.17
1	Head	I1	78.97	35127	-2681.36
1	Head	I1	78.97	35180.3	-2683.12
1	Head	I1	78.97	35269.1	-2678.47
1	Head	I1	78.97	35178.2	-2687.8
1	Head	I1	78.97	35156.5	-2688.9
1	Head	I1	81.54	35141.2	-2725.24
1	Head	I1	81.54	35161	-2724.38
1	Head	I1	81.54	35105.8	-2723.43
1	Head	I1	81.54	35168.5	-2728.52
1	Head	I1	81.54	35133.2	-2725.82
1	Head	I1	84.1	35206.6	-2772.61
1	Head	I1	84.1	35116.6	-2772.18
1	Head	I1	84.1	35061.1	-2773.4
1	Head	I1	84.1	35150.7	-2775.55
1	Head	I1	84.1	35158	-2777.73
1	Head	I1	86.67	35054.3	-2814.4
1	Head	I1	86.67	35083.2	-2814.44
1	Head	I1	86.67	35040.3	-2809
1	Head	I1	86.67	35021.1	-2816.16
1	Head	I1	86.67	35014.2	-2810.25
1	Head	I1	89.23	35095.7	-2847.88
1	Head	I1	89.23	34989.3	-2855.87
1	Head	I1	89.23	35018.9	-2863.14
1	Head	I1	89.23	35020	-2852.71
1	Head	I1	89.23	35079	-2858.36
1	Head	I1	91.79	34961	-2899.68
1	Head	I1	91.79	34967.6	-2895.24
1	Head	I1	91.79	34994	-2899.38
1	Head	I1	91.79	35010.9	-2893.03
1	Head	I1	91.79	34971.3	-2902.58
1	Head	I1	94.36	34999.3	-2930.07
1	Head	I1	94.36	34929.3	-2938.1
1	Head	I1	94.36	34890	-2934.14
1	Head	I1	94.36	34987.3	-2933.34
1	Head	I1	94.36	35006.8	-2932.37
1	Head	I1	96.92	34836.9	-2970.77
1	Head	I1	96.92	34959.2	-2980.36
1	Head	I1	96.92	34868.1	-2977.78
1	Head	I1	96.92	34917.4	-2975.82
1	Head	I1	96.92	34962.1	-2971.24
1	Head	I1	99.49	34789.8	-3000.92
1	Head	I1	99.49	34829.3	-3012.12
1	Head	I1	99.49	34798	-3008.55
1	Head	I1	99.49	34716.8	-3010.4
1	Head	I1	99.49	34820.2	-3003.33
1	Head	I1	102.05	34732.6	-3043.37
1	Head	I1	102.05	34806.3	-3043.75
1	Head	I1	102.05	34693.4	-3044.53
1	Head	I1	102.05	34733.2	-3040.87
1	Head	I1	102.05	34722.6	-3042.46
1	Head	I1	104.62	34697.9	-3079.31
1	Head	I1	104.62	34759.9	-3077.61
1	Head	I1	104.62	34685.9	-3078.76
1	Head	I1	104.62	34712.1	-3075.14
1	Head	I1	104.62	34776.4	-3086.31
1	Head	I1	107.18	34658.2	-3108.44
1	Head	I1	107.18	34662.9	-3116.93
1	Head	I1	107.18	34684.2	-3108.46
1	Head	I1	107.18	34693.9	-3115.96
1	Head	I1	107.18	34696.6	-3114.11
1	Head	I1	109.74	34592.7	-3146.93
1	Head	I1	109.74	34518.5	-3140.53
1	Head	I1	109.74	34665.6	-3146.26
1	Head	I1	109.74	34614.4	-3143.34
1	Head	I1	109.74	34577.6	-3148.42
1	Head	I1	112.31	34532.6	-3176.45
1	Head	I1	112.31	34564	-3176.32
1	Head	I1	112.31	34640	-3173.98
1	Head	I1	112.31	34532.2	-3176.77
1	Head	I1	112.31	34604.3	-3181.06
1	Head	I1	114.87	34654.3	-3205.91
1	Head	I1	114.87	34464.2	-3207.83
1	Head	I1	114.87	34539.3	-3208.42
1	Head	I1	114.87	34509.9	-3203.04
1	Head	I1	114.87	34671.5	-3211.85
1	Head	I1	117.44	34508.1	-3241.43
1	Head	I1	117.44	34486.1	-3237.18
1	Head	I1	117.44	34572.3	-3245.76
1	Head	I1	117.44	34574.8	-3234.91
1	Head	I1	117.44	34562.9	-3238.16
1	Head	I1	120	34437.1	-3266.39
1	Head	I1	120	34483.5	-3270.11
1	Head	I1	120	34430.4	-3278.67
1	Head	I1	120	34448.4	-3265.82
1	Head	I1	120	34520.6	-3274.07
2	Head	I1	20	35122.6	-955.25
2	Head	I1	20	35043	-952.48
2	Head	I1	20	35117.4	-955.24
2	Head	I1	20	35057.1	-957.15
2	Head	I1	20	35033.3	-956.8
2	Head	I1	22.56	34979.4	-1067.88
2	Head	I1	22.56	35038.9	-1067.61
2	Head	I1	22.56	34974.6	-1068.16
2	Head	I1	22.56	35066.7	-1068.53
2	Head	I1	22.56	35051.7	-1069.22
2	Head	I1	25.13	35026.3	-1176.82
2	Head	I1	25.13	35011.6	-1175.55
2	Head	I1	25.13	34974.9	-1177.53
2	Head	I1	25.13	34966.3	-1173.61
2	Head	I1	25.13	35030.2	-1176.02
2	Head	I1	27.69	34971.1	-1281.69
2	Head	I1	27.69	34894.3	-1279.91
2	Head	I1	27.69	35002.4	-1280.26
2	Head	I1	27.69	34953.5	-1281.59
2	Head	I1	27.69	34954.3	-1281.15
2	Head	I1	30.26	34833.6	-1382.37
2	Head	I1	30.26	34896.7	-1381.86
2	Head	I1	30.26	34917.4	-1385.47
2	Head	I1	30.26	34907.1	-1385.15
2	Head	I1	30.26	34898.2	-1382.11
2	Head	I1	32.82	34817.4	-1481.56
2	Head	I1	32.82	34842.6	-1478.05
2	Head	I1	32.82	34812.9	-1477.26
2	Head	I1	32.82	34825.9	-1477.1
2	Head	I1	32.82	34826.1	-1477.28
2	Head	I1	35.38	34798.2	-1572.41
2	Head	I1	35.38	34814.3	-1573.39
2	Head	I1	35.38	34868.2	-1572.29
2	Head	I1	35.38	34782	-1573.1
2	Head	I1	35.38	34782.9	-1575.37
2	Head	I1	37.95	34692.1	-1667.96
2	Head	I1	37.95	34778.5	-1661.11
2	Head	I1	37.95	34732.8	-1663.21
2	Head	I1	37.95	34709.6	-1662.26
2	Head	I1	37.95	34722.8	-1664.05
2	Head	I1	40.51	34712	-1748.81
2	Head	I1	40.51	34644.7	-1751.25
2	Head	I1	40.51	34636.5	-1752.05
2	Head	I1	40.51	34657.6	-1749.9
2	Head	I1	40.51	34687.2	-1748.29
2	Head	I1	43.08	34627.2	-1833.68
2	Head	I1	43.08	34603.6	-1832.56
2	Head	I1	43.08	34640	-1831.65
2	Head	I1	43.08	34571.7	-1832.89
2	Head	I1	43.08	34536.7	-1830.41
2	Head	I1	45.64	34571.8	-1906.05
2	Head	I1	45.64	34527.8	-1909.49
2	Head	I1	45.64	34528	-1909.94
2	Head	I1	45.64	34501.8	-1909.51
2	Head	I1	45.64	34536.8	-1910.52
2	Head	I1	48.21	34514.5	-1982.43
2	Head	I1	48.21	34492.6	-1984.83
2	Head	I1	48.21	34507	-1982.01
2	Head	I1	48.21	34439	-1983.6
2	Head	I1	48.21	34513.1	-1985.23
2	Head	I1	50.77	34389.8	-2055.83
2	Head	I1	50.77	34375.5	-2048.87
2	Head	I1	50.77	34388.2	-2054.88
2	Head	I1	50.77	34408.6	-2054.71
2	Head	I1	50.77	34435.8	-2055.76
2	Head	I1	53.33	34399.3	-2120.66
2	Head	I1	53.33	34334	-2119.25
2	Head	I1	53.33	34393.4	-2123
2	Head	I1	53.33	34376.6	-2119.64
2	Head	I1	53.33	34363.8	-2119.15
2	Head	I1	55.9	34302.7	-2185.98
2	Head	I1	55.9	34310.1	-2186.35
2	Head	I1	55.9	34306	-2187.66
2	Head	I1	55.9	34244.5	-2182.6
2	Head	I1	55.9	34279.1	-2188.86
2	Head	I1	58.46	34246.3	-2247.84
2	Head	I1	58.46	34291	-2246.11
2	Head	I1	58.46	34262.7	-2247.11
2	Head	I1	58.46	34199.8	-2250.21
2	Head	I1	58.46	34264.1	-2245.06
2	Head	I1	61.03	34226.4	-2300.34
2	Head	I1	61.03	34183.7	-2307.57
2	Head	I1	61.03	34195.3	-2304.54
2	Head	I1	61.03	34198.9	-2305.05
2	Head	I1	61.03	34164.1	-2306.85
2	Head	I1	63.59	34113.4	-2363.98
2	Head	I1	63.59	34151.7	-2357.53
2	Head	I1	63.59	34115.8	-2362.08
2	Head	I1	63.59	34086.3	-2359.91
2	Head	I1	63.59	34169.4	-2365.31
2	Head	I1	66.15	34027.6	-2410.08
2	Head	I1	66.15	34135.1	-2409.63
2	Head	I1	66.15	34086.6	-2409.21
2	Head	I1	66.15	34045.2	-2411.69
2	Head	I1	66.15	34049.1	-2415.94
2	Head	I1	68.72	34029.2	-2465.12
2	Head	I1	68.72	34050.4	-2468.75
2	Head	I1	68.72	34005.4	-2467.65
2	Head	I1	68.72	33983.3	-2465.55
2	Head	I1	68.72	34007.7	-2462.86
2	Head	I1	71.28	33981.1	-2510.94
2	Head	I1	71.28	33940	-2512.33
2	Head	I1	71.28	33987.4	-2513.42
2	Head	I1	71.28	34012.6	-2514.1
2	Head	I1	71.28	33974.1	-2515.83
2	Head	I1	73.85	33911.4	-2567.58
2	Head	I1	73.85	33893.5	-2561
2	Head	I1	73.85	33869.1	-2554.47
2	Head	I1	73.85	33844.1	-2561.52
2	Head	I1	73.85	33846.7	-2557.86
2	Head	I1	76.41	33875.4	-2610.12
2	Head	I1	76.41	33894.7	-2604.08
2	Head	I1	76.41	33767.8	-2610.36
2	Head	I1	76.41	33874.9	-2606.48
2	Head	I1	76.41	33806.4	-2607.33
2	Head	I1	78.97	33814.7	-2649.01
2	Head	I1	78.97	33778.8	-2647.53
2	Head	I1	78.97	33805.3	-2652.7
2	Head	I1	78.97	33804.5	-2650.61
2	Head	I1	78.97	33769.3	-2647.7
2	Head	I1	81.54	33733.4	-2692.33
2	Head	I1	81.54	33721.1	-2692.85
2	Head	I1	81.54	33713.3	-2696.62
2	Head	I1	81.54	33701.1	-2692.31
2	Head	I1	81.54	33751.6	-2687.78
2	Head	I1	84.1	33657.2	-2731.51
2	Head	I1	84.1	33687.8	-2726.68
2	Head	I1	84.1	33708.7	-2730.63
2	Head	I1	84.1	33628.9	-2728.77
2	Head	I1	84.1	33643.2	-2725.55
2	Head	I1	86.67	33670.6	-2768.93
2	Head	I1	86.67	33671.9	-2766.51
2	Head	I1	86.67	33727.1	-2764.51
2	Head	I1	86.67	33674.2	-2763.67
2	Head	I1	86.67	33582.5	-2759.59
2	Head	I1	89.23	33609.2	-2812.55
2	Head	I1	89.23	33591.6	-2806.93
2	Head	I1	89.23	33608.9	-2801.52
2	Head	I1	89.23	33571.4	-2800.49
2	Head	I1	89.23	33614.5	-2802.63
2	Head	I1	91.79	33553.6	-2841.4
2	Head	I1	91.79	33545.3	-2844.71
2	Head	I1	91.79	33541.1	-2837.26
2	Head	I1	91.79	33565.9	-2841.73
2	Head	I1	91.79	33509.9	-2846.95
2	Head	I1	94.36	33482.8	-2876.63
2	Head	I1	94.36	33467	-2866.93
2	Head	I1	94.36	33457.8	-2877.95
2	Head	I1	94.36	33486	-2875.63
2	Head	I1	94.36	33513.8	-2866.79
2	Head	I1	96.92	33499.9	-2910.84
2	Head	I1	96.92	33419	-2908.33
2	Head	I1	96.92	33492.6	-2903.49
2	Head	I1	96.92	33452.9	-2912.79
2	Head	I1	96.92	33422.3	-2903.6
2	Head	I1	99.49	33425.7	-2937.43
2	Head	I1	99.49	33444.9	-2941.69
2	Head	I1	99.49	33409.9	-2937.31
2	Head	I1	99.49	33375.3	-2942.49
2	Head	I1	99.49	33401.3	-2936.48
2	Head	I1	102.05	33351	-2972.7
2	Head	I1	102.05	33380.5	-2975.22
2	Head	I1	102.05	33394.5	-2970.28
2	Head	I1	102.05	33422	-2974.08
2	Head	I1	102.05	33334.1	-2970.73
2	Head	I1	104.62	33319.3	-3009.31
2	Head	I1	104.62	33343.8	-3002.42
2	Head	I1	104.62	33356.2	-3002.1
2	Head	I1	104.62	33312.4	-3007.95
2	Head	I1	104.62	33354	-3002.97
2	Head	I1	107.18	33301.4	-3035.11
2	Head	I1	107.18	33252.6	-3033.85
2	Head	I1	107.18	33294.6	-3033.71
2	Head	I1	107.18	33245.4	-3038.71
2	Head	I1	107.18	33276.4	-3030.41
2	Head	I1	109.74	33231.6	-3066.96
2	Head	I1	109.74	33234.1	-3063.47
2	Head	I1	109.74	33222.2	-3063.29
2	Head	I1	109.74	33228.9	-3068.53
2	Head	I1	109.74	33237.2	-3061.73
2	Head	I1	112.31	33213.4	-3090.57
2	Head	I1	112.31	33143.6	-3092.86
2	Head	I1	112.31	33134.4	-3091.3
2	Head	I1	112.31	33223.7	-3091.92
2	Head	I1	112.31	33180.6	-3097.14
2	Head	I1	114.87	33163.7	-3124.26
2	Head	I1	114.87	33114.7	-3118.93
2	Head	I1	114.87	33194.2	-3119.74
2	Head	I1	114.87	33208.2	-3120.76
2	Head	I1	114.87	33133.5	-3119.15
2	Head	I1	117.44	33077.2	-3150.71
2	Head	I1	117.44	33127.5	-3152.51
2	Head	I1	117.44	33102.3	-3148.42
2	Head	I1	117.44	33083.7	-3153.05
2	Head	I1	117.44	33146.5	-3144.01
2	Head	I1	120	33079.4	-3170.26
2	Head	I1	120	33062.8	-3177.5
2	Head	I1	120	33102.3	-3178.68
2	Head	I1	120	33057.6	-3176
2	Head	I1	120	33130.9	-3174.1
3	Head	I1	20	35888	-965.6
3	Head	I1	20	35860.4	-969.81
3	Head	I1	20	35837.5	-965.99
3	Head	I1	20	35851.1	-967.23
3	Head	I1	20	35842.2	-967.84
3	Head	I1	22.56	35824.4	-1082.83
3	Head	I1	22.56	35826	-1077.79
3	Head	I1	22.56	35847.1	-1078.92
3	Head	I1	22.56	35830.1	-1082.05
3	Head	I1	22.56	35827.4	-1075.91
3	Head	I1	25.13	35775.3	-1189.62
3	Head	I1	25.13	35791.3	-1189.6
3	Head	I1	25.13	35791.8	-1190.92
3	Head	I1	25.13	35780.9	-1191.47
3	Head	I1	25.13	35793.2	-1185.81
3	Head	I1	27.69	35759.4	-1290.35
3	Head	I1	27.69	35712.1	-1296.8
3	Head	I1	27.69	35697.4	-1292.51
3	Head	I1	27.69	35703.3	-1291.71
3	Head	I1	27.69	35714	-1293.21
3	Head	I1	30.26	35681	-1393.98
3	Head	I1	30.26	35659.7	-1398.02
3	Head	I1	30.26	35675.8	-1395.4
3	Head	I1	30.26	35692.7	-1395.14
3	Head	I1	30.26	35683.6	-1396.04
3	Head	I1	32.82	35636.7	-1490.31
3	Head	I1	32.82	35603.2	-1491.12
3	Head	I1	32.82	35606.4	-1493.1
3	Head	I1	32.82	35616.3	-1493.29
3	Head	I1	32.82	35625.7	-1491.26
3	Head	I1	35.38	35559.7	-1586.53
3	Head	I1	35.38	35535.6	-1586.83
3	Head	I1	35.38	35572	-1586.18
3	Head	I1	35.38	35579.8	-1581.08
3	Head	I1	35.38	35587.2	-1584
3	Head	I1	37.95	35513.9	-1669.83
3	Head	I1	37.95	35509.7	-1675.85
3	Head	I1	37.95	35496.5	-1667.84
3	Head	I1	37.95	35489.2	-1672.67
3	Head	I1	37.95	35482.1	-1669.47
3	Head	I1	40.51	35434.5	-1757.4
3	Head	I1	40.51	35479.8	-1749.86
3	Head	I1	40.51	35427.5	-1756.41
3	Head	I1	40.51	35428.5	-1757.29
3	Head	I1	40.51	35428.4	-1751.28
3	Head	I1	43.08	35405.9	-1833.84
3	Head	I1	43.08	35395.3	-1836.7
3	Head	I1	43.08	35379.8	-1830.9
3	Head	I1	43.08	35378.7	-1838.69
3	Head	I1	43.08	35394.1	-1835.81
3	Head	I1	45.64	35360.8	-1914.12
3	Head	I1	45.64	35339.2	-1913.91
3	Head	I1	45.64	35325.6	-1915.68
3	Head	I1	45.64	35338.5	-1911.47
3	Head	I1	45.64	35311.9	-1911.28
3	Head	I1	48.21	35241.4	-1981.98
3	Head	I1	48.21	35271.3	-1978.58
3	Head	I1	48.21	35298.6	-1987.82
3	Head	I1	48.21	35242.8	-1991.2
3	Head	I1	48.21	35219.4	-1986.87
3	Head	I1	50.77	35192	-2054.46
3	Head	I1	50.77	35178.4	-2053.12
3	Head	I1	50.77	35196.7	-2054.35
3	Head	I1	50.77	35238.8	-2050.4
3	Head	I1	50.77	35214.8	-2045.77
3	Head	I1	53.33	35150	-2119.25
3	Head	I1	53.33	35170.8	-2116.97
3	Head	I1	53.33	35140.9	-2126.61
3	Head	I1	53.33	35164.3	-2123.68
3	Head	I1	53.33	35136.8	-2116.27
3	Head	I1	55.9	35084.6	-2182.4
3	Head	I1	55.9	35096.7	-2175.93
3	Head	I1	55.9	35099.6	-2178.68
3	Head	I1	55.9	35091.1	-2182.64
3	Head	I1	55.9	35087.9	-2184.55
3	Head	I1	58.46	34998.3	-2236.7
3	Head	I1	58.46	34991.9	-2246.05
3	Head	I1	58.46	34997.1	-2243.08
3	Head	I1	58.46	35008.8	-2241.63
3	Head	I1	58.46	35028.8	-2240.8
3	Head	I1	61.03	34985.3	-2293.27
3	Head	I1	61.03	34931.6	-2294.81
3	Head	I1	61.03	34933.5	-2304.72
3	Head	I1	61.03	34961.8	-2294.14
3	Head	I1	61.03	34941.8	-2296.48
3	Head	I1	63.59	34960.9	-2346.07
3	Head	I1	63.59	34943.3	-2351.04
3	Head	I1	63.59	34925.7	-2349.44
3	Head	I1	63.59	34882.7	-2355.05
3	Head	I1	63.59	34865.9	-2352.82
3	Head	I1	66.15	34873.2	-2402.72
3	Head	I1	66.15	34822.3	-2398.46
3	Head	I1	66.15	34839.7	-2396.89
3	Head	I1	66.15	34831.8	-2402.87
3	Head	I1	66.15	34846.9	-2398.8
3	Head	I1	68.72	34828.3	-2458.95
3	Head	I1	68.72	34809.6	-2443.03
3	Head	I1	68.72	34792.6	-2455.58
3	Head	I1	68.72	34802.8	-2452.94
3	Head	I1	68.72	34813.8	-2445.52
3	Head	I1	71.28	34760.7	-2500.27
3	Head	I1	71.28	34729.2	-2492.62
3	Head	I1	71.28	34741	-2497.37
3	Head	I1	71.28	34705.6	-2494.31
3	Head	I1	71.28	34721.3	-2492.47
3	Head	I1	73.85	34670.9	-2539
3	Head	I1	73.85	34666.9	-2548.88
3	Head	I1	73.85	34667.1	-2547.56
3	Head	I1	73.85	34695.1	-2547.12
3	Head	I1	73.85	34654	-2539.75
3	Head	I1	76.41	34603.2	-2584.68
3	Head	I1	76.41	34611.4	-2584.44
3	Head	I1	76.41	34659.2	-2594
3	Head	I1	76.41	34623.1	-2578.17
3	Head	I1	76.41	34621.5	-2586.26
3	Head	I1	78.97	34564.1	-2621.28
3	Head	I1	78.97	34583.8	-2636.7
3	Head	I1	78.97	34568	-2622.81
3	Head	I1	78.97	34602.7	-2626.4
3	Head	I1	78.97	34611.7	-2630.69
3	Head	I1	81.54	34544.7	-2669.12
3	Head	I1	81.54	34549.8	-2665.5
3	Head	I1	81.54	34526.2	-2665.57
3	Head	I1	81.54	34542.1	-2664.7
3	Head	I1	81.54	34527.9	-2662.61
3	Head	I1	84.1	34472	-2709.84
3	Head	I1	84.1	34462.5	-2703.21
3	Head	I1	84.1	34473.1	-2710.07
3	Head	I1	84.1	34445.1	-2703.55
3	Head	I1	84.1	34482.4	-2707.57
3	Head	I1	86.67	34431.4	-2742.52
3	Head	I1	86.67	34430	-2740.58
3	Head	I1	86.67	34422.5	-2741
3	Head	I1	86.67	34442.4	-2742.41
3	Head	I1	86.67	34434.3	-2743.8
3	Head	I1	89.23	34418.9	-2780.22
3	Head	I1	89.23	34366.7	-2780.81
3	Head	I1	89.23	34334.2	-2777.33
3	Head	I1	89.23	34371.9	-2779.65
3	Head	I1	89.23	34395.6	-2780.34
3	Head	I1	91.79	34319.9	-2812.16
3	Head	I1	91.79	34317	-2812.35
3	Head	I1	91.79	34341.2	-2803.61
3	Head	I1	91.79	34345.2	-2812.85
3	Head	I1	91.79	34319.9	-2816.64
3	Head	I1	94.36	34265	-2846.99
3	Head	I1	94.36	34301.7	-2840.54
3	Head	I1	94.36	34280.2	-2850.53
3	Head	I1	94.36	34304.9	-2839.32
3	Head	I1	94.36	34320.9	-2848.68
3	Head	I1	96.92	34267.3	-2881.38
3	Head	I1	96.92	34236.9	-2880.62
3	Head	I1	96.92	34222	-2881.69
3	Head	I1	96.92	34232.6	-2878.79
3	Head	I1	96.92	34249.6	-2884.63
3	Head	I1	99.49	34199.9	-2916.13
3	Head	I1	99.49	34195.2	-2913.8
3	Head	I1	99.49	34150.1	-2904.58
3	Head	I1	99.49	34194.6	-2903.95
3	Head	I1	99.49	34191.3	-2914.3
3	Head	I1	102.05	34156.7	-2940.66
3	Head	I1	102.05	34155.9	-2943.17
3	Head	I1	102.05	34180.5	-2941.34
3	Head	I1	102.05	34163.7	-2936.65
3	Head	I1	102.05	34151.7	-2939.47
3	Head	I1	104.62	34123.3	-2976.94
3	Head	I1	104.62	34112	-2976.26
3	Head	I1	104.62	34109.3	-2970.45
3	Head	I1	104.62	34119.6	-2973.22
3	Head	I1	104.62	34125.6	-2974.96
3	Head	I1	107.18	34085.3	-3002.93
3	Head	I1	107.18	34106.6	-3004.24
3	Head	I1	107.18	34063.9	-3002.29
3	Head	I1	107.18	34083.3	-3000.55
3	Head	I1	107.18	34085.3	-3006.44
3	Head	I1	109.74	34045.7	-3035.26
3	Head	I1	109.74	34016.7	-3036.86
3	Head	I1	109.74	34024.7	-3037.58
3	Head	I1	109.74	33999.2	-3028.56
3	Head	I1	109.74	34028.1	-3037.38
3	Head	I1	112.31	34032.6	-3064.33
3	Head	I1	112.31	34005.2	-3061.23
3	Head	I1	112.31	33968.2	-3065.33
3	Head	I1	112.31	34008.2	-3052.94
3	Head	I1	112.31	33987.2	-3058.6
3	Head	I1	114.87	33902.6	-3088.35
3	Head	I1	114.87	33975.7	-3079.72
3	Head	I1	114.87	33964.3	-3092.98
3	Head	I1	114.87	33943.3	-3084.58
3	Head	I1	114.87	33935.3	-3083.75
3	Head	I1	117.44	33895.4	-3119
3	Head	I1	117.44	33908.1	-3115.04
3	Head	I1	117.44	33952.5	-3120.93
3	Head	I1	117.44	33907	-3115.11
3	Head	I1	117.44	33927.4	-3115.8
3	Head	I1	120	33890.2	-3143.07
3	Head	I1	120	33906.5	-3144.17
3	Head	I1	120	33867.6	-3139.55
3	Head	I1	120	33872.4	-3141.53
3	Head	I1	120	33856.8	-3143.81
4	Head	I1	20	35337.7	-924.03
4	Head	I1	20	35286.3	-924.2
4	Head	I1	20	35354.9	-925.87
4	Head	I1	20	35387	-925.53
4	Head	I1	20	35288.1	-925.43
4	Head	I1	22.56	35228.8	-1032.31
4	Head	I1	22.56	35260.4	-1033.47
4	Head	I1	22.56	35303.1	-1031.56
4	Head	I1	22.56	35323.1	-1034.55
4	Head	I1	22.56	35301.1	-1035.31
4	Head	I1	25.13	35249.1	-1139.36
4	Head	I1	25.13	35243.2	-1139.29
4	Head	I1	25.13	35271.7	-1138.74
4	Head	I1	25.13	35288.9	-1138.69
4	Head	I1	25.13	35296.3	-1138.6
4	Head	I1	27.69	35220.1	-1240.47
4	Head	I1	27.69	35128.4	-1243.33
4	Head	I1	27.69	35154.6	-1240.06
4	Head	I1	27.69	35206.3	-1240.03
4	Head	I1	27.69	35172.4	-1238.45
4	Head	I1	30.26	35202.5	-1336.21
4	Head	I1	30.26	35149.4	-1338.49
4	Head	I1	30.26	35203.1	-1336.94
4	Head	I1	30.26	35168.4	-1335.18
4	Head	I1	30.26	35167.8	-1341.06
4	Head	I1	32.82	35125.2	-1433.09
4	Head	I1	32.82	35188.1	-1430.68
4	Head	I1	32.82	35162.1	-1431.91
4	Head	I1	32.82	35133.8	-1431.53
4	Head	I1	32.82	35129.4	-1431.96
4	Head	I1	35.38	35045.9	-1523.4
4	Head	I1	35.38	35035.8	-1520.48
4	Head	I1	35.38	35094.8	-1521.34
4	Head	I1	35.38	35031.8	-1523.84
4	Head	I1	35.38	35069.1	-1521.78
4	Head	I1	37.95	35018.4	-1610.09
4	Head	I1	37.95	34998.4	-1609.76
4	Head	I1	37.95	34960	-1604.22
4	Head	I1	37.95	34997.7	-1605.98
4	Head	I1	37.95	34955.4	-1611.44
4	Head	I1	40.51	34963.9	-1690.5
4	Head	I1	40.51	35030.3	-1693.5
4	Head	I1	40.51	34977.9	-1693.71
4	Head	I1	40.51	34945	-1691.63
4	Head	I1	40.51	34934	-1687.67
4	Head	I1	43.08	34876.3	-1770.72
4	Head	I1	43.08	34845.7	-1767.31
4	Head	I1	43.08	34827.6	-1770.22
4	Head	I1	43.08	34872.8	-1767.14
4	Head	I1	43.08	34871.8	-1768.11
4	Head	I1	45.64	34830	-1849.56
4	Head	I1	45.64	34786.2	-1847.2
4	Head	I1	45.64	34812.7	-1846.2
4	Head	I1	45.64	34829.7	-1843.98
4	Head	I1	45.64	34845.8	-1846.69
4	Head	I1	48.21	34759.6	-1919.81
4	Head	I1	48.21	34778.9	-1917.78
4	Head	I1	48.21	34740.3	-1919.17
4	Head	I1	48.21	34770.6	-1918.56
4	Head	I1	48.21	34745.8	-1917.06
4	Head	I1	50.77	34683.5	-1984.41
4	Head	I1	50.77	34732.3	-1986.18
4	Head	I1	50.77	34729.2	-1986.79
4	Head	I1	50.77	34681.6	-1986.93
4	Head	I1	50.77	34682.7	-1986.75
4	Head	I1	53.33	34634.1	-2050.78
4	Head	I1	53.33	34642.1	-2050.37
4	Head	I1	53.33	34706.6	-2055.49
4	Head	I1	53.33	34644.4	-2049.39
4	Head	I1	53.33	34651.4	-2052.55
4	Head	I1	55.9	34589.9	-2120.29
4	Head	I1	55.9	34568.9	-2113.21
4	Head	I1	55.9	34646.4	-2112.7
4	Head	I1	55.9	34678.8	-2110.14
4	Head	I1	55.9	34557.3	-2110.62
4	Head	I1	58.46	34553.1	-2173.57
4	Head	I1	58.46	34532	-2175.09
4	Head	I1	58.46	34522.8	-2171.44
4	Head	I1	58.46	34568.7	-2174.88
4	Head	I1	58.46	34550.5	-2172.29
4	Head	I1	61.03	34465.7	-2230.09
4	Head	I1	61.03	34481.7	-2235.16
4	Head	I1	61.03	34469.6	-2231.38
4	Head	I1	61.03	34527.4	-2230.52
4	Head	I1	61.03	34511.8	-2230.24
4	Head	I1	63.59	34460.2	-2286.29
4	Head	I1	63.59	34560	-2285.54
4	Head	I1	63.59	34441	-2282.26
4	Head	I1	63.59	34362.1	-2288.16
4	Head	I1	63.59	34486.4	-2281.73
4	Head	I1	66.15	34368	-2339.53
4	Head	I1	66.15	34337.5	-2338.13
4	Head	I1	66.15	34358.1	-2332.26
4	Head	I1	66.15	34350.9	-2338.84
4	Head	I1	66.15	34378.1	-2334.47
4	Head	I1	68.72	34245.7	-2393.3
4	Head	I1	68.72	34324.2	-2386.03
4	Head	I1	68.72	34226.7	-2386.25
4	Head	I1	68.72	34352.7	-2387.85
4	Head	I1	68.72	34279.8	-2382.04
4	Head	I1	71.28	34236.4	-2433.83
4	Head	I1	71.28	34266.2	-2434.11
4	Head	I1	71.28	34249.4	-2430.94
4	Head	I1	71.28	34211.5	-2428.44
4	Head	I1	71.28	34253.9	-2434.18
4	Head	I1	73.85	34280.3	-2479.66
4	Head	I1	73.85	34126	-2480.87
4	Head	I1	73.85	34247.8	-2476.94
4	Head	I1	73.85	34257.2	-2480.74
4	Head	I1	73.85	34213.3	-2476.46
4	Head	I1	76.41	34131.4	-2524.19
4	Head	I1	76.41	34153	-2523.51
4	Head	I1	76.41	34185.2	-2521.93
4	Head	I1	76.41	34136.5	-2522.38
4	Head	I1	76.41	34145.1	-2522.34
4	Head	I1	78.97	34151.4	-2561.29
4	Head	I1	78.97	34060.9	-2570.01
4	Head	I1	78.97	34144.5	-2566.48
4	Head	I1	78.97	34155.2	-2567.11
4	Head	I1	78.97	34153.9	-2567.32
4	Head	I1	81.54	34044.8	-2604.42
4	Head	I1	81.54	34079.4	-2604.99
4	Head	I1	81.54	34065.6	-2607.44
4	Head	I1	81.54	34030.1	-2607.93
4	Head	I1	81.54	34006.5	-2606.46
4	Head	I1	84.1	33947.9	-2644.09
4	Head	I1	84.1	33980.7	-2646.93
4	Head	I1	84.1	33972.2	-2639.16
4	Head	I1	84.1	33998.6	-2641.71
4	Head	I1	84.1	34015	-2645.66
4	Head	I1	86.67	33959	-2685.09
4	Head	I1	86.67	33941	-2680.47
4	Head	I1	86.67	33999.7	-2677.29
4	Head	I1	86.67	33928.1	-2682.32
4	Head	I1	86.67	33971	-2683
4	Head	I1	89.23	33980.7	-2708.35
4	Head	I1	89.23	33884.2	-2716.14
4	Head	I1	89.23	33857.4	-2714.99
4	Head	I1	89.23	33910.9	-2717.3
4	Head	I1	89.23	33899.9	-2714.19
4	Head	I1	91.79	33861.3	-2749.66
4	Head	I1	91.79	33899.5	-2750.13
4	Head	I1	91.79	33852.7	-2748.18
4	Head	I1	91.79	33845	-2746.21
4	Head	I1	91.79	33867.7	-2751.6
4	Head	I1	94.36	33811.7	-2784.13
4	Head	I1	94.36	33780.6	-2784.79
4	Head	I1	94.36	33883.9	-2790.7
4	Head	I1	94.36	33809.8	-2787
4	Head	I1	94.36	33854.9	-2786.69
4	Head	I1	96.92	33735.6	-2815.42
4	Head	I1	96.92	33779.2	-2817.85
4	Head	I1	96.92	33773.4	-2818.6
4	Head	I1	96.92	33817.2	-2815.56
4	Head	I1	96.92	33735.2	-2822.61
4	Head	I1	99.49	33735.3	-2850.42
4	Head	I1	99.49	33747.6	-2847.75
4	Head	I1	99.49	33732.8	-2846.79
4	Head	I1	99.49	33759.8	-2849.98
4	Head	I1	99.49	33775	-2854.73
4	Head	I1	102.05	33720.2	-2882.22
4	Head	I1	102.05	33671.8	-2882.53
4	Head	I1	102.05	33689.9	-2878.17
4	Head	I1	102.05	33656.5	-2882.27
4	Head	I1	102.05	33635.1	-2881.52
4	Head	I1	104.62	33637	-2911.69
4	Head	I1	104.62	33602.8	-2908.51
4	Head	I1	104.62	33633.9	-2900.68
4	Head	I1	104.62	33574.5	-2909.27
4	Head	I1	104.62	33666.3	-2907.35
4	Head	I1	107.18	33589.5	-2939.78
4	Head	I1	107.18	33595	-2937.42
4	Head	I1	107.18	33564.9	-2937.62
4	Head	I1	107.18	33555.5	-2937.44
4	Head	I1	107.18	33592.9	-2940.33
4	Head	I1	109.74	33566.5	-2970.41
4	Head	I1	109.74	33527	-2968.99
4	Head	I1	109.74	33604.6	-2967.41
4	Head	I1	109.74	33652.6	-2970.75
4	Head	I1	109.74	33559.8	-2967.34
4	Head	I1	112.31	33502.3	-2996.41
4	Head	I1	112.31	33542.4	-2995.72
4	Head	I1	112.31	33504.8	-2995.84
4	Head	I1	112.31	33463.4	-2993.08
4	Head	I1	112.31	33487.7	-3000.94
4	Head	I1	114.87	33537.3	-3022.28
4	Head	I1	114.87	33471.4	-3022.98
4	Head	I1	114.87	33435.4	-3022.28
4	Head	I1	114.87	33515.4	-3026.34
4	Head	I1	114.87	33491.1	-3024.04
4	Head	I1	117.44	33370.8	-3048.8
4	Head	I1	117.44	33468.1	-3061.02
4	Head	I1	117.44	33397.3	-3050.21
4	Head	I1	117.44	33404.2	-3052.72
4	Head	I1	117.44	33470.3	-3046.24
4	Head	I1	120	33291.3	-3079.98
4	Head	I1	120	33437.4	-3077.36
4	Head	I1	120	33430.7	-3077.13
4	Head	I1	120	33415.6	-3079.25
4	Head	I1	120	33431.3	-3076.9
5	Head	I1	20	35458	-965.12
5	Head	I1	20	35449.5	-959.14
5	Head	I1	20	35470.4	-959.74
5	Head	I1	20	35472.4	-964.18
5	Head	I1	20	35436.6	-962.46
5	Head	I1	22.56	35436	-1073.18
5	Head	I1	22.56	35410	-1081.16
5	Head	I1	22.56	35417.3	-1075.6
5	Head	I1	22.56	35450.4	-1071.07
5	Head	I1	22.56	35443.8	-1079.66
5	Head	I1	25.13	35391.9	-1184.29
5	Head	I1	25.13	35386.8	-1191.67
5	Head	I1	25.13	35369.9	-1184.24
5	Head	I1	25.13	35370.7	-1188.49
5	Head	I1	25.13	35354.2	-1186.32
5	Head	I1	27.69	35347	-1297.55
5	Head	I1	27.69	35344.3	-1297.24
5	Head	I1	27.69	35350.6	-1293.6
5	Head	I1	27.69	35352.4	-1297.98
5	Head	I1	27.69	35286.9	-1292.6
5	Head	I1	30.26	35278.3	-1395.11
5	Head	I1	30.26	35333.4	-1392.9
5	Head	I1	30.26	35254	-1397.24
5	Head	I1	30.26	35266.2	-1388.64
5	Head	I1	30.26	35262.6	-1384.22
5	Head	I1	32.82	35260.3	-1499.07
5	Head	I1	32.82	35244.4	-1500.89
5	Head	I1	32.82	35231.6	-1484.87
5	Head	I1	32.82	35235.3	-1490.12
5	Head	I1	32.82	35251.5	-1485.08
5	Head	I1	35.38	35151.8	-1581.28
5	Head	I1	35.38	35182.7	-1589.3
5	Head	I1	35.38	35116.8	-1590.7
5	Head	I1	35.38	35182.5	-1578.51
5	Head	I1	35.38	35176.9	-1593.67
5	Head	I1	37.95	35109.7	-1677.76
5	Head	I1	37.95	35120.4	-1677.51
5	Head	I1	37.95	35102.8	-1680.43
5	Head	I1	37.95	35115.8	-1685.03
5	Head	I1	37.95	35080.3	-1683.17
5	Head	I1	40.51	35060.7	-1756.17
5	Head	I1	40.51	35055.2	-1753.51
5	Head	I1	40.51	35020.1	-1767.35
5	Head	I1	40.51	35060	-1765.24
5	Head	I1	40.51	35042.5	-1754.04
5	Head	I1	43.08	34976	-1852.02
5	Head	I1	43.08	34982.5	-1850.27
5	Head	I1	43.08	35003.6	-1832.26
5	Head	I1	43.08	34980.7	-1843.35
5	Head	I1	43.08	34980.2	-1848.22
5	Head	I1	45.64	34928.3	-1920.11
5	Head	I1	45.64	34962.9	-1926.42
5	Head	I1	45.64	34938.2	-1915.98
5	Head	I1	45.64	34939.8	-1918.1
5	Head	I1	45.64	34912.8	-1917.88
5	Head	I1	48.21	34897	-1995.53
5	Head	I1	48.21	34871.7	-1991.71
5	Head	I1	48.21	34852.4	-1994.21
5	Head	I1	48.21	34878.7	-2010.27
5	Head	I1	48.21	34885.6	-1995.1
5	Head	I1	50.77	34807.7	-2073.23
5	Head	I1	50.77	34815.1	-2069.89
5	Head	I1	50.77	34839.6	-2060.03
5	Head	I1	50.77	34813.6	-2073.81
5	Head	I1	50.77	34836.5	-2068.89
5	Head	I1	53.33	34779	-2134.99
5	Head	I1	53.33	34746.4	-2131.76
5	Head	I1	53.33	34734.7	-2122.27
5	Head	I1	53.33	34729.9	-2142.92
5	Head	I1	53.33	34773.7	-2131.86
5	Head	I1	55.9	34691.7	-2201.41
5	Head	I1	55.9	34701.7	-2185.58
5	Head	I1	55.9	34702.7	-2211.22
5	Head	I1	55.9	34695.8	-2200.02
5	Head	I1	55.9	34671.6	-2195.65
5	Head	I1	58.46	34607.9	-2265.56
5	Head	I1	58.46	34607.4	-2265.68
5	Head	I1	58.46	34645.8	-2254.03
5	Head	I1	58.46	34618	-2261.34
5	Head	I1	58.46	34645.8	-2264.6
5	Head	I1	61.03	34588.2	-2317.65
5	Head	I1	61.03	34585.5	-2324.37
5	Head	I1	61.03	34551.9	-2327.63
5	Head	I1	61.03	34564.9	-2314.54
5	Head	I1	61.03	34588.6	-2315.68
5	Head	I1	63.59	34515.5	-2382.82
5	Head	I1	63.59	34492.1	-2377.49
5	Head	I1	63.59	34520.1	-2374.53
5	Head	I1	63.59	34529.5	-2382
5	Head	I1	63.59	34526.6	-2371.95
5	Head	I1	66.15	34470.9	-2426.06
5	Head	I1	66.15	34470.8	-2439.79
5	Head	I1	66.15	34499.9	-2434.15
5	Head	I1	66.15	34431.9	-2429.72
5	Head	I1	66.15	34441.6	-2443.46
5	Head	I1	68.72	34391.3	-2475.86
5	Head	I1	68.72	34404.2	-2469.3
5	Head	I1	68.72	34410.7	-2481.09
5	Head	I1	68.72	34374	-2478.11
5	Head	I1	68.72	34401.8	-2482.26
5	Head	I1	71.28	34345	-2535.91
5	Head	I1	71.28	34345.8	-2537.89
5	Head	I1	71.28	34374.9	-2529.55
5	Head	I1	71.28	34322.1	-2548.54
5	Head	I1	71.28	34358.1	-2535.55
5	Head	I1	73.85	34304.4	-2584.28
5	Head	I1	73.85	34248.7	-2589.88
5	Head	I1	73.85	34250	-2567.31
5	Head	I1	73.85	34305.5	-2591.82
5	Head	I1	73.85	34279.4	-2577.24
5	Head	I1	76.41	34243.8	-2630.99
5	Head	I1	76.41	34235.6	-2622.52
5	Head	I1	76.41	34199.6	-2619.95
5	Head	I1	76.41	34250	-2617.7
5	Head	I1	76.41	34226.8	-2636.61
5	Head	I1	78.97	34187	-2681
5	Head	I1	78.97	34138.8	-2668.83
5	Head	I1	78.97	34181.8	-2666.31
5	Head	I1	78.97	34174.3	-2671.12
5	Head	I1	78.97	34122.9	-2663.1
5	Head	I1	81.54	34124.2	-2705.66
5	Head	I1	81.54	34139.3	-2714.93
5	Head	I1	81.54	34133.9	-2707.88
5	Head	I1	81.54	34104.6	-2715.21
5	Head	I1	81.54	34131.1	-2715.35
5	Head	I1	84.1	34075	-2748.95
5	Head	I1	84.1	34047.1	-2763.49
5	Head	I1	84.1	34098.9	-2743.29
5	Head	I1	84.1	34074.8	-2765.57
5	Head	I1	84.1	34074.5	-2757.36
5	Head	I1	86.67	34033.2	-2788.78
5	Head	I1	86.67	34046.4	-2796.45
5	Head	I1	86.67	34037.3	-2794.86
5	Head	I1	86.67	34014.8	-2788.2
5	Head	I1	86.67	34000.9	-2798.9
5	Head	I1	89.23	33975.4	-2831.26
5	Head	I1	89.23	33948.8	-2835.58
5	Head	I1	89.23	33944.4	-2833.4
5	Head	I1	89.23	33968.3	-2817.96
5	Head	I1	89.23	33954.5	-2807.49
5	Head	I1	91.79	33924.3	-2861.82
5	Head	I1	91.79	33941.3	-2856.64
5	Head	I1	91.79	33899.4	-2861.26
5	Head	I1	91.79	33914.7	-2870.2
5	Head	I1	91.79	33929.5	-2869.99
5	Head	I1	94.36	33864.2	-2909.4
5	Head	I1	94.36	33878.3	-2896.8
5	Head	I1	94.36	33908.6	-2893.3
5	Head	I1	94.36	33865	-2900.67
5	Head	I1	94.36	33901.7	-2902.93
5	Head	I1	96.92	33837.7	-2929.47
5	Head	I1	96.92	33830	-2939.08
5	Head	I1	96.92	33821.4	-2923.25
5	Head	I1	96.92	33835.8	-2930.99
5	Head	I1	96.92	33845.6	-2936.29
5	Head	I1	99.49	33784.4	-2962.27
5	Head	I1	99.49	33766.3	-2969.25
5	Head	I1	99.49	33756.1	-2952.25
5	Head	I1	99.49	33794.8	-2961.81
5	Head	I1	99.49	33781.2	-2952.41
5	Head	I1	102.05	33738.7	-2993.72
5	Head	I1	102.05	33742.8	-3006.95
5	Head	I1	102.05	33736.8	-2998.05
5	Head	I1	102.05	33745.1	-3009.55
5	Head	I1	102.05	33722	-3002.15
5	Head	I1	104.62	33695.3	-3047.69
5	Head	I1	104.62	33704.1	-3030.8
5	Head	I1	104.62	33699.6	-3028.72
5	Head	I1	104.62	33717.2	-3028.89
5	Head	I1	104.62	33691.1	-3035.19
5	Head	I1	107.18	33650.5	-3070.59
5	Head	I1	107.18	33658.9	-3055.92
5	Head	I1	107.18	33683.8	-3070.5
5	Head	I1	107.18	33637.7	-3055.87
5	Head	I1	107.18	33641.4	-3060.36
5	Head	I1	109.74	33577.4	-3099.48
5	Head	I1	109.74	33655.6	-3097.57
5	Head	I1	109.74	33638.7	-3080.92
5	Head	I1	109.74	33620	-3098.91
5	Head	I1	109.74	33640.5	-3085.27
5	Head	I1	112.31	33565.7	-3124.82
5	Head	I1	112.31	33561.4	-3125.49
5	Head	I1	112.31	33542.3	-3112.43
5	Head	I1	112.31	33547	-3116.4
5	Head	I1	112.31	33585.7	-3124.14
5	Head	I1	114.87	33522.4	-3150.14
5	Head	I1	114.87	33545.7	-3138.23
5	Head	I1	114.87	33550.4	-3159.2
5	Head	I1	114.87	33536	-3138.13
5	Head	I1	114.87	33546.2	-3139.97
5	Head	I1	117.44	33485.9	-3181.34
5	Head	I1	117.44	33525.6	-3185.53
5	Head	I1	117.44	33498.7	-3174.43
5	Head	I1	117.44	33500.1	-3189.86
5	Head	I1	117.44	33514.6	-3177.18
5	Head	I1	120	33492.6	-3211.44
5	Head	I1	120	33448.3	-3210.41
5	Head	I1	120	33459.4	-3197.45
5	Head	I1	120	33463.3	-3208.01
5	Head	I1	120	33462.6	-3216.25
1	Thorax	I1	20	26267	-1128.15
1	Thorax	I1	20	26339.8	-1133.87
1	Thorax	I1	20	26312.4	-1124.48
1	Thorax	I1	20	26343.6	-1122.88
1	Thorax	I1	20	26329.6	-1129.85
1	Thorax	I1	22.56	26195.8	-1210.27
1	Thorax	I1	22.56	26217	-1213.83
1	Thorax	I1	22.56	26176.4	-1216
1	Thorax	I1	22.56	26222.1	-1215.94
1	Thorax	I1	22.56	26182.9	-1215.24
1	Thorax	I1	25.13	26034.2	-1285.78
1	Thorax	I1	25.13	26073.5	-1285.83
1	Thorax	I1	25.13	26088	-1291.45
1	Thorax	I1	25.13	26095.4	-1288.81
1	Thorax	I1	25.13	26127.7	-1288.63
1	Thorax	I1	27.69	26012.9	-1353.87
1	Thorax	I1	27.69	25995	-1349.23
1	Thorax	I1	27.69	26064	-1345.52
1	Thorax	I1	27.69	26084.5	-1351.08
1	Thorax	I1	27.69	26046.6	-1350.27
1	Thorax	I1	30.26	25946.7	-1406.57
1	Thorax	I1	30.26	25910.5	-1400.46
1	Thorax	I1	30.26	25918.7	-1399.73
1	Thorax	I1	30.26	25921	-1403.22
1	Thorax	I1	30.26	25919.5	-1405.91
1	Thorax	I1	32.82	25802.7	-1446.04
1	Thorax	I1	32.82	25879.8	-1443.82
1	Thorax	I1	32.82	25865.1	-1445.12
1	Thorax	I1	32.82	25786	-1445.65
1	Thorax	I1	32.82	25842.6	-1446.67
1	Thorax	I1	35.38	25805	-1491.27
1	Thorax	I1	35.38	25821.1	-1489.08
1	Thorax	I1	35.38	25712.9	-1485.58
1	Thorax	I1	35.38	25759	-1482.06
1	Thorax	I1	35.38	25748.2	-1490.01
1	Thorax	I1	37.95	25610.6	-1517.81
1	Thorax	I1	37.95	25670.6	-1519.27
1	Thorax	I1	37.95	25655.5	-1516.8
1	Thorax	I1	37.95	25730.6	-1515.16
1	Thorax	I1	37.95	25730.5	-1519.08
1	Thorax	I1	40.51	25679.8	-1546.72
1	Thorax	I1	40.51	25630.3	-1544.82
1	Thorax	I1	40.51	25615	-1543.73
1	Thorax	I1	40.51	25565.8	-1549.01
1	Thorax	I1	40.51	25693.5	-1549.4
1	Thorax	I1	43.08	25534.5	-1568.85
1	Thorax	I1	43.08	25615.4	-1570.93
1	Thorax	I1	43.08	25546.8	-1573.27
1	Thorax	I1	43.08	25545.2	-1568.28
1	Thorax	I1	43.08	25514.7	-1567.72
1	Thorax	I1	45.64	25517.8	-1590.22
1	Thorax	I1	45.64	25504.8	-1591.09
1	Thorax	I1	45.64	25435.5	-1595.57
1	Thorax	I1	45.64	25543.4	-1585.75
1	Thorax	I1	45.64	25497.4	-1586
1	Thorax	I1	48.21	25418	-1614.53
1	Thorax	I1	48.21	25472.1	-1611.03
1	Thorax	I1	48.21	25457	-1608.82
1	Thorax	I1	48.21	25460.9	-1613.33
1	Thorax	I1	48.21	25425.9	-1609.09
1	Thorax	I1	50.77	25394.8	-1624.87
1	Thorax	I1	50.77	25381.9	-1634.27
1	Thorax	I1	50.77	25379	-1624.96
1	Thorax	I1	50.77	25356.8	-1629.51
1	Thorax	I1	50.77	25352.3	-1623.48
1	Thorax	I1	53.33	25288.5	-1649.68
1	Thorax	I1	53.33	25287	-1645.24
1	Thorax	I1	53.33	25367.7	-1647.39
1	Thorax	I1	53.33	25334.8	-1646.43
1	Thorax	I1	53.33	25350.1	-1646.82
1	Thorax	I1	55.9	25315.4	-1660.11
1	Thorax	I1	55.9	25367.3	-1660.04
1	Thorax	I1	55.9	25256.8	-1658.23
1	Thorax	I1	55.9	25326.5	-1662.71
1	Thorax	I1	55.9	25338	-1661.26
1	Thorax	I1	58.46	25177.6	-1672.48
1	Thorax	I1	58.46	25254.1	-1675.3
1	Thorax	I1	58.46	25178.1	-1681.85
1	Thorax	I1	58.46	25283.8	-1676.8
1	Thorax	I1	58.46	25296.7	-1677.85
1	Thorax	I1	61.03	25190.3	-1691.74
1	Thorax	I1	61.03	25178.9	-1692.54
1	Thorax	I1	61.03	25174.9	-1692.77
1	Thorax	I1	61.03	25190.9	-1687.79
1	Thorax	I1	61.03	25207.2	-1690.65
1	Thorax	I1	63.59	25108.6	-1701.27
1	Thorax	I1	63.59	25193.3	-1706.52
1	Thorax	I1	63.59	25225.5	-1707.26
1	Thorax	I1	63.59	25066.5	-1706.89
1	Thorax	I1	63.59	25215.4	-1705.59
1	Thorax	I1	66.15	25114.4	-1722.73
1	Thorax	I1	66.15	25192.1	-1718.58
1	Thorax	I1	66.15	25128.7	-1719.47
1	Thorax	I1	66.15	25081.3	-1717.97
1	Thorax	I1	66.15	25164.6	-1720
1	Thorax	I1	68.72	25118.1	-1731.3
1	Thorax	I1	68.72	25067.5	-1738.74
1	Thorax	I1	68.72	25107.4	-1733.42
1	Thorax	I1	68.72	25076.4	-1733.05
1	Thorax	I1	68.72	25036.6	-1735.29
1	Thorax	I1	71.28	25068.9	-1747.8
1	Thorax	I1	71.28	25084.3	-1752.91
1	Thorax	I1	71.28	25082.5	-1747.44
1	Thorax	I1	71.28	25054.8	-1744.45
1	Thorax	I1	71.28	24982.9	-1747.82
1	Thorax	I1	73.85	25048.2	-1765.94
1	Thorax	I1	73.85	25046.4	-1765.91
1	Thorax	I1	73.85	25010.3	-1767.83
1	Thorax	I1	73.85	25173.3	-1767.01
1	Thorax	I1	73.85	25054.6	-1762.32
1	Thorax	I1	76.41	25044.9	-1782.18
1	Thorax	I1	76.41	25000.4	-1783.33
1	Thorax	I1	76.41	25025.2	-1782.54
1	Thorax	I1	76.41	25047.8	-1774.53
1	Thorax	I1	76.41	25002	-1777.74
1	Thorax	I1	78.97	24981.4	-1794.81
1	Thorax	I1	78.97	24986.5	-1792.3
1	Thorax	I1	78.97	25021.7	-1799.81
1	Thorax	I1	78.97	24892	-1793.98
1	Thorax	I1	78.97	24968.9	-1794.09
1	Thorax	I1	81.54	24929.2	-1815.83
1	Thorax	I1	81.54	24975.2	-1805.72
1	Thorax	I1	81.54	24952.3	-1804.6
1	Thorax	I1	81.54	24992.8	-1807.36
1	Thorax	I1	81.54	24902	-1809.18
1	Thorax	I1	84.1	24901.9	-1826.26
1	Thorax	I1	84.1	24852.5	-1825.71
1	Thorax	I1	84.1	24950.2	-1830.34
1	Thorax	I1	84.1	24898.6	-1825.92
1	Thorax	I1	84.1	24917.4	-1828.84
1	Thorax	I1	86.67	24883	-1845.16
1	Thorax	I1	86.67	24957.4	-1844.26
1	Thorax	I1	86.67	24927.4	-1844.05
1	Thorax	I1	86.67	24800.6	-1846.81
1	Thorax	I1	86.67	24918.3	-1845.86
1	Thorax	I1	89.23	24892	-1859.97
1	Thorax	I1	89.23	24887.6	-1862.84
1	Thorax	I1	89.23	24910.7	-1859.24
1	Thorax	I1	89.23	24937.2	-1856.56
1	Thorax	I1	89.23	24878.2	-1858.7
1	Thorax	I1	91.79	24847.6	-1876.96
1	Thorax	I1	91.79	24780.6	-1873.57
1	Thorax	I1	91.79	24806.3	-1875.81
1	Thorax	I1	91.79	24810	-1873.26
1	Thorax	I1	91.79	24845.8	-1872.15
1	Thorax	I1	94.36	24902.5	-1889.57
1	Thorax	I1	94.36	24858.6	-1891.31
1	Thorax	I1	94.36	24776.2	-1889.89
1	Thorax	I1	94.36	24908	-1891.74
1	Thorax	I1	94.36	24858.4	-1893.53
1	Thorax	I1	96.92	24777.1	-1908.76
1	Thorax	I1	96.92	24820.9	-1906.79
1	Thorax	I1	96.92	24713.1	-1909.89
1	Thorax	I1	96.92	24831.1	-1913.71
1	Thorax	I1	96.92	24786.4	-1908.44
1	Thorax	I1	99.49	24812.7	-1926.68
1	Thorax	I1	99.49	24754.8	-1926.12
1	Thorax	I1	99.49	24803.5	-1929.23
1	Thorax	I1	99.49	24668.6	-1923.2
1	Thorax	I1	99.49	24791.7	-1923.83
1	Thorax	I1	102.05	24737.2	-1942.29
1	Thorax	I1	102.05	24725.6	-1944.54
1	Thorax	I1	102.05	24751.2	-1947.46
1	Thorax	I1	102.05	24731	-1945.7
1	Thorax	I1	102.05	24715.7	-1942.76
1	Thorax	I1	104.62	24740.8	-1963.58
1	Thorax	I1	104.62	24781.7	-1962.59
1	Thorax	I1	104.62	24757.1	-1960.3
1	Thorax	I1	104.62	24725.3	-1958.98
1	Thorax	I1	104.62	24759.9	-1958.95
1	Thorax	I1	107.18	24782.4	-1973.44
1	Thorax	I1	107.18	24722	-1977.7
1	Thorax	I1	107.18	24724.8	-1974.97
1	Thorax	I1	107.18	24714	-1978.36
1	Thorax	I1	107.18	24648.7	-1974.11
1	Thorax	I1	109.74	24715.6	-1994.87
1	Thorax	I1	109.74	24749.2	-1995.73
1	Thorax	I1	109.74	24675.3	-2000.08
1	Thorax	I1	109.74	24651.8	-1996.91
1	Thorax	I1	109.74	24658.3	-1993.59
1	Thorax	I1	112.31	24579.9	-2013.77
1	Thorax	I1	112.31	24704.6	-2015.16
1	Thorax	I1	112.31	24708.8	-2012.77
1	Thorax	I1	112.31	24673.1	-2012.87
1	Thorax	I1	112.31	24682.5	-2017.92
1	Thorax	I1	114.87	24662	-2032.22
1	Thorax	I1	114.87	24688.8	-2028.91
1	Thorax	I1	114.87	24659.7	-2034.01
1	Thorax	I1	114.87	24677.2	-2034.93
1	Thorax	I1	114.87	24695.8	-2028.44
1	Thorax	I1	117.44	24642.2	-2053.06
1	Thorax	I1	117.44	24607.3	-2050.65
1	Thorax	I1	117.44	24663.3	-2048.78
1	Thorax	I1	117.44	24673.9	-2050.4
1	Thorax	I1	117.44	24598.4	-2050.67
1	Thorax	I1	120	24619.4	-2066.44
1	Thorax	I1	120	24600.1	-2066.24
1	Thorax	I1	120	24643.8	-2066.83
1	Thorax	I1	120	24630.7	-2066.78
1	Thorax	I1	120	24648.4	-2069.14
2	Thorax	I1	20	26835.5	-1165.32
2	Thorax	I1	20	26814.9	-1166.91
2	Thorax	I1	20	26773.5	-1165.55
2	Thorax	I1	20	26835.5	-1164.7
2	Thorax	I1	20	26793.1	-1164.86
2	Thorax	I1	22.56	26694.4	-1249.04
2	Thorax	I1	22.56	26718.2	-1249.49
2	Thorax	I1	22.56	26721.2	-1249.58
2	Thorax	I1	22.56	26673.2	-1248.29
2	Thorax	I1	22.56	26700.7	-1250.79
2	Thorax	I1	25.13	26583.3	-1320.55
2	Thorax	I1	25.13	26580.7	-1320.82
2	Thorax	I1	25.13	26637	-1321.93
2	Thorax	I1	25.13	26614	-1321.33
2	Thorax	I1	25.13	26588	-1320.04
2	Thorax	I1	27.69	26496.8	-1380.01
2	Thorax	I1	27.69	26518.1	-1379.55
2	Thorax	I1	27.69	26511	-1380.48
2	Thorax	I1	27.69	26513.7	-1382.01
2	Thorax	I1	27.69	26489.6	-1381.04
2	Thorax	I1	30.26	26406.9	-1429.12
2	Thorax	I1	30.26	26418.2	-1429.05
2	Thorax	I1	30.26	26411.3	-1432.23
2	Thorax	I1	30.26	26403.5	-1428.41
2	Thorax	I1	30.26	26422.3	-1430.65
2	Thorax	I1	32.82	26332.6	-1470.26
2	Thorax	I1	32.82	26323.2	-1471
2	Thorax	I1	32.82	26321.6	-1473.09
2	Thorax	I1	32.82	26327.3	-1470.42
2	Thorax	I1	32.82	26322.3	-1471.4
2	Thorax	I1	35.38	26238.1	-1506.57
2	Thorax	I1	35.38	26234.4	-1506.89
2	Thorax	I1	35.38	26271.8	-1502.87
2	Thorax	I1	35.38	26258.7	-1506.96
2	Thorax	I1	35.38	26241	-1505.07
2	Thorax	I1	37.95	26155.2	-1537.81
2	Thorax	I1	37.95	26183	-1533.82
2	Thorax	I1	37.95	26169.9	-1535.73
2	Thorax	I1	37.95	26177.8	-1535.79
2	Thorax	I1	37.95	26134.5	-1534.18
2	Thorax	I1	40.51	26087.8	-1561.08
2	Thorax	I1	40.51	26107	-1562.65
2	Thorax	I1	40.51	26095.3	-1560.56
2	Thorax	I1	40.51	26092.7	-1561.58
2	Thorax	I1	40.51	26118.8	-1561.99
2	Thorax	I1	43.08	26033.1	-1581.79
2	Thorax	I1	43.08	26031.6	-1583.37
2	Thorax	I1	43.08	26039.5	-1585.67
2	Thorax	I1	43.08	26033.4	-1582.87
2	Thorax	I1	43.08	26048.8	-1582.2
2	Thorax	I1	45.64	25987.4	-1602.49
2	Thorax	I1	45.64	26003	-1603.91
2	Thorax	I1	45.64	25958.2	-1601.92
2	Thorax	I1	45.64	25984.3	-1603.09
2	Thorax	I1	45.64	25954.5	-1603.26
2	Thorax	I1	48.21	25922.5	-1620.66
2	Thorax	I1	48.21	25924.2	-1620.24
2	Thorax	I1	48.21	25913	-1621.09
2	Thorax	I1	48.21	25909.4	-1621.94
2	Thorax	I1	48.21	25920.6	-1621.32
2	Thorax	I1	50.77	25871.2	-1637.03
2	Thorax	I1	50.77	25867.1	-1635.13
2	Thorax	I1	50.77	25861.7	-1635.13
2	Thorax	I1	50.77	25861.6	-1637.22
2	Thorax	I1	50.77	25852.3	-1638.09
2	Thorax	I1	53.33	25796.7	-1649.39
2	Thorax	I1	53.33	25807.1	-1650.04
2	Thorax	I1	53.33	25843	-1651.63
2	Thorax	I1	53.33	25801.6	-1653.72
2	Thorax	I1	53.33	25811.2	-1654.79
2	Thorax	I1	55.9	25773.3	-1667.83
2	Thorax	I1	55.9	25751.7	-1668.17
2	Thorax	I1	55.9	25784.8	-1668.01
2	Thorax	I1	55.9	25777.8	-1666.31
2	Thorax	I1	55.9	25769.6	-1666.13
2	Thorax	I1	58.46	25752.8	-1684.47
2	Thorax	I1	58.46	25716.8	-1679.26
2	Thorax	I1	58.46	25740.5	-1678.79
2	Thorax	I1	58.46	25747.7	-1683.62
2	Thorax	I1	58.46	25731.2	-1681.94
2	Thorax	I1	61.03	25693	-1696.1
2	Thorax	I1	61.03	25690.8	-1694.29
2	Thorax	I1	61.03	25662.3	-1697.41
2	Thorax	I1	61.03	25692.3	-1698.12
2	Thorax	I1	61.03	25684.2	-1697.45
2	Thorax	I1	63.59	25646.6	-1711.05
2	Thorax	I1	63.59	25650.9	-1710.69
2	Thorax	I1	63.59	25664.8	-1711.37
2	Thorax	I1	63.59	25648.7	-1708.14
2	Thorax	I1	63.59	25657.1	-1712.84
2	Thorax	I1	66.15	25605.1	-1720.83
2	Thorax	I1	66.15	25619.3	-1723.39
2	Thorax	I1	66.15	25611.3	-1724.27
2	Thorax	I1	66.15	25628.4	-1723.04
2	Thorax	I1	66.15	25632.3	-1722.82
2	Thorax	I1	68.72	25567.7	-1739.37
2	Thorax	I1	68.72	25599.5	-1737.42
2	Thorax	I1	68.72	25578.1	-1736.33
2	Thorax	I1	68.72	25566.2	-1736.98
2	Thorax	I1	68.72	25593.5	-1739.83
2	Thorax	I1	71.28	25532.8	-1751.66
2	Thorax	I1	71.28	25525	-1754.74
2	Thorax	I1	71.28	25563.4	-1750.77
2	Thorax	I1	71.28	25558.2	-1753.8
2	Thorax	I1	71.28	25551.2	-1750.66
2	Thorax	I1	73.85	25512.4	-1765.24
2	Thorax	I1	73.85	25521.2	-1765.53
2	Thorax	I1	73.85	25526.9	-1765.06
2	Thorax	I1	73.85	25532.8	-1767.07
2	Thorax	I1	73.85	25513.9	-1763.89
2	Thorax	I1	76.41	25482.9	-1783.5
2	Thorax	I1	76.41	25493.6	-1782.23
2	Thorax	I1	76.41	25491.4	-1780.15
2	Thorax	I1	76.41	25488.5	-1781.39
2	Thorax	I1	76.41	25488.7	-1780.32
2	Thorax	I1	78.97	25477.9	-1797.14
2	Thorax	I1	78.97	25454	-1797.36
2	Thorax	I1	78.97	25456.5	-1797.94
2	Thorax	I1	78.97	25458.2	-1797.41
2	Thorax	I1	78.97	25478.6	-1794.24
2	Thorax	I1	81.54	25433.3	-1811.85
2	Thorax	I1	81.54	25455.5	-1812.41
2	Thorax	I1	81.54	25432.3	-1811.96
2	Thorax	I1	81.54	25426.5	-1812.31
2	Thorax	I1	81.54	25437.6	-1813.08
2	Thorax	I1	84.1	25406.6	-1827.73
2	Thorax	I1	84.1	25410	-1827.92
2	Thorax	I1	84.1	25400.9	-1829.46
2	Thorax	I1	84.1	25431.8	-1827.55
2	Thorax	I1	84.1	25417.4	-1827.61
2	Thorax	I1	86.67	25375.3	-1843.27
2	Thorax	I1	86.67	25381.3	-1844.79
2	Thorax	I1	86.67	25378.2	-1848.86
2	Thorax	I1	86.67	25370.7	-1847.67
2	Thorax	I1	86.67	25367.8	-1844.11
2	Thorax	I1	89.23	25370.4	-1859.73
2	Thorax	I1	89.23	25373.9	-1857.36
2	Thorax	I1	89.23	25360.3	-1860.66
2	Thorax	I1	89.23	25394.8	-1859.46
2	Thorax	I1	89.23	25372	-1860.07
2	Thorax	I1	91.79	25357.1	-1879.35
2	Thorax	I1	91.79	25328.5	-1879.72
2	Thorax	I1	91.79	25340.7	-1876.85
2	Thorax	I1	91.79	25348.4	-1877.6
2	Thorax	I1	91.79	25338.9	-1875.53
2	Thorax	I1	94.36	25318.5	-1893.73
2	Thorax	I1	94.36	25317.8	-1894.46
2	Thorax	I1	94.36	25309	-1893.77
2	Thorax	I1	94.36	25328.1	-1894.57
2	Thorax	I1	94.36	25322.6	-1893.86
2	Thorax	I1	96.92	25295.1	-1913.1
2	Thorax	I1	96.92	25292.7	-1911.83
2	Thorax	I1	96.92	25313.9	-1912.62
2	Thorax	I1	96.92	25308.7	-1912.69
2	Thorax	I1	96.92	25306.2	-1911.3
2	Thorax	I1	99.49	25265.1	-1928.59
2	Thorax	I1	99.49	25273.4	-1929.17
2	Thorax	I1	99.49	25280.5	-1928.63
2	Thorax	I1	99.49	25271	-1931.46
2	Thorax	I1	99.49	25289.5	-1925.9
2	Thorax	I1	102.05	25262.2	-1948.45
2	Thorax	I1	102.05	25275.2	-1946.44
2	Thorax	I1	102.05	25272.4	-1945.03
2	Thorax	I1	102.05	25284.2	-1948.04
2	Thorax	I1	102.05	25261.2	-1947.17
2	Thorax	I1	104.62	25215.8	-1966.24
2	Thorax	I1	104.62	25228.5	-1963.33
2	Thorax	I1	104.62	25206.5	-1961.73
2	Thorax	I1	104.62	25232	-1964.92
2	Thorax	I1	104.62	25226.5	-1962.38
2	Thorax	I1	107.18	25228.7	-1984.35
2	Thorax	I1	107.18	25208.2	-1982.15
2	Thorax	I1	107.18	25214.8	-1980.56
2	Thorax	I1	107.18	25227.7	-1981.29
2	Thorax	I1	107.18	25209.2	-1981.52
2	Thorax	I1	109.74	25198.7	-2001.74
2	Thorax	I1	109.74	25207.8	-2000.52
2	Thorax	I1	109.74	25200.1	-1999.65
2	Thorax	I1	109.74	25178.7	-2003.73
2	Thorax	I1	109.74	25175.9	-2001.94
2	Thorax	I1	112.31	25176	-2018.08
2	Thorax	I1	112.31	25164.1	-2015.83
2	Thorax	I1	112.31	25179.8	-2018.27
2	Thorax	I1	112.31	25183.4	-2021.37
2	Thorax	I1	112.31	25165.3	-2019.64
2	Thorax	I1	114.87	25149.2	-2035.55
2	Thorax	I1	114.87	25145.8	-2032.82
2	Thorax	I1	114.87	25161.8	-2035.51
2	Thorax	I1	114.87	25157.9	-2037.01
2	Thorax	I1	114.87	25160.3	-2036.35
2	Thorax	I1	117.44	25141.9	-2055.46
2	Thorax	I1	117.44	25148.1	-2054.86
2	Thorax	I1	117.44	25143.7	-2054.82
2	Thorax	I1	117.44	25143	-2057.29
2	Thorax	I1	117.44	25139.9	-2059.09
2	Thorax	I1	120	25154	-2074.86
2	Thorax	I1	120	25117	-2075.03
2	Thorax	I1	120	25108.4	-2074.28
2	Thorax	I1	120	25141.6	-2074.16
2	Thorax	I1	120	25113.5	-2072.17
3	Thorax	I1	20	26867.3	-983.56
3	Thorax	I1	20	26942.6	-984.15
3	Thorax	I1	20	26862	-983.36
3	Thorax	I1	20	26890.7	-983.21
3	Thorax	I1	20	26916.4	-982.71
3	Thorax	I1	22.56	26845.5	-1077.58
3	Thorax	I1	22.56	26795.5	-1077.1
3	Thorax	I1	22.56	26853.1	-1077.57
3	Thorax	I1	22.56	26890.2	-1076.54
3	Thorax	I1	22.56	26836	-1077.6
3	Thorax	I1	25.13	26744.6	-1163.57
3	Thorax	I1	25.13	26805.4	-1161.73
3	Thorax	I1	25.13	26667.1	-1163.37
3	Thorax	I1	25.13	26772.5	-1162.97
3	Thorax	I1	25.13	26716.5	-1162.04
3	Thorax	I1	27.69	26710.6	-1241.18
3	Thorax	I1	27.69	26686.3	-1240.5
3	Thorax	I1	27.69	26655.5	-1239.56
3	Thorax	I1	27.69	26708.5	-1241.35
3	Thorax	I1	27.69	26650.1	-1240.76
3	Thorax	I1	30.26	26567.8	-1310.71
3	Thorax	I1	30.26	26534.7	-1311.81
3	Thorax	I1	30.26	26624.9	-1312
3	Thorax	I1	30.26	26573.6	-1310.27
3	Thorax	I1	30.26	26585.8	-1311.34
3	Thorax	I1	32.82	26516.8	-1375.24
3	Thorax	I1	32.82	26573	-1373.31
3	Thorax	I1	32.82	26480.2	-1372.14
3	Thorax	I1	32.82	26539	-1374.21
3	Thorax	I1	32.82	26552.9	-1373.37
3	Thorax	I1	35.38	26459.3	-1430.47
3	Thorax	I1	35.38	26452.7	-1431.75
3	Thorax	I1	35.38	26464.8	-1429.66
3	Thorax	I1	35.38	26474.4	-1430.18
3	Thorax	I1	35.38	26411	-1429.18
3	Thorax	I1	37.95	26346.2	-1481.5
3	Thorax	I1	37.95	26365.2	-1481.07
3	Thorax	I1	37.95	26361.9	-1482.39
3	Thorax	I1	37.95	26356	-1483.76
3	Thorax	I1	37.95	26432.1	-1483.24
3	Thorax	I1	40.51	26264.7	-1528.83
3	Thorax	I1	40.51	26374.2	-1528.59
3	Thorax	I1	40.51	26319.7	-1528.11
3	Thorax	I1	40.51	26391.4	-1527.52
3	Thorax	I1	40.51	26341	-1528.55
3	Thorax	I1	43.08	26260.8	-1568.74
3	Thorax	I1	43.08	26217.2	-1569.75
3	Thorax	I1	43.08	26192.6	-1568.83
3	Thorax	I1	43.08	26209.2	-1571.35
3	Thorax	I1	43.08	26187.3	-1570.44
3	Thorax	I1	45.64	26154.4	-1606.74
3	Thorax	I1	45.64	26209.1	-1609.01
3	Thorax	I1	45.64	26139	-1606.55
3	Thorax	I1	45.64	26164.3	-1608.39
3	Thorax	I1	45.64	26255	-1608
3	Thorax	I1	48.21	26302.1	-1643.21
3	Thorax	I1	48.21	26199	-1642.62
3	Thorax	I1	48.21	26147.8	-1640.67
3	Thorax	I1	48.21	26111.6	-1641.68
3	Thorax	I1	48.21	26152.2	-1640
3	Thorax	I1	50.77	26104.4	-1673.02
3	Thorax	I1	50.77	26099.9	-1674.31
3	Thorax	I1	50.77	26028.4	-1673.25
3	Thorax	I1	50.77	26149.3	-1673.94
3	Thorax	I1	50.77	26084	-1674.87
3	Thorax	I1	53.33	26079.4	-1703.73
3	Thorax	I1	53.33	26051.5	-1703.07
3	Thorax	I1	53.33	26001.7	-1703.72
3	Thorax	I1	53.33	25991.8	-1705.59
3	Thorax	I1	53.33	26048.2	-1704.07
3	Thorax	I1	55.9	26040.9	-1727.63
3	Thorax	I1	55.9	25951.7	-1730.4
3	Thorax	I1	55.9	25998.3	-1730.18
3	Thorax	I1	55.9	26006	-1732.3
3	Thorax	I1	55.9	25987.4	-1730.2
3	Thorax	I1	58.46	26020.4	-1755.96
3	Thorax	I1	58.46	25987.9	-1753.9
3	Thorax	I1	58.46	25916.3	-1755.23
3	Thorax	I1	58.46	25833.4	-1755.8
3	Thorax	I1	58.46	25949.7	-1755.09
3	Thorax	I1	61.03	25861.8	-1779.41
3	Thorax	I1	61.03	25802.3	-1779.98
3	Thorax	I1	61.03	25938.1	-1777.53
3	Thorax	I1	61.03	25804.4	-1779.73
3	Thorax	I1	61.03	25942.7	-1778.37
3	Thorax	I1	63.59	25857	-1801.65
3	Thorax	I1	63.59	25923.7	-1803.26
3	Thorax	I1	63.59	25827.6	-1803.28
3	Thorax	I1	63.59	25846.8	-1802.95
3	Thorax	I1	63.59	25792.3	-1804
3	Thorax	I1	66.15	25792.9	-1822.3
3	Thorax	I1	66.15	25774.6	-1823.87
3	Thorax	I1	66.15	25715.6	-1824.15
3	Thorax	I1	66.15	25815.6	-1822.35
3	Thorax	I1	66.15	25785.8	-1823.19
3	Thorax	I1	68.72	25769.9	-1844.19
3	Thorax	I1	68.72	25727.9	-1844.3
3	Thorax	I1	68.72	25742.9	-1845.51
3	Thorax	I1	68.72	25777.5	-1844.66
3	Thorax	I1	68.72	25720.7	-1843.38
3	Thorax	I1	71.28	25626.2	-1865.21
3	Thorax	I1	71.28	25672	-1865.76
3	Thorax	I1	71.28	25677.2	-1864.9
3	Thorax	I1	71.28	25684.5	-1865.19
3	Thorax	I1	71.28	25768.3	-1864.66
3	Thorax	I1	73.85	25674.9	-1884.86
3	Thorax	I1	73.85	25689.7	-1884.61
3	Thorax	I1	73.85	25660.3	-1886.33
3	Thorax	I1	73.85	25679.6	-1884.16
3	Thorax	I1	73.85	25694	-1885.78
3	Thorax	I1	76.41	25658.2	-1904.78
3	Thorax	I1	76.41	25609.1	-1902.87
3	Thorax	I1	76.41	25661.7	-1904.52
3	Thorax	I1	76.41	25615.7	-1903.92
3	Thorax	I1	76.41	25629.1	-1905.27
3	Thorax	I1	78.97	25586.3	-1924.25
3	Thorax	I1	78.97	25591.1	-1922.65
3	Thorax	I1	78.97	25600.8	-1923.72
3	Thorax	I1	78.97	25595.7	-1922.22
3	Thorax	I1	78.97	25596.7	-1922.28
3	Thorax	I1	81.54	25514.4	-1941.66
3	Thorax	I1	81.54	25595.1	-1944.26
3	Thorax	I1	81.54	25623.8	-1940.88
3	Thorax	I1	81.54	25636.3	-1942.47
3	Thorax	I1	81.54	25534.4	-1942.08
3	Thorax	I1	84.1	25554	-1962.07
3	Thorax	I1	84.1	25583.4	-1961.03
3	Thorax	I1	84.1	25560.9	-1963.15
3	Thorax	I1	84.1	25544.8	-1961.12
3	Thorax	I1	84.1	25557.4	-1960.33
3	Thorax	I1	86.67	25571.2	-1979.7
3	Thorax	I1	86.67	25480.2	-1976.73
3	Thorax	I1	86.67	25530.5	-1978.42
3	Thorax	I1	86.67	25579.4	-1978.48
3	Thorax	I1	86.67	25520	-1978.87
3	Thorax	I1	89.23	25490.7	-1995.71
3	Thorax	I1	89.23	25568.9	-1998.61
3	Thorax	I1	89.23	25465.7	-1996.74
3	Thorax	I1	89.23	25491.6	-1996.08
3	Thorax	I1	89.23	25463.1	-1998.88
3	Thorax	I1	91.79	25483	-2015.22
3	Thorax	I1	91.79	25426.1	-2012.39
3	Thorax	I1	91.79	25497.1	-2017.14
3	Thorax	I1	91.79	25454.2	-2014.14
3	Thorax	I1	91.79	25471.4	-2016.34
3	Thorax	I1	94.36	25529.6	-2035.24
3	Thorax	I1	94.36	25424	-2033.65
3	Thorax	I1	94.36	25451	-2033.97
3	Thorax	I1	94.36	25420.6	-2032.71
3	Thorax	I1	94.36	25446.3	-2034.46
3	Thorax	I1	96.92	25407.8	-2052.48
3	Thorax	I1	96.92	25377.5	-2050.8
3	Thorax	I1	96.92	25372	-2050.23
3	Thorax	I1	96.92	25366	-2050.23
3	Thorax	I1	96.92	25471.5	-2049.78
3	Thorax	I1	99.49	25344.1	-2067.07
3	Thorax	I1	99.49	25435.5	-2070.79
3	Thorax	I1	99.49	25330.5	-2070.69
3	Thorax	I1	99.49	25379.5	-2070.79
3	Thorax	I1	99.49	25416.6	-2068.88
3	Thorax	I1	102.05	25341.5	-2086.67
3	Thorax	I1	102.05	25312.4	-2088.78
3	Thorax	I1	102.05	25328.8	-2088.67
3	Thorax	I1	102.05	25343.5	-2086.14
3	Thorax	I1	102.05	25372	-2088.93
3	Thorax	I1	104.62	25306.6	-2106.51
3	Thorax	I1	104.62	25363.7	-2108.47
3	Thorax	I1	104.62	25313.8	-2102.81
3	Thorax	I1	104.62	25277.6	-2104.01
3	Thorax	I1	104.62	25340.3	-2106.3
3	Thorax	I1	107.18	25318.5	-2124.73
3	Thorax	I1	107.18	25329.1	-2122.62
3	Thorax	I1	107.18	25331.8	-2126.62
3	Thorax	I1	107.18	25251.8	-2125.89
3	Thorax	I1	107.18	25312.8	-2123.67
3	Thorax	I1	109.74	25206	-2142.56
3	Thorax	I1	109.74	25283.3	-2144.19
3	Thorax	I1	109.74	25325.5	-2140.15
3	Thorax	I1	109.74	25271.2	-2140.41
3	Thorax	I1	109.74	25259.4	-2142.2
3	Thorax	I1	112.31	25240.6	-2159.32
3	Thorax	I1	112.31	25191.2	-2160.21
3	Thorax	I1	112.31	25267	-2159.56
3	Thorax	I1	112.31	25293	-2160.27
3	Thorax	I1	112.31	25233.4	-2160.13
3	Thorax	I1	114.87	25228.9	-2180.83
3	Thorax	I1	114.87	25241	-2179.67
3	Thorax	I1	114.87	25260.8	-2177.52
3	Thorax	I1	114.87	25255.4	-2176.82
3	Thorax	I1	114.87	25191.9	-2177.55
3	Thorax	I1	117.44	25301.4	-2196.64
3	Thorax	I1	117.44	25140.1	-2194.96
3	Thorax	I1	117.44	25206.9	-2195.57
3	Thorax	I1	117.44	25271.1	-2197.95
3	Thorax	I1	117.44	25196.8	-2195.4
3	Thorax	I1	120	25172.8	-2216.88
3	Thorax	I1	120	25269.9	-2216.96
3	Thorax	I1	120	25203.2	-2216.54
3	Thorax	I1	120	25176.4	-2215.68
3	Thorax	I1	120	25155.7	-2214.55
4	Thorax	I1	20	26525.6	-1111.23
4	Thorax	I1	20	26487.3	-1110.43
4	Thorax	I1	20	26555.2	-1104.55
4	Thorax	I1	20	26559.2	-1109.93
4	Thorax	I1	20	26565.2	-1110.79
4	Thorax	I1	22.56	26412.9	-1193.36
4	Thorax	I1	22.56	26388.4	-1189.45
4	Thorax	I1	22.56	26490.9	-1189.68
4	Thorax	I1	22.56	26511.9	-1191.95
4	Thorax	I1	22.56	26459.9	-1192.16
4	Thorax	I1	25.13	26271	-1259.46
4	Thorax	I1	25.13	26430.5	-1261.91
4	Thorax	I1	25.13	26380.5	-1258.66
4	Thorax	I1	25.13	26400.5	-1261.81
4	Thorax	I1	25.13	26323.1	-1256.48
4	Thorax	I1	27.69	26234.4	-1321.01
4	Thorax	I1	27.69	26280.2	-1314.18
4	Thorax	I1	27.69	26307	-1315.15
4	Thorax	I1	27.69	26221.7	-1320.18
4	Thorax	I1	27.69	26312.8	-1318.37
4	Thorax	I1	30.26	26221.8	-1363.65
4	Thorax	I1	30.26	26228.8	-1360.19
4	Thorax	I1	30.26	26158.5	-1365.58
4	Thorax	I1	30.26	26156.1	-1368.82
4	Thorax	I1	30.26	26149.2	-1366.77
4	Thorax	I1	32.82	26100.6	-1403.94
4	Thorax	I1	32.82	26166.5	-1409.11
4	Thorax	I1	32.82	26091	-1412.6
4	Thorax	I1	32.82	26110.3	-1403.27
4	Thorax	I1	32.82	26077.2	-1403.98
4	Thorax	I1	35.38	25979.6	-1438.9
4	Thorax	I1	35.38	26009.9	-1447.48
4	Thorax	I1	35.38	25995.6	-1442.58
4	Thorax	I1	35.38	25950.4	-1443.98
4	Thorax	I1	35.38	26065.9	-1440.5
4	Thorax	I1	37.95	25990	-1468.88
4	Thorax	I1	37.95	25996.5	-1467.94
4	Thorax	I1	37.95	25914.8	-1470.79
4	Thorax	I1	37.95	26023.2	-1465.96
4	Thorax	I1	37.95	25969.9	-1473.7
4	Thorax	I1	40.51	25850.1	-1493.7
4	Thorax	I1	40.51	25852.4	-1493.5
4	Thorax	I1	40.51	25922	-1493.38
4	Thorax	I1	40.51	25894.8	-1496.79
4	Thorax	I1	40.51	25816.4	-1495.58
4	Thorax	I1	43.08	25882.2	-1517.53
4	Thorax	I1	43.08	25838.7	-1516.72
4	Thorax	I1	43.08	25806.8	-1513.08
4	Thorax	I1	43.08	25813.6	-1520.77
4	Thorax	I1	43.08	25864	-1521.13
4	Thorax	I1	45.64	25723.3	-1538.65
4	Thorax	I1	45.64	25752.9	-1546.09
4	Thorax	I1	45.64	25731.3	-1539.87
4	Thorax	I1	45.64	25779.9	-1535.22
4	Thorax	I1	45.64	25819.7	-1536.21
4	Thorax	I1	48.21	25768.3	-1558.18
4	Thorax	I1	48.21	25663.3	-1557.15
4	Thorax	I1	48.21	25701.5	-1555.07
4	Thorax	I1	48.21	25736.2	-1553.67
4	Thorax	I1	48.21	25750.8	-1557.91
4	Thorax	I1	50.77	25662.5	-1574.71
4	Thorax	I1	50.77	25591.6	-1571.11
4	Thorax	I1	50.77	25595.7	-1572.41
4	Thorax	I1	50.77	25636	-1569.95
4	Thorax	I1	50.77	25621.2	-1569.07
4	Thorax	I1	53.33	25626.9	-1591.34
4	Thorax	I1	53.33	25539.5	-1586.44
4	Thorax	I1	53.33	25562	-1584.74
4	Thorax	I1	53.33	25644.2	-1581.94
4	Thorax	I1	53.33	25631.3	-1590.45
4	Thorax	I1	55.9	25652.8	-1599.2
4	Thorax	I1	55.9	25570.2	-1602.14
4	Thorax	I1	55.9	25544	-1599.35
4	Thorax	I1	55.9	25538.2	-1602.95
4	Thorax	I1	55.9	25536.1	-1601.88
4	Thorax	I1	58.46	25509.4	-1617.61
4	Thorax	I1	58.46	25524.1	-1611.98
4	Thorax	I1	58.46	25588.8	-1614.8
4	Thorax	I1	58.46	25492.8	-1613.54
4	Thorax	I1	58.46	25559.5	-1619.09
4	Thorax	I1	61.03	25503.5	-1635.25
4	Thorax	I1	61.03	25528.9	-1630.7
4	Thorax	I1	61.03	25522.2	-1632.72
4	Thorax	I1	61.03	25461.8	-1631.18
4	Thorax	I1	61.03	25407.6	-1627.16
4	Thorax	I1	63.59	25416.6	-1644.55
4	Thorax	I1	63.59	25423.8	-1643.32
4	Thorax	I1	63.59	25448.7	-1644.41
4	Thorax	I1	63.59	25440.8	-1644.32
4	Thorax	I1	63.59	25415.6	-1643.29
4	Thorax	I1	66.15	25364.4	-1655.04
4	Thorax	I1	66.15	25449	-1661.1
4	Thorax	I1	66.15	25501.9	-1658.64
4	Thorax	I1	66.15	25361.5	-1658.23
4	Thorax	I1	66.15	25392.8	-1660.85
4	Thorax	I1	68.72	25413.4	-1675.02
4	Thorax	I1	68.72	25403.1	-1674.77
4	Thorax	I1	68.72	25352.5	-1670.8
4	Thorax	I1	68.72	25377.8	-1675.07
4	Thorax	I1	68.72	25407.9	-1671.54
4	Thorax	I1	71.28	25385.5	-1685.2
4	Thorax	I1	71.28	25331.6	-1684.72
4	Thorax	I1	71.28	25329.7	-1681.81
4	Thorax	I1	71.28	25311	-1688.33
4	Thorax	I1	71.28	25364.5	-1686.32
4	Thorax	I1	73.85	25253.3	-1701.73
4	Thorax	I1	73.85	25380	-1698.23
4	Thorax	I1	73.85	25281.8	-1702.73
4	Thorax	I1	73.85	25319.9	-1700.71
4	Thorax	I1	73.85	25302.9	-1700.63
4	Thorax	I1	76.41	25239	-1714.42
4	Thorax	I1	76.41	25243.6	-1712.56
4	Thorax	I1	76.41	25307.9	-1714.33
4	Thorax	I1	76.41	25305.7	-1712.08
4	Thorax	I1	76.41	25267.1	-1711.9
4	Thorax	I1	78.97	25255.6	-1730.47
4	Thorax	I1	78.97	25269.3	-1730.78
4	Thorax	I1	78.97	25285.9	-1726.2
4	Thorax	I1	78.97	25276.1	-1726.65
4	Thorax	I1	78.97	25300.8	-1730.18
4	Thorax	I1	81.54	25297.2	-1747.76
4	Thorax	I1	81.54	25232.3	-1738.68
4	Thorax	I1	81.54	25257.4	-1744.43
4	Thorax	I1	81.54	25312.8	-1741.76
4	Thorax	I1	81.54	25247.8	-1751.06
4	Thorax	I1	84.1	25161.3	-1759.99
4	Thorax	I1	84.1	25226.8	-1756.3
4	Thorax	I1	84.1	25197	-1759.75
4	Thorax	I1	84.1	25214.3	-1759.98
4	Thorax	I1	84.1	25204.1	-1761.02
4	Thorax	I1	86.67	25198.3	-1775.99
4	Thorax	I1	86.67	25207.6	-1778.09
4	Thorax	I1	86.67	25264.3	-1777.53
4	Thorax	I1	86.67	25213.8	-1776.96
4	Thorax	I1	86.67	25226.4	-1775.84
4	Thorax	I1	89.23	25107.1	-1791.52
4	Thorax	I1	89.23	25198.1	-1794.21
4	Thorax	I1	89.23	25095.6	-1791.67
4	Thorax	I1	89.23	25161.4	-1792.11
4	Thorax	I1	89.23	25183.4	-1794.43
4	Thorax	I1	91.79	25152	-1804.3
4	Thorax	I1	91.79	25106.8	-1805.86
4	Thorax	I1	91.79	25148.5	-1810.38
4	Thorax	I1	91.79	25184.4	-1807.69
4	Thorax	I1	91.79	25131	-1806.77
4	Thorax	I1	94.36	25146.2	-1828.5
4	Thorax	I1	94.36	25106.7	-1826.57
4	Thorax	I1	94.36	25165.3	-1827.97
4	Thorax	I1	94.36	25180.7	-1820.23
4	Thorax	I1	94.36	25114.2	-1825.98
4	Thorax	I1	96.92	25109.5	-1837.98
4	Thorax	I1	96.92	25062.3	-1843.58
4	Thorax	I1	96.92	25178.3	-1844.18
4	Thorax	I1	96.92	25082.8	-1840.62
4	Thorax	I1	96.92	25056.2	-1845.49
4	Thorax	I1	99.49	25094.7	-1859.58
4	Thorax	I1	99.49	25159.7	-1862.44
4	Thorax	I1	99.49	25034.5	-1856.73
4	Thorax	I1	99.49	25094.8	-1859.73
4	Thorax	I1	99.49	25103	-1859.53
4	Thorax	I1	102.05	25008.3	-1876.37
4	Thorax	I1	102.05	25067.6	-1874.38
4	Thorax	I1	102.05	25056.7	-1879.78
4	Thorax	I1	102.05	25063.3	-1873.74
4	Thorax	I1	102.05	25168.7	-1880.98
4	Thorax	I1	104.62	25065.9	-1893.93
4	Thorax	I1	104.62	25069.9	-1895.63
4	Thorax	I1	104.62	25076.4	-1892.74
4	Thorax	I1	104.62	25062.8	-1896.87
4	Thorax	I1	104.62	25062	-1895.25
4	Thorax	I1	107.18	25039.5	-1914.83
4	Thorax	I1	107.18	24989.3	-1913.73
4	Thorax	I1	107.18	25088.2	-1911.12
4	Thorax	I1	107.18	25022	-1912.4
4	Thorax	I1	107.18	25001.5	-1909.39
4	Thorax	I1	109.74	24998.6	-1929.17
4	Thorax	I1	109.74	25018.2	-1926.76
4	Thorax	I1	109.74	24989.1	-1930.53
4	Thorax	I1	109.74	25090.9	-1933.03
4	Thorax	I1	109.74	24983.8	-1929.35
4	Thorax	I1	112.31	24983.6	-1950.84
4	Thorax	I1	112.31	25099.8	-1949.17
4	Thorax	I1	112.31	25033.6	-1946.12
4	Thorax	I1	112.31	24997.9	-1948.62
4	Thorax	I1	112.31	24950.4	-1952.37
4	Thorax	I1	114.87	25008.9	-1965.38
4	Thorax	I1	114.87	25042.4	-1967.65
4	Thorax	I1	114.87	24961.3	-1964.22
4	Thorax	I1	114.87	24974.6	-1969.38
4	Thorax	I1	114.87	24951.8	-1966.61
4	Thorax	I1	117.44	24960.5	-1985.34
4	Thorax	I1	117.44	24965.2	-1979.49
4	Thorax	I1	117.44	24974	-1981.84
4	Thorax	I1	117.44	24919.8	-1986.25
4	Thorax	I1	117.44	24940.4	-1983.49
4	Thorax	I1	120	24922.7	-2003.13
4	Thorax	I1	120	24887.1	-2002.73
4	Thorax	I1	120	24943	-2003.87
4	Thorax	I1	120	24927	-1998.2
4	Thorax	I1	120	24939.7	-2002.37
5	Thorax	I1	20	27208.1	-1185.76
5	Thorax	I1	20	27233.6	-1190.36
5	Thorax	I1	20	27227.6	-1193.6
5	Thorax	I1	20	27207.1	-1186.4
5	Thorax	I1	20	27228.8	-1193.37
5	Thorax	I1	22.56	27112.8	-1274.25
5	Thorax	I1	22.56	27104.2	-1280.36
5	Thorax	I1	22.56	27112	-1277.62
5	Thorax	I1	22.56	27153.7	-1278.94
5	Thorax	I1	22.56	27086.2	-1274.95
5	Thorax	I1	25.13	27019.5	-1344.82
5	Thorax	I1	25.13	27016.5	-1348.01
5	Thorax	I1	25.13	27000.1	-1351.43
5	Thorax	I1	25.13	27021.4	-1345.14
5	Thorax	I1	25.13	26997.3	-1344.46
5	Thorax	I1	27.69	26924.8	-1411.4
5	Thorax	I1	27.69	26915.2	-1404.48
5	Thorax	I1	27.69	26922.7	-1410.5
5	Thorax	I1	27.69	26919.4	-1412.63
5	Thorax	I1	27.69	26937.8	-1411.11
5	Thorax	I1	30.26	26823.5	-1461.05
5	Thorax	I1	30.26	26822.5	-1461.32
5	Thorax	I1	30.26	26849.9	-1455.91
5	Thorax	I1	30.26	26845.1	-1459.99
5	Thorax	I1	30.26	26837.2	-1455.82
5	Thorax	I1	32.82	26738	-1504.87
5	Thorax	I1	32.82	26709.3	-1502.42
5	Thorax	I1	32.82	26734.5	-1500.97
5	Thorax	I1	32.82	26750.6	-1506.86
5	Thorax	I1	32.82	26739.1	-1503.08
5	Thorax	I1	35.38	26664.1	-1538.43
5	Thorax	I1	35.38	26644.2	-1542.57
5	Thorax	I1	35.38	26656.7	-1539.16
5	Thorax	I1	35.38	26671.3	-1533.77
5	Thorax	I1	35.38	26651.9	-1537.91
5	Thorax	I1	37.95	26570.9	-1573.4
5	Thorax	I1	37.95	26593.9	-1564.15
5	Thorax	I1	37.95	26556.6	-1570.95
5	Thorax	I1	37.95	26554.7	-1572.17
5	Thorax	I1	37.95	26580.4	-1562.59
5	Thorax	I1	40.51	26513.9	-1598.35
5	Thorax	I1	40.51	26528.3	-1595.71
5	Thorax	I1	40.51	26529.1	-1590.06
5	Thorax	I1	40.51	26499.9	-1597.46
5	Thorax	I1	40.51	26503	-1598.42
5	Thorax	I1	43.08	26452.9	-1619.12
5	Thorax	I1	43.08	26454.4	-1619.13
5	Thorax	I1	43.08	26418.2	-1622.01
5	Thorax	I1	43.08	26427	-1617.82
5	Thorax	I1	43.08	26455.3	-1613.38
5	Thorax	I1	45.64	26377.2	-1638.9
5	Thorax	I1	45.64	26374.4	-1640.74
5	Thorax	I1	45.64	26376.1	-1639.4
5	Thorax	I1	45.64	26364.1	-1639.54
5	Thorax	I1	45.64	26380	-1639.12
5	Thorax	I1	48.21	26310.4	-1658.43
5	Thorax	I1	48.21	26297.1	-1655.65
5	Thorax	I1	48.21	26335.5	-1656.11
5	Thorax	I1	48.21	26297	-1660.92
5	Thorax	I1	48.21	26324.6	-1659.65
5	Thorax	I1	50.77	26250.7	-1670.48
5	Thorax	I1	50.77	26272.8	-1672.41
5	Thorax	I1	50.77	26259.1	-1672.89
5	Thorax	I1	50.77	26253.5	-1675.14
5	Thorax	I1	50.77	26252.2	-1672.36
5	Thorax	I1	53.33	26201.1	-1688.54
5	Thorax	I1	53.33	26206.5	-1688.75
5	Thorax	I1	53.33	26232.3	-1689.85
5	Thorax	I1	53.33	26223.7	-1689.51
5	Thorax	I1	53.33	26199.5	-1690.57
5	Thorax	I1	55.9	26159.9	-1708.45
5	Thorax	I1	55.9	26164.5	-1704.31
5	Thorax	I1	55.9	26171.9	-1703.96
5	Thorax	I1	55.9	26135.3	-1704.59
5	Thorax	I1	55.9	26170.9	-1706.9
5	Thorax	I1	58.46	26130.1	-1718.36
5	Thorax	I1	58.46	26131.9	-1715.77
5	Thorax	I1	58.46	26095.1	-1721.75
5	Thorax	I1	58.46	26142.9	-1719.3
5	Thorax	I1	58.46	26107.1	-1716.14
5	Thorax	I1	61.03	26075.6	-1735.97
5	Thorax	I1	61.03	26068.2	-1736.12
5	Thorax	I1	61.03	26076.8	-1735.72
5	Thorax	I1	61.03	26097.5	-1728.82
5	Thorax	I1	61.03	26070.4	-1729.95
5	Thorax	I1	63.59	26022.7	-1751.9
5	Thorax	I1	63.59	26050.5	-1744
5	Thorax	I1	63.59	26046.8	-1745.55
5	Thorax	I1	63.59	26059.9	-1746.8
5	Thorax	I1	63.59	26048.2	-1753.26
5	Thorax	I1	66.15	26003.7	-1760.03
5	Thorax	I1	66.15	26006.7	-1758.71
5	Thorax	I1	66.15	26003.8	-1762.65
5	Thorax	I1	66.15	26018.9	-1760.82
5	Thorax	I1	66.15	25993.3	-1761.26
5	Thorax	I1	68.72	25972.1	-1775.75
5	Thorax	I1	68.72	25978.2	-1774.17
5	Thorax	I1	68.72	25999.6	-1778.98
5	Thorax	I1	68.72	25989.8	-1776.74
5	Thorax	I1	68.72	25978.9	-1784
5	Thorax	I1	71.28	25942.5	-1794
5	Thorax	I1	71.28	25936.4	-1791.95
5	Thorax	I1	71.28	25941.4	-1787.69
5	Thorax	I1	71.28	25936	-1789.9
5	Thorax	I1	71.28	25937.7	-1793.82
5	Thorax	I1	73.85	25907.9	-1808.09
5	Thorax	I1	73.85	25926.2	-1802.93
5	Thorax	I1	73.85	25910.2	-1810.71
5	Thorax	I1	73.85	25929.1	-1804.65
5	Thorax	I1	73.85	25925.1	-1803.11
5	Thorax	I1	76.41	25901.2	-1819.13
5	Thorax	I1	76.41	25885.7	-1823.36
5	Thorax	I1	76.41	25876.1	-1819.17
5	Thorax	I1	76.41	25894.1	-1825.94
5	Thorax	I1	76.41	25880.8	-1817.9
5	Thorax	I1	78.97	25845.1	-1833.02
5	Thorax	I1	78.97	25854.5	-1834.61
5	Thorax	I1	78.97	25848.7	-1842.97
5	Thorax	I1	78.97	25859.6	-1835.24
5	Thorax	I1	78.97	25848.6	-1837.17
5	Thorax	I1	81.54	25848.8	-1854.34
5	Thorax	I1	81.54	25808.5	-1857.76
5	Thorax	I1	81.54	25842.7	-1860.42
5	Thorax	I1	81.54	25849.2	-1853.05
5	Thorax	I1	81.54	25837.1	-1851.32
5	Thorax	I1	84.1	25818.5	-1868.6
5	Thorax	I1	84.1	25829.1	-1874.09
5	Thorax	I1	84.1	25810.5	-1872.45
5	Thorax	I1	84.1	25793.5	-1872.49
5	Thorax	I1	84.1	25790.1	-1872.93
5	Thorax	I1	86.67	25762.7	-1892.36
5	Thorax	I1	86.67	25769	-1892.56
5	Thorax	I1	86.67	25783.8	-1883.84
5	Thorax	I1	86.67	25760	-1886.3
5	Thorax	I1	86.67	25789	-1888.77
5	Thorax	I1	89.23	25745.7	-1903.75
5	Thorax	I1	89.23	25755.6	-1909.12
5	Thorax	I1	89.23	25730	-1901.72
5	Thorax	I1	89.23	25738.5	-1904.44
5	Thorax	I1	89.23	25739.7	-1904.35
5	Thorax	I1	91.79	25716.1	-1922.39
5	Thorax	I1	91.79	25743.5	-1926.49
5	Thorax	I1	91.79	25727.7	-1924.32
5	Thorax	I1	91.79	25724.4	-1921.04
5	Thorax	I1	91.79	25752.3	-1921.68
5	Thorax	I1	94.36	25714.7	-1938.96
5	Thorax	I1	94.36	25693.3	-1940.05
5	Thorax	I1	94.36	25720.8	-1937.02
5	Thorax	I1	94.36	25715.9	-1940.14
5	Thorax	I1	94.36	25729	-1941.44
5	Thorax	I1	96.92	25700.5	-1957.58
5	Thorax	I1	96.92	25670	-1958.29
5	Thorax	I1	96.92	25688.2	-1954.95
5	Thorax	I1	96.92	25686.9	-1962
5	Thorax	I1	96.92	25694.1	-1955.71
5	Thorax	I1	99.49	25660.2	-1975.15
5	Thorax	I1	99.49	25689.4	-1973.93
5	Thorax	I1	99.49	25655.9	-1978.81
5	Thorax	I1	99.49	25677.5	-1973.44
5	Thorax	I1	99.49	25672.4	-1974.28
5	Thorax	I1	102.05	25662.2	-1992.48
5	Thorax	I1	102.05	25637.7	-1993.6
5	Thorax	I1	102.05	25613.6	-1993.48
5	Thorax	I1	102.05	25643.6	-1997.16
5	Thorax	I1	102.05	25622.3	-2001.26
5	Thorax	I1	104.62	25631.8	-2014.21
5	Thorax	I1	104.62	25626.6	-2011.71
5	Thorax	I1	104.62	25638.3	-2010.03
5	Thorax	I1	104.62	25613.6	-2010.7
5	Thorax	I1	104.62	25628.6	-2014.26
5	Thorax	I1	107.18	25617.9	-2030.82
5	Thorax	I1	107.18	25599.5	-2028.16
5	Thorax	I1	107.18	25613.2	-2028.2
5	Thorax	I1	107.18	25610	-2025.74
5	Thorax	I1	107.18	25613.2	-2033.21
5	Thorax	I1	109.74	25575.5	-2051.01
5	Thorax	I1	109.74	25590.1	-2051.29
5	Thorax	I1	109.74	25605	-2050.22
5	Thorax	I1	109.74	25587.2	-2049.74
5	Thorax	I1	109.74	25588.4	-2052.63
5	Thorax	I1	112.31	25558.8	-2062.36
5	Thorax	I1	112.31	25557.5	-2065.06
5	Thorax	I1	112.31	25567.3	-2069.6
5	Thorax	I1	112.31	25566.5	-2072.32
5	Thorax	I1	112.31	25577.2	-2069.5
5	Thorax	I1	114.87	25540.4	-2086.58
5	Thorax	I1	114.87	25547.4	-2085.9
5	Thorax	I1	114.87	25530.4	-2086.52
5	Thorax	I1	114.87	25534.8	-2088.05
5	Thorax	I1	114.87	25535.8	-2091.71
5	Thorax	I1	117.44	25514.1	-2108.13
5	Thorax	I1	117.44	25521.9	-2104.57
5	Thorax	I1	117.44	25538.8	-2111.07
5	Thorax	I1	117.44	25545	-2105.71
5	Thorax	I1	117.44	25545.3	-2105.75
5	Thorax	I1	120	25502.6	-2125.1
5	Thorax	I1	120	25523.1	-2123.15
5	Thorax	I1	120	25500.1	-2127.53
5	Thorax	I1	120	25511.1	-2124.09
[truncated: 10,001 more rows]

## Sheet: Exp_4_IV
doc	I	V	row	I_case
augu_1_1	-0.183348	-845.404	3	f1
augu_1_1	-0.0824784	-827.223	4	f1
augu_1_1	-0.0139852	-809.078	5	f1
augu_1_1	0.0396909	-790.865	6	f1
augu_1_1	0.079803	-772.72	7	f1
augu_1_1	0.116454	-754.507	8	f1
augu_1_1	0.144086	-736.325	9	f1
augu_1_1	0.167635	-718.172	10	f1
augu_1_1	0.188827	-699.96	11	f1
augu_1_1	0.205436	-681.778	12	f1
augu_1_1	0.221963	-663.636	13	f1
augu_1_1	0.236928	-645.423	14	f1
augu_1_1	0.251557	-627.213	15	f1
augu_1_1	0.261631	-609.064	16	f1
augu_1_1	0.2726	-590.876	17	f1
augu_1_1	0.281817	-572.732	18	f1
augu_1_1	0.29202	-554.515	19	f1
augu_1_1	0.30105	-536.34	20	f1
augu_1_1	0.309805	-518.192	21	f1
augu_1_1	0.319595	-499.982	22	f1
augu_1_1	0.327401	-481.763	23	f1
augu_1_1	0.33314	-463.615	24	f1
augu_1_1	0.341247	-445.431	25	f1
augu_1_1	0.348903	-427.218	26	f1
augu_1_1	0.35586	-409.074	27	f1
augu_1_1	0.364032	-390.895	28	f1
augu_1_1	0.369914	-372.714	29	f1
augu_1_1	0.376495	-354.529	30	f1
augu_1_1	0.384486	-336.318	31	f1
augu_1_1	0.391993	-318.164	32	f1
augu_1_1	0.39892	-299.986	33	f1
augu_1_1	0.40593	-281.776	34	f1
augu_1_1	0.4122	-263.629	35	f1
augu_1_1	0.418682	-245.41	36	f1
augu_1_1	0.425417	-227.229	37	f1
augu_1_1	0.431577	-209.079	38	f1
augu_1_1	0.439136	-190.865	39	f1
augu_1_1	0.444557	-172.711	40	f1
augu_1_1	0.450998	-154.539	41	f1
augu_1_1	0.459299	-136.323	42	f1
augu_1_1	0.464759	-118.171	43	f1
augu_1_1	0.471521	-99.9576	44	f1
augu_1_1	0.477113	-81.7733	45	f1
augu_1_1	0.484526	-63.627	46	f1
augu_1_1	0.491944	-45.4117	47	f1
augu_1_1	0.496839	-27.2349	48	f1
augu_1_1	0.503506	-9.08388	49	f1
augu_1_1	0.463563	9.09849	50	f1
augu_1_1	0.511793	27.2448	51	f1
augu_1_1	0.522015	45.4546	52	f1
augu_1_1	0.530366	63.6332	53	f1
augu_1_1	0.53699	81.8059	54	f1
augu_1_1	0.54506	99.986	55	f1
augu_1_1	0.554426	118.199	56	f1
augu_1_1	0.559994	136.344	57	f1
augu_1_1	0.569357	154.556	58	f1
augu_1_1	0.576641	172.767	59	f1
augu_1_1	0.583082	190.908	60	f1
augu_1_1	0.591242	209.086	61	f1
augu_1_1	0.596444	227.265	62	f1
augu_1_1	0.600287	245.445	63	f1
augu_1_1	0.610755	263.658	64	f1
augu_1_1	0.614078	281.8	65	f1
augu_1_1	0.619419	300.009	66	f1
augu_1_1	0.623041	318.215	67	f1
augu_1_1	0.627834	336.364	68	f1
augu_1_1	0.630963	354.542	69	f1
augu_1_1	0.634333	372.752	70	f1
augu_1_1	0.63567	390.898	71	f1
augu_1_1	0.640963	409.107	72	f1
augu_1_1	0.642224	427.246	73	f1
augu_1_1	0.644732	445.452	74	f1
augu_1_1	0.646062	463.668	75	f1
augu_1_1	0.650573	481.812	76	f1
augu_1_1	0.652565	500.026	77	f1
augu_1_1	0.65403	518.204	78	f1
augu_1_1	0.655831	536.346	79	f1
augu_1_1	0.663325	554.552	80	f1
augu_1_1	0.667002	572.762	81	f1
augu_1_1	0.669364	590.905	82	f1
augu_1_1	0.676734	609.123	83	f1
augu_1_1	0.687346	627.267	84	f1
augu_1_1	0.69794	645.473	85	f1
augu_1_1	0.704629	663.648	86	f1
augu_1_1	0.715416	681.785	87	f1
augu_1_1	0.743373	699.996	88	f1
augu_1_1	0.761293	718.202	89	f1
augu_1_1	0.776721	736.356	90	f1
augu_1_1	0.802413	754.565	91	f1
augu_1_1	0.842134	772.744	92	f1
augu_1_1	0.366443	790.916	93	f1
augu_1_1	0.377523	809.097	94	f1
augu_1_1	0.704278	827.238	95	f1
augu_1_1	0.809356	845.448	96	f1
augu_1_1	-0.171977	845.44	102	f2
augu_1_1	-0.230117	827.23	103	f2
augu_1_1	-0.268873	809.09	104	f2
augu_1_1	-0.294799	790.912	105	f2
augu_1_1	-0.315039	772.738	106	f2
augu_1_1	-0.329841	754.56	107	f2
augu_1_1	-0.343118	736.351	108	f2
augu_1_1	-0.350068	718.201	109	f2
augu_1_1	-0.357737	699.992	110	f2
augu_1_1	-0.364043	681.781	111	f2
augu_1_1	-0.366975	663.643	112	f2
augu_1_1	-0.37166	645.469	113	f2
augu_1_1	-0.376162	627.263	114	f2
augu_1_1	-0.377282	609.119	115	f2
augu_1_1	-0.382356	590.9	116	f2
augu_1_1	-0.383172	572.759	117	f2
augu_1_1	-0.389025	554.548	118	f2
augu_1_1	-0.392494	536.342	119	f2
augu_1_1	-0.394568	518.201	120	f2
augu_1_1	-0.398244	500.023	121	f2
augu_1_1	-0.402268	481.808	122	f2
augu_1_1	-0.405797	463.664	123	f2
augu_1_1	-0.411205	445.449	124	f2
augu_1_1	-0.415834	427.241	125	f2
augu_1_1	-0.4197	409.102	126	f2
augu_1_1	-0.425909	390.893	127	f2
augu_1_1	-0.429522	372.748	128	f2
augu_1_1	-0.436228	354.536	129	f2
augu_1_1	-0.441301	336.359	130	f2
augu_1_1	-0.448292	318.21	131	f2
augu_1_1	-0.455471	300.005	132	f2
augu_1_1	-0.460519	281.795	133	f2
augu_1_1	-0.466045	263.653	134	f2
augu_1_1	-0.474756	245.439	135	f2
augu_1_1	-0.481889	227.26	136	f2
augu_1_1	-0.487171	209.081	137	f2
augu_1_1	-0.494892	190.905	138	f2
augu_1_1	-0.500645	172.763	139	f2
augu_1_1	-0.508859	154.552	140	f2
augu_1_1	-0.516656	136.34	141	f2
augu_1_1	-0.521867	118.195	142	f2
augu_1_1	-0.530175	99.9828	143	f2
augu_1_1	-0.53709	81.8024	144	f2
augu_1_1	-0.542744	63.6285	145	f2
augu_1_1	-0.549313	45.4501	146	f2
augu_1_1	-0.55618	27.2411	147	f2
augu_1_1	-0.560761	9.09451	148	f2
augu_1_1	-0.51819	-9.08842	149	f2
augu_1_1	-0.565222	-27.2403	150	f2
augu_1_1	-0.571503	-45.4167	151	f2
augu_1_1	-0.577427	-63.6324	152	f2
augu_1_1	-0.581949	-81.7777	153	f2
augu_1_1	-0.585931	-99.963	154	f2
augu_1_1	-0.590543	-118.175	155	f2
augu_1_1	-0.592747	-136.328	156	f2
augu_1_1	-0.597183	-154.543	157	f2
augu_1_1	-0.597664	-172.716	158	f2
augu_1_1	-0.598859	-190.87	159	f2
augu_1_1	-0.602517	-209.083	160	f2
augu_1_1	-0.604207	-227.234	161	f2
augu_1_1	-0.605088	-245.416	162	f2
augu_1_1	-0.606112	-263.634	163	f2
augu_1_1	-0.606045	-281.781	164	f2
augu_1_1	-0.609096	-299.991	165	f2
augu_1_1	-0.606085	-318.17	166	f2
augu_1_1	-0.606097	-336.322	167	f2
augu_1_1	-0.609205	-354.535	168	f2
augu_1_1	-0.608483	-372.719	169	f2
augu_1_1	-0.606614	-390.899	170	f2
augu_1_1	-0.606894	-409.078	171	f2
augu_1_1	-0.607229	-427.223	172	f2
augu_1_1	-0.610198	-445.437	173	f2
augu_1_1	-0.608877	-463.621	174	f2
augu_1_1	-0.607564	-481.768	175	f2
augu_1_1	-0.611182	-499.986	176	f2
augu_1_1	-0.612594	-518.197	177	f2
augu_1_1	-0.612136	-536.346	178	f2
augu_1_1	-0.615543	-554.52	179	f2
augu_1_1	-0.620141	-572.738	180	f2
augu_1_1	-0.623723	-590.881	181	f2
augu_1_1	-0.626952	-609.069	182	f2
augu_1_1	-0.632288	-627.219	183	f2
augu_1_1	-0.640857	-645.428	184	f2
augu_1_1	-0.647578	-663.641	185	f2
augu_1_1	-0.654436	-681.783	186	f2
augu_1_1	-0.667022	-699.965	187	f2
augu_1_1	-0.682169	-718.177	188	f2
augu_1_1	-0.698161	-736.33	189	f2
augu_1_1	-0.71115	-754.513	190	f2
augu_1_1	-0.731797	-772.722	191	f2
augu_1_1	-0.762399	-790.868	192	f2
augu_1_1	-0.79196	-809.083	193	f2
augu_1_1	-0.811657	-827.229	194	f2
augu_1_1	-0.850425	-845.41	195	f2
augu_1_1	0.0864394	-845.404	202	f1
augu_1_1	0.132454	-827.222	203	f1
augu_1_1	0.166696	-809.078	204	f1
augu_1_1	0.196258	-790.865	205	f1
augu_1_1	0.218052	-772.72	206	f1
augu_1_1	0.238281	-754.507	207	f1
augu_1_1	0.25303	-736.325	208	f1
augu_1_1	0.266752	-718.172	209	f1
augu_1_1	0.279649	-699.959	210	f1
augu_1_1	0.28871	-681.777	211	f1
augu_1_1	0.298286	-663.636	212	f1
augu_1_1	0.308248	-645.423	213	f1
augu_1_1	0.315181	-627.213	214	f1
augu_1_1	0.322093	-609.065	215	f1
augu_1_1	0.331097	-590.876	216	f1
augu_1_1	0.338103	-572.732	217	f1
augu_1_1	0.344429	-554.515	218	f1
augu_1_1	0.350091	-536.341	219	f1
augu_1_1	0.356046	-518.192	220	f1
augu_1_1	0.361581	-499.982	221	f1
augu_1_1	0.368356	-481.763	222	f1
augu_1_1	0.373625	-463.615	223	f1
augu_1_1	0.380691	-445.431	224	f1
augu_1_1	0.386097	-427.218	225	f1
augu_1_1	0.393098	-409.073	226	f1
augu_1_1	0.397287	-390.894	227	f1
augu_1_1	0.40526	-372.713	228	f1
augu_1_1	0.41195	-354.53	229	f1
augu_1_1	0.418226	-336.318	230	f1
augu_1_1	0.423234	-318.164	231	f1
augu_1_1	0.430329	-299.985	232	f1
augu_1_1	0.43556	-281.776	233	f1
augu_1_1	0.443484	-263.63	234	f1
augu_1_1	0.449104	-245.41	235	f1
augu_1_1	0.457501	-227.228	236	f1
augu_1_1	0.46315	-209.079	237	f1
augu_1_1	0.468964	-190.865	238	f1
augu_1_1	0.476406	-172.711	239	f1
augu_1_1	0.484427	-154.539	240	f1
augu_1_1	0.491916	-136.323	241	f1
augu_1_1	0.495453	-118.172	242	f1
augu_1_1	0.503514	-99.957	243	f1
augu_1_1	0.51216	-81.7733	244	f1
augu_1_1	0.518327	-63.6274	245	f1
augu_1_1	0.524838	-45.412	246	f1
augu_1_1	0.531802	-27.235	247	f1
augu_1_1	0.53988	-9.08388	248	f1
augu_1_1	0.499028	9.09863	249	f1
augu_1_1	0.549057	27.2447	250	f1
augu_1_1	0.558651	45.4544	251	f1
augu_1_1	0.565377	63.6326	252	f1
augu_1_1	0.573548	81.8061	253	f1
augu_1_1	0.581306	99.9873	254	f1
augu_1_1	0.587906	118.199	255	f1
augu_1_1	0.592119	136.344	256	f1
augu_1_1	0.601104	154.557	257	f1
augu_1_1	0.607856	172.767	258	f1
augu_1_1	0.610688	190.909	259	f1
augu_1_1	0.615189	209.085	260	f1
augu_1_1	0.62172	227.264	261	f1
augu_1_1	0.625476	245.445	262	f1
augu_1_1	0.629875	263.657	263	f1
augu_1_1	0.630054	281.8	264	f1
augu_1_1	0.636567	300.009	265	f1
augu_1_1	0.639505	318.214	266	f1
augu_1_1	0.639339	336.363	267	f1
augu_1_1	0.640293	354.54	268	f1
augu_1_1	0.644809	372.752	269	f1
augu_1_1	0.644634	390.898	270	f1
augu_1_1	0.645776	409.107	271	f1
augu_1_1	0.644183	427.245	272	f1
augu_1_1	0.649766	445.453	273	f1
augu_1_1	0.649737	463.668	274	f1
augu_1_1	0.650592	481.812	275	f1
augu_1_1	0.650176	500.027	276	f1
augu_1_1	0.654232	518.204	277	f1
augu_1_1	0.656348	536.346	278	f1
augu_1_1	0.657914	554.552	279	f1
augu_1_1	0.66021	572.762	280	f1
augu_1_1	0.66828	590.904	281	f1
augu_1_1	0.675384	609.123	282	f1
augu_1_1	0.678587	627.267	283	f1
augu_1_1	0.686326	645.473	284	f1
augu_1_1	0.701179	663.648	285	f1
augu_1_1	0.716108	681.785	286	f1
augu_1_1	0.72919	699.996	287	f1
augu_1_1	0.74267	718.202	288	f1
augu_1_1	0.773501	736.356	289	f1
augu_1_1	0.801639	754.565	290	f1
augu_1_1	0.824462	772.743	291	f1
augu_1_1	0.855123	790.916	292	f1
augu_1_1	0.377333	809.097	293	f1
augu_1_1	0.721651	827.238	294	f1
augu_1_1	0.815471	845.448	295	f1
augu_1_1	-0.120294	845.44	301	f2
augu_1_1	-0.18518	827.229	302	f2
augu_1_1	-0.228071	809.09	303	f2
augu_1_1	-0.259414	790.911	304	f2
augu_1_1	-0.2822	772.738	305	f2
augu_1_1	-0.299719	754.561	306	f2
augu_1_1	-0.312726	736.35	307	f2
augu_1_1	-0.322767	718.2	308	f2
augu_1_1	-0.33219	699.993	309	f2
augu_1_1	-0.339608	681.777	310	f2
augu_1_1	-0.343553	663.643	311	f2
augu_1_1	-0.349571	645.468	312	f2
augu_1_1	-0.354415	627.263	313	f2
augu_1_1	-0.357924	609.118	314	f2
augu_1_1	-0.362979	590.9	315	f2
augu_1_1	-0.365939	572.759	316	f2
augu_1_1	-0.371162	554.548	317	f2
augu_1_1	-0.374951	536.342	318	f2
augu_1_1	-0.378567	518.2	319	f2
augu_1_1	-0.382998	500.022	320	f2
augu_1_1	-0.388054	481.807	321	f2
augu_1_1	-0.391364	463.665	322	f2
augu_1_1	-0.397751	445.45	323	f2
augu_1_1	-0.402824	427.242	324	f2
augu_1_1	-0.406394	409.104	325	f2
augu_1_1	-0.41347	390.893	326	f2
augu_1_1	-0.418533	372.748	327	f2
augu_1_1	-0.42556	354.537	328	f2
augu_1_1	-0.43058	336.36	329	f2
augu_1_1	-0.437468	318.211	330	f2
augu_1_1	-0.445122	300.005	331	f2
augu_1_1	-0.451386	281.795	332	f2
augu_1_1	-0.457962	263.653	333	f2
augu_1_1	-0.46577	245.44	334	f2
augu_1_1	-0.472648	227.26	335	f2
augu_1_1	-0.479682	209.081	336	f2
augu_1_1	-0.486927	190.905	337	f2
augu_1_1	-0.494501	172.763	338	f2
augu_1_1	-0.50338	154.552	339	f2
augu_1_1	-0.51046	136.34	340	f2
augu_1_1	-0.516012	118.195	341	f2
augu_1_1	-0.524821	99.9829	342	f2
augu_1_1	-0.531709	81.8023	343	f2
augu_1_1	-0.537423	63.6285	344	f2
augu_1_1	-0.543757	45.45	345	f2
augu_1_1	-0.551523	27.2412	346	f2
augu_1_1	-0.557369	9.09424	347	f2
augu_1_1	-0.515229	-9.08925	348	f2
augu_1_1	-0.561548	-27.2405	349	f2
augu_1_1	-0.568281	-45.4176	350	f2
augu_1_1	-0.575337	-63.6321	351	f2
augu_1_1	-0.578986	-81.7776	352	f2
augu_1_1	-0.583687	-99.9623	353	f2
augu_1_1	-0.586634	-118.176	354	f2
augu_1_1	-0.589524	-136.329	355	f2
augu_1_1	-0.594242	-154.545	356	f2
augu_1_1	-0.596121	-172.717	357	f2
augu_1_1	-0.59608	-190.87	358	f2
augu_1_1	-0.599574	-209.084	359	f2
augu_1_1	-0.601491	-227.234	360	f2
augu_1_1	-0.602777	-245.416	361	f2
augu_1_1	-0.603669	-263.634	362	f2
augu_1_1	-0.603429	-281.781	363	f2
augu_1_1	-0.606216	-299.991	364	f2
augu_1_1	-0.604986	-318.17	365	f2
augu_1_1	-0.60423	-336.322	366	f2
augu_1_1	-0.606151	-354.536	367	f2
augu_1_1	-0.606651	-372.719	368	f2
augu_1_1	-0.605627	-390.9	369	f2
augu_1_1	-0.605142	-409.078	370	f2
augu_1_1	-0.604787	-427.224	371	f2
augu_1_1	-0.608233	-445.436	372	f2
augu_1_1	-0.606305	-463.621	373	f2
augu_1_1	-0.605904	-481.769	374	f2
augu_1_1	-0.608829	-499.987	375	f2
augu_1_1	-0.611604	-518.198	376	f2
augu_1_1	-0.610586	-536.346	377	f2
augu_1_1	-0.612803	-554.52	378	f2
augu_1_1	-0.617549	-572.738	379	f2
augu_1_1	-0.622156	-590.882	380	f2
augu_1_1	-0.623405	-609.07	381	f2
augu_1_1	-0.628394	-627.219	382	f2
augu_1_1	-0.637385	-645.428	383	f2
augu_1_1	-0.64731	-663.642	384	f2
augu_1_1	-0.652476	-681.783	385	f2
augu_1_1	-0.663774	-699.966	386	f2
augu_1_1	-0.67826	-718.177	387	f2
augu_1_1	-0.694877	-736.33	388	f2
augu_1_1	-0.708261	-754.512	389	f2
augu_1_1	-0.727739	-772.723	390	f2
augu_1_1	-0.755019	-790.867	391	f2
augu_1_1	-0.789214	-809.083	392	f2
augu_1_1	-0.810178	-827.23	393	f2
augu_1_1	-0.843474	-845.41	394	f2
augu_1_1	0.0889687	-845.404	401	f1
augu_1_1	0.133667	-827.223	402	f1
augu_1_1	0.167818	-809.078	403	f1
augu_1_1	0.197767	-790.865	404	f1
augu_1_1	0.218672	-772.72	405	f1
augu_1_1	0.239296	-754.507	406	f1
augu_1_1	0.253983	-736.325	407	f1
augu_1_1	0.267248	-718.172	408	f1
augu_1_1	0.279358	-699.96	409	f1
augu_1_1	0.289607	-681.778	410	f1
augu_1_1	0.29916	-663.636	411	f1
augu_1_1	0.309333	-645.423	412	f1
augu_1_1	0.317033	-627.213	413	f1
augu_1_1	0.323395	-609.064	414	f1
augu_1_1	0.331457	-590.877	415	f1
augu_1_1	0.337558	-572.733	416	f1
augu_1_1	0.343555	-554.515	417	f1
augu_1_1	0.351476	-536.341	418	f1
augu_1_1	0.35613	-518.192	419	f1
augu_1_1	0.363008	-499.983	420	f1
augu_1_1	0.369128	-481.763	421	f1
augu_1_1	0.374435	-463.616	422	f1
augu_1_1	0.38112	-445.432	423	f1
augu_1_1	0.388058	-427.219	424	f1
augu_1_1	0.392366	-409.074	425	f1
augu_1_1	0.399144	-390.895	426	f1
augu_1_1	0.404945	-372.714	427	f1
augu_1_1	0.411559	-354.531	428	f1
augu_1_1	0.418507	-336.319	429	f1
augu_1_1	0.423515	-318.164	430	f1
augu_1_1	0.431125	-299.987	431	f1
augu_1_1	0.43865	-281.776	432	f1
augu_1_1	0.443598	-263.629	433	f1
augu_1_1	0.451307	-245.411	434	f1
augu_1_1	0.458103	-227.229	435	f1
augu_1_1	0.464031	-209.079	436	f1
augu_1_1	0.47195	-190.866	437	f1
augu_1_1	0.47805	-172.712	438	f1
augu_1_1	0.484763	-154.54	439	f1
augu_1_1	0.492802	-136.324	440	f1
augu_1_1	0.498339	-118.172	441	f1
augu_1_1	0.50641	-99.9575	442	f1
augu_1_1	0.512898	-81.773	443	f1
augu_1_1	0.520028	-63.6282	444	f1
augu_1_1	0.528061	-45.4122	445	f1
augu_1_1	0.534307	-27.235	446	f1
augu_1_1	0.541409	-9.08402	447	f1
augu_1_1	0.500808	9.09904	448	f1
augu_1_1	0.551439	27.2453	449	f1
augu_1_1	0.561888	45.455	450	f1
augu_1_1	0.568952	63.6329	451	f1
augu_1_1	0.575552	81.8066	452	f1
augu_1_1	0.583524	99.9872	453	f1
augu_1_1	0.591626	118.2	454	f1
augu_1_1	0.595796	136.345	455	f1
augu_1_1	0.602136	154.557	456	f1
augu_1_1	0.609364	172.768	457	f1
augu_1_1	0.614256	190.909	458	f1
augu_1_1	0.618877	209.085	459	f1
augu_1_1	0.621695	227.264	460	f1
augu_1_1	0.627042	245.445	461	f1
augu_1_1	0.633393	263.658	462	f1
augu_1_1	0.633481	281.8	463	f1
augu_1_1	0.635826	300.009	464	f1
augu_1_1	0.640103	318.215	465	f1
augu_1_1	0.642369	336.364	466	f1
augu_1_1	0.642415	354.541	467	f1
augu_1_1	0.64403	372.752	468	f1
augu_1_1	0.64505	390.897	469	f1
augu_1_1	0.648626	409.107	470	f1
augu_1_1	0.646817	427.245	471	f1
augu_1_1	0.647049	445.453	472	f1
augu_1_1	0.649486	463.668	473	f1
augu_1_1	0.651335	481.811	474	f1
augu_1_1	0.652335	500.026	475	f1
augu_1_1	0.652036	518.205	476	f1
augu_1_1	0.654931	536.346	477	f1
augu_1_1	0.660411	554.552	478	f1
augu_1_1	0.66226	572.763	479	f1
augu_1_1	0.663491	590.904	480	f1
augu_1_1	0.672869	609.123	481	f1
augu_1_1	0.681084	627.267	482	f1
augu_1_1	0.687934	645.473	483	f1
augu_1_1	0.69481	663.648	484	f1
augu_1_1	0.707954	681.784	485	f1
augu_1_1	0.733088	699.996	486	f1
augu_1_1	0.748203	718.202	487	f1
augu_1_1	0.762796	736.355	488	f1
augu_1_1	0.792279	754.567	489	f1
augu_1_1	0.827192	772.743	490	f1
augu_1_1	0.855665	790.915	491	f1
augu_1_1	0.375896	809.098	492	f1
augu_1_1	0.719215	827.238	493	f1
augu_1_1	0.811544	845.449	494	f1
augu_1_1	-0.119056	845.44	500	f1
augu_1_1	-0.183699	827.23	501	f2
augu_1_1	-0.227089	809.091	502	f2
augu_1_1	-0.25832	790.912	503	f2
augu_1_1	-0.279858	772.739	504	f2
augu_1_1	-0.297177	754.561	505	f2
augu_1_1	-0.310841	736.351	506	f2
augu_1_1	-0.32073	718.2	507	f2
augu_1_1	-0.329586	699.993	508	f2
augu_1_1	-0.336652	681.78	509	f2
augu_1_1	-0.341881	663.644	510	f2
augu_1_1	-0.346743	645.469	511	f2
augu_1_1	-0.352752	627.263	512	f2
augu_1_1	-0.356193	609.119	513	f2
augu_1_1	-0.361651	590.901	514	f2
augu_1_1	-0.364727	572.758	515	f2
augu_1_1	-0.368846	554.548	516	f2
augu_1_1	-0.372752	536.343	517	f2
augu_1_1	-0.376559	518.201	518	f2
augu_1_1	-0.3812	500.023	519	f2
augu_1_1	-0.387061	481.808	520	f2
augu_1_1	-0.390194	463.665	521	f2
augu_1_1	-0.395061	445.449	522	f2
augu_1_1	-0.399912	427.242	523	f2
augu_1_1	-0.404869	409.103	524	f2
augu_1_1	-0.410799	390.894	525	f2
augu_1_1	-0.416932	372.748	526	f2
augu_1_1	-0.423254	354.538	527	f2
augu_1_1	-0.430024	336.36	528	f2
augu_1_1	-0.436342	318.211	529	f2
augu_1_1	-0.44318	300.004	530	f2
augu_1_1	-0.45116	281.795	531	f2
augu_1_1	-0.457187	263.653	532	f2
augu_1_1	-0.464665	245.44	533	f2
augu_1_1	-0.471722	227.26	534	f2
augu_1_1	-0.480181	209.08	535	f2
augu_1_1	-0.487333	190.904	536	f2
augu_1_1	-0.493209	172.763	537	f2
augu_1_1	-0.50141	154.552	538	f2
augu_1_1	-0.510537	136.34	539	f2
augu_1_1	-0.516905	118.195	540	f2
augu_1_1	-0.524003	99.9825	541	f2
augu_1_1	-0.531002	81.8019	542	f2
augu_1_1	-0.538473	63.6282	543	f2
augu_1_1	-0.545909	45.4502	544	f2
augu_1_1	-0.550939	27.2414	545	f2
augu_1_1	-0.555916	9.09507	546	f2
augu_1_1	-0.51579	-9.08856	547	f2
augu_1_1	-0.561746	-27.2401	548	f2
augu_1_1	-0.570034	-45.4175	549	f2
augu_1_1	-0.576234	-63.6323	550	f2
augu_1_1	-0.579627	-81.777	551	f2
augu_1_1	-0.586168	-99.9622	552	f2
augu_1_1	-0.592283	-118.176	553	f2
augu_1_1	-0.591108	-136.328	554	f2
augu_1_1	-0.594264	-154.545	555	f2
augu_1_1	-0.597805	-172.716	556	f2
augu_1_1	-0.600003	-190.87	557	f2
augu_1_1	-0.602594	-209.083	558	f2
augu_1_1	-0.602278	-227.234	559	f2
augu_1_1	-0.60337	-245.415	560	f2
augu_1_1	-0.605731	-263.634	561	f2
augu_1_1	-0.604848	-281.781	562	f2
augu_1_1	-0.605215	-299.991	563	f2
augu_1_1	-0.605957	-318.169	564	f2
augu_1_1	-0.606298	-336.322	565	f2
augu_1_1	-0.605951	-354.535	566	f2
augu_1_1	-0.604693	-372.719	567	f2
augu_1_1	-0.605563	-390.899	568	f2
augu_1_1	-0.606749	-409.079	569	f2
augu_1_1	-0.604419	-427.223	570	f2
augu_1_1	-0.604876	-445.436	571	f2
augu_1_1	-0.606098	-463.621	572	f2
augu_1_1	-0.606646	-481.768	573	f2
augu_1_1	-0.608596	-499.987	574	f2
augu_1_1	-0.609806	-518.197	575	f2
augu_1_1	-0.610997	-536.346	576	f2
augu_1_1	-0.613978	-554.52	577	f2
augu_1_1	-0.617142	-572.738	578	f2
augu_1_1	-0.618101	-590.881	579	f2
augu_1_1	-0.624036	-609.069	580	f2
augu_1_1	-0.63097	-627.218	581	f2
augu_1_1	-0.637107	-645.428	582	f2
augu_1_1	-0.643547	-663.641	583	f2
augu_1_1	-0.653198	-681.783	584	f2
augu_1_1	-0.66558	-699.965	585	f2
augu_1_1	-0.678145	-718.176	586	f2
augu_1_1	-0.690175	-736.33	587	f2
augu_1_1	-0.709352	-754.513	588	f2
augu_1_1	-0.7355	-772.722	589	f2
augu_1_1	-0.757221	-790.868	590	f2
augu_1_1	-0.776919	-809.083	591	f2
augu_1_1	-0.809959	-827.229	592	f2
augu_1_1	-0.853922	-845.411	593	f2
augu_1_2	-0.120328	-845.402	3	f1
augu_1_2	-0.000299403	-827.222	4	f1
augu_1_2	0.0805256	-809.076	5	f1
augu_1_2	0.141981	-790.863	6	f1
augu_1_2	0.188188	-772.718	7	f1
augu_1_2	0.227876	-754.505	8	f1
augu_1_2	0.257303	-736.322	9	f1
augu_1_2	0.283785	-718.169	10	f1
augu_1_2	0.305879	-699.958	11	f1
augu_1_2	0.324763	-681.776	12	f1
augu_1_2	0.340291	-663.635	13	f1
augu_1_2	0.357509	-645.421	14	f1
augu_1_2	0.370722	-627.212	15	f1
augu_1_2	0.382204	-609.062	16	f1
augu_1_2	0.394815	-590.874	17	f1
augu_1_2	0.405323	-572.731	18	f1
augu_1_2	0.416031	-554.513	19	f1
augu_1_2	0.424942	-536.34	20	f1
augu_1_2	0.433907	-518.19	21	f1
augu_1_2	0.443799	-499.98	22	f1
augu_1_2	0.451166	-481.761	23	f1
augu_1_2	0.45828	-463.614	24	f1
augu_1_2	0.466961	-445.429	25	f1
augu_1_2	0.476489	-427.217	26	f1
augu_1_2	0.482884	-409.071	27	f1
augu_1_2	0.490223	-390.893	28	f1
augu_1_2	0.497674	-372.711	29	f1
augu_1_2	0.505587	-354.529	30	f1
augu_1_2	0.513221	-336.316	31	f1
augu_1_2	0.518714	-318.162	32	f1
augu_1_2	0.526498	-299.984	33	f1
augu_1_2	0.536686	-281.774	34	f1
augu_1_2	0.541636	-263.628	35	f1
augu_1_2	0.549184	-245.409	36	f1
augu_1_2	0.555151	-227.226	37	f1
augu_1_2	0.563234	-209.077	38	f1
augu_1_2	0.571273	-190.863	39	f1
augu_1_2	0.575845	-172.709	40	f1
augu_1_2	0.583629	-154.538	41	f1
augu_1_2	0.592481	-136.321	42	f1
augu_1_2	0.597948	-118.17	43	f1
augu_1_2	0.604827	-99.9554	44	f1
augu_1_2	0.610735	-81.77	45	f1
augu_1_2	0.619652	-63.6248	46	f1
augu_1_2	0.627175	-45.4104	47	f1
augu_1_2	0.631056	-27.233	48	f1
augu_1_2	0.636282	-9.08178	49	f1
augu_1_2	0.581611	9.1012	50	f1
augu_1_2	0.645649	27.247	51	f1
augu_1_2	0.658819	45.4565	52	f1
augu_1_2	0.665962	63.6359	53	f1
augu_1_2	0.671662	81.8092	54	f1
augu_1_2	0.682722	99.9896	55	f1
augu_1_2	0.695476	118.202	56	f1
augu_1_2	0.697751	136.347	57	f1
augu_1_2	0.704646	154.559	58	f1
augu_1_2	0.714475	172.769	59	f1
augu_1_2	0.72879	190.91	60	f1
augu_1_2	0.734132	209.088	61	f1
augu_1_2	0.735381	227.267	62	f1
augu_1_2	0.745357	245.447	63	f1
augu_1_2	0.763013	263.659	64	f1
augu_1_2	0.763353	281.802	65	f1
augu_1_2	0.76492	300.011	66	f1
augu_1_2	0.772899	318.217	67	f1
augu_1_2	0.78523	336.365	68	f1
augu_1_2	0.786445	354.543	69	f1
augu_1_2	0.786779	372.753	70	f1
augu_1_2	0.790619	390.899	71	f1
augu_1_2	0.805553	409.108	72	f1
augu_1_2	0.803154	427.248	73	f1
augu_1_2	0.803345	445.456	74	f1
augu_1_2	0.810317	463.67	75	f1
augu_1_2	0.820541	481.813	76	f1
augu_1_2	0.822937	500.029	77	f1
augu_1_2	0.822494	518.206	78	f1
augu_1_2	0.830869	536.349	79	f1
augu_1_2	0.847333	554.555	80	f1
augu_1_2	0.852131	572.765	81	f1
augu_1_2	0.85303	590.907	82	f1
augu_1_2	0.871126	609.126	83	f1
augu_1_2	0.889688	627.27	84	f1
augu_1_2	0.900021	645.476	85	f1
augu_1_2	0.910736	663.651	86	f1
augu_1_2	0.390275	681.788	87	f1
augu_1_2	0.391908	700	88	f1
augu_1_2	0.741007	718.206	89	f1
augu_1_2	0.821614	736.356	90	f1
augu_1_2	0.885604	754.568	91	f1
augu_1_2	0.392751	772.746	92	f1
augu_1_2	0.809357	790.92	93	f1
augu_1_2	0.914094	809.098	94	f1
augu_1_2	0.998901	827.24	95	f1
augu_1_2	1.08339	845.451	96	f1
augu_1_2	-0.146137	845.444	102	f2
augu_1_2	-0.228696	827.233	103	f2
augu_1_2	-0.280981	809.095	104	f2
augu_1_2	-0.319062	790.915	105	f2
augu_1_2	-0.34718	772.741	106	f2
augu_1_2	-0.36605	754.563	107	f2
augu_1_2	-0.380191	736.353	108	f2
augu_1_2	-0.389858	718.202	109	f2
augu_1_2	-0.399951	699.996	110	f2
augu_1_2	-0.407428	681.783	111	f2
augu_1_2	-0.409687	663.647	112	f2
augu_1_2	-0.414627	645.472	113	f2
augu_1_2	-0.419732	627.266	114	f2
augu_1_2	-0.421664	609.122	115	f2
augu_1_2	-0.424965	590.903	116	f2
augu_1_2	-0.426401	572.762	117	f2
augu_1_2	-0.431391	554.55	118	f2
augu_1_2	-0.43459	536.345	119	f2
augu_1_2	-0.434096	518.203	120	f2
augu_1_2	-0.437222	500.026	121	f2
augu_1_2	-0.442772	481.81	122	f2
augu_1_2	-0.445163	463.667	123	f2
augu_1_2	-0.449021	445.451	124	f2
augu_1_2	-0.453845	427.244	125	f2
augu_1_2	-0.458362	409.106	126	f2
augu_1_2	-0.464294	390.896	127	f2
augu_1_2	-0.466307	372.75	128	f2
augu_1_2	-0.473797	354.54	129	f2
augu_1_2	-0.48022	336.362	130	f2
augu_1_2	-0.485498	318.214	131	f2
augu_1_2	-0.49087	300.007	132	f2
augu_1_2	-0.497345	281.798	133	f2
augu_1_2	-0.503449	263.655	134	f2
augu_1_2	-0.511488	245.442	135	f2
augu_1_2	-0.515998	227.263	136	f2
augu_1_2	-0.525263	209.084	137	f2
augu_1_2	-0.533726	190.907	138	f2
augu_1_2	-0.540148	172.765	139	f2
augu_1_2	-0.546697	154.555	140	f2
augu_1_2	-0.556625	136.343	141	f2
augu_1_2	-0.564249	118.197	142	f2
augu_1_2	-0.574081	99.9855	143	f2
augu_1_2	-0.577506	81.804	144	f2
augu_1_2	-0.585232	63.631	145	f2
augu_1_2	-0.594339	45.453	146	f2
augu_1_2	-0.604492	27.2439	147	f2
augu_1_2	-0.604323	9.09681	148	f2
augu_1_2	-0.549321	-9.08701	149	f2
augu_1_2	-0.612572	-27.2382	150	f2
augu_1_2	-0.623179	-45.4144	151	f2
augu_1_2	-0.63759	-63.6295	152	f2
augu_1_2	-0.636045	-81.7748	153	f2
augu_1_2	-0.63992	-99.9598	154	f2
augu_1_2	-0.650431	-118.173	155	f2
augu_1_2	-0.659708	-136.326	156	f2
augu_1_2	-0.659975	-154.542	157	f2
augu_1_2	-0.657784	-172.714	158	f2
augu_1_2	-0.666336	-190.868	159	f2
augu_1_2	-0.677703	-209.081	160	f2
augu_1_2	-0.671241	-227.231	161	f2
augu_1_2	-0.669268	-245.413	162	f2
augu_1_2	-0.677856	-263.632	163	f2
augu_1_2	-0.682871	-281.778	164	f2
augu_1_2	-0.67798	-299.989	165	f2
augu_1_2	-0.67405	-318.167	166	f2
augu_1_2	-0.679357	-336.32	167	f2
augu_1_2	-0.688396	-354.533	168	f2
augu_1_2	-0.680142	-372.716	169	f2
augu_1_2	-0.677332	-390.898	170	f2
augu_1_2	-0.683198	-409.076	171	f2
augu_1_2	-0.689234	-427.221	172	f2
augu_1_2	-0.683591	-445.434	173	f2
augu_1_2	-0.68024	-463.618	174	f2
augu_1_2	-0.686292	-481.765	175	f2
augu_1_2	-0.697149	-499.985	176	f2
augu_1_2	-0.690764	-518.195	177	f2
augu_1_2	-0.688689	-536.344	178	f2
augu_1_2	-0.698813	-554.518	179	f2
augu_1_2	-0.710331	-572.735	180	f2
augu_1_2	-0.706031	-590.879	181	f2
augu_1_2	-0.712579	-609.067	182	f2
augu_1_2	-0.724705	-627.216	183	f2
augu_1_2	-0.74213	-645.425	184	f2
augu_1_2	-0.745038	-663.639	185	f2
augu_1_2	-0.756215	-681.781	186	f2
augu_1_2	-0.780965	-699.962	187	f2
augu_1_2	-0.805605	-718.174	188	f2
augu_1_2	-0.813291	-736.327	189	f2
augu_1_2	-0.839869	-754.51	190	f2
augu_1_2	-0.332032	-772.723	191	f2
augu_1_2	-0.338452	-790.868	192	f2
augu_1_2	-0.694292	-809.081	193	f2
augu_1_2	-0.776954	-827.224	194	f2
augu_1_2	-0.336429	-845.408	195	f2
augu_1_2	0.215063	-845.402	202	f1
augu_1_2	0.266875	-827.221	203	f1
augu_1_2	0.304635	-809.076	204	f1
augu_1_2	0.335075	-790.863	205	f1
augu_1_2	0.357255	-772.719	206	f1
augu_1_2	0.378065	-754.505	207	f1
augu_1_2	0.392988	-736.323	208	f1
augu_1_2	0.407824	-718.17	209	f1
augu_1_2	0.421682	-699.958	210	f1
augu_1_2	0.430637	-681.776	211	f1
augu_1_2	0.439542	-663.634	212	f1
augu_1_2	0.450249	-645.42	213	f1
augu_1_2	0.458	-627.211	214	f1
augu_1_2	0.462017	-609.063	215	f1
augu_1_2	0.470763	-590.874	216	f1
augu_1_2	0.477045	-572.73	217	f1
augu_1_2	0.484455	-554.514	218	f1
augu_1_2	0.488895	-536.34	219	f1
augu_1_2	0.494699	-518.19	220	f1
augu_1_2	0.50312	-499.981	221	f1
augu_1_2	0.508509	-481.761	222	f1
augu_1_2	0.513029	-463.614	223	f1
augu_1_2	0.520126	-445.429	224	f1
augu_1_2	0.528023	-427.217	225	f1
augu_1_2	0.53185	-409.072	226	f1
augu_1_2	0.537729	-390.893	227	f1
augu_1_2	0.545086	-372.712	228	f1
augu_1_2	0.552689	-354.528	229	f1
augu_1_2	0.558268	-336.316	230	f1
augu_1_2	0.562814	-318.162	231	f1
augu_1_2	0.570859	-299.984	232	f1
augu_1_2	0.578798	-281.775	233	f1
augu_1_2	0.583113	-263.628	234	f1
augu_1_2	0.590459	-245.409	235	f1
augu_1_2	0.598417	-227.227	236	f1
augu_1_2	0.605571	-209.077	237	f1
augu_1_2	0.612825	-190.864	238	f1
augu_1_2	0.617185	-172.709	239	f1
augu_1_2	0.626408	-154.538	240	f1
augu_1_2	0.635524	-136.321	241	f1
augu_1_2	0.640506	-118.169	242	f1
augu_1_2	0.647531	-99.9557	243	f1
augu_1_2	0.65751	-81.7708	244	f1
augu_1_2	0.664708	-63.6256	245	f1
augu_1_2	0.671957	-45.4101	246	f1
augu_1_2	0.677708	-27.233	247	f1
augu_1_2	0.687433	-9.08178	248	f1
augu_1_2	0.627624	9.10093	249	f1
augu_1_2	0.698635	27.2484	250	f1
augu_1_2	0.710531	45.457	251	f1
augu_1_2	0.714403	63.6355	252	f1
augu_1_2	0.721857	81.8092	253	f1
augu_1_2	0.739022	99.9894	254	f1
augu_1_2	0.745894	118.202	255	f1
augu_1_2	0.74564	136.347	256	f1
augu_1_2	0.751165	154.56	257	f1
augu_1_2	0.76964	172.77	258	f1
augu_1_2	0.770983	190.912	259	f1
augu_1_2	0.772106	209.088	260	f1
augu_1_2	0.775353	227.267	261	f1
augu_1_2	0.790632	245.447	262	f1
augu_1_2	0.791975	263.66	263	f1
augu_1_2	0.78913	281.802	264	f1
augu_1_2	0.7943	300.011	265	f1
augu_1_2	0.806581	318.218	266	f1
augu_1_2	0.803262	336.366	267	f1
augu_1_2	0.800369	354.543	268	f1
augu_1_2	0.8043	372.754	269	f1
augu_1_2	0.813002	390.899	270	f1
augu_1_2	0.810825	409.109	271	f1
augu_1_2	0.804762	427.248	272	f1
augu_1_2	0.812824	445.456	273	f1
augu_1_2	0.822994	463.671	274	f1
augu_1_2	0.818743	481.813	275	f1
augu_1_2	0.817678	500.029	276	f1
augu_1_2	0.826922	518.206	277	f1
augu_1_2	0.834676	536.349	278	f1
augu_1_2	0.837364	554.554	279	f1
augu_1_2	0.838747	572.765	280	f1
augu_1_2	0.854645	590.906	281	f1
augu_1_2	0.868323	609.125	282	f1
augu_1_2	0.872131	627.27	283	f1
augu_1_2	0.884104	645.476	284	f1
augu_1_2	0.910737	663.651	285	f1
augu_1_2	0.928259	681.787	286	f1
augu_1_2	0.394855	700.001	287	f1
augu_1_2	0.397496	718.208	288	f1
augu_1_2	0.743091	736.357	289	f1
augu_1_2	0.846582	754.566	290	f1
augu_1_2	0.916965	772.745	291	f1
augu_1_2	0.403047	790.919	292	f1
augu_1_2	0.83391	809.097	293	f1
augu_1_2	0.94472	827.24	294	f1
augu_1_2	1.03882	845.451	295	f1
augu_1_2	-0.1568	845.443	301	f2
augu_1_2	-0.235867	827.234	302	f2
augu_1_2	-0.285698	809.094	303	f2
augu_1_2	-0.322661	790.916	304	f2
augu_1_2	-0.348581	772.74	305	f2
augu_1_2	-0.367756	754.563	306	f2
augu_1_2	-0.384681	736.354	307	f2
augu_1_2	-0.394343	718.203	308	f2
augu_1_2	-0.401816	699.996	309	f2
augu_1_2	-0.409963	681.783	310	f2
augu_1_2	-0.413841	663.647	311	f2
augu_1_2	-0.418874	645.471	312	f2
augu_1_2	-0.420711	627.265	313	f2
augu_1_2	-0.423099	609.121	314	f2
augu_1_2	-0.427082	590.902	315	f2
augu_1_2	-0.428655	572.76	316	f2
augu_1_2	-0.431659	554.551	317	f2
augu_1_2	-0.434912	536.345	318	f2
augu_1_2	-0.437069	518.203	319	f2
augu_1_2	-0.440485	500.024	320	f2
augu_1_2	-0.443801	481.81	321	f2
augu_1_2	-0.446341	463.668	322	f2
augu_1_2	-0.452023	445.452	323	f2
augu_1_2	-0.455698	427.244	324	f2
augu_1_2	-0.457705	409.106	325	f2
augu_1_2	-0.464269	390.896	326	f2
augu_1_2	-0.469328	372.751	327	f2
augu_1_2	-0.474408	354.54	328	f2
augu_1_2	-0.478297	336.362	329	f2
augu_1_2	-0.484646	318.214	330	f2
augu_1_2	-0.493355	300.008	331	f2
augu_1_2	-0.498084	281.798	332	f2
augu_1_2	-0.502133	263.656	333	f2
augu_1_2	-0.510764	245.443	334	f2
augu_1_2	-0.51896	227.263	335	f2
augu_1_2	-0.52375	209.083	336	f2
augu_1_2	-0.531752	190.908	337	f2
augu_1_2	-0.540167	172.765	338	f2
augu_1_2	-0.550557	154.555	339	f2
augu_1_2	-0.556029	136.343	340	f2
augu_1_2	-0.563331	118.198	341	f2
augu_1_2	-0.5736	99.986	342	f2
augu_1_2	-0.58379	81.8046	343	f2
augu_1_2	-0.586413	63.6317	344	f2
augu_1_2	-0.594867	45.4533	345	f2
augu_1_2	-0.604572	27.2436	346	f2
augu_1_2	-0.614901	9.09819	347	f2
augu_1_2	-0.551517	-9.08619	348	f2
augu_1_2	-0.620211	-27.2374	349	f2
augu_1_2	-0.623347	-45.4138	350	f2
augu_1_2	-0.633787	-63.6298	351	f2
augu_1_2	-0.644594	-81.7749	352	f2
augu_1_2	-0.649395	-99.9595	353	f2
augu_1_2	-0.64751	-118.173	354	f2
augu_1_2	-0.655579	-136.326	355	f2
augu_1_2	-0.667867	-154.542	356	f2
augu_1_2	-0.666589	-172.713	357	f2
augu_1_2	-0.663382	-190.868	358	f2
augu_1_2	-0.673548	-209.082	359	f2
augu_1_2	-0.67925	-227.231	360	f2
augu_1_2	-0.676336	-245.413	361	f2
augu_1_2	-0.675209	-263.631	362	f2
augu_1_2	-0.680148	-281.779	363	f2
augu_1_2	-0.688827	-299.989	364	f2
augu_1_2	-0.678741	-318.167	365	f2
augu_1_2	-0.676804	-336.32	366	f2
augu_1_2	-0.685157	-354.533	367	f2
augu_1_2	-0.690817	-372.716	368	f2
augu_1_2	-0.680683	-390.898	369	f2
augu_1_2	-0.681169	-409.076	370	f2
augu_1_2	-0.686212	-427.221	371	f2
augu_1_2	-0.693672	-445.434	372	f2
augu_1_2	-0.682683	-463.618	373	f2
augu_1_2	-0.683279	-481.765	374	f2
augu_1_2	-0.693721	-499.984	375	f2
augu_1_2	-0.699258	-518.194	376	f2
augu_1_2	-0.689512	-536.344	377	f2
augu_1_2	-0.697369	-554.518	378	f2
augu_1_2	-0.709195	-572.735	379	f2
augu_1_2	-0.713574	-590.878	380	f2
augu_1_2	-0.71224	-609.067	381	f2
augu_1_2	-0.723238	-627.216	382	f2
augu_1_2	-0.741966	-645.424	383	f2
augu_1_2	-0.751818	-663.638	384	f2
augu_1_2	-0.756246	-681.78	385	f2
augu_1_2	-0.77859	-699.961	386	f2
augu_1_2	-0.806849	-718.174	387	f2
augu_1_2	-0.819206	-736.327	388	f2
augu_1_2	-0.840179	-754.51	389	f2
augu_1_2	-0.333464	-772.722	390	f2
augu_1_2	-0.338969	-790.868	391	f2
augu_1_2	-0.69395	-809.08	392	f2
augu_1_2	-0.777117	-827.223	393	f2
augu_1_2	-0.33661	-845.407	394	f2
augu_1_2	0.214912	-845.402	401	f1
augu_1_2	0.267145	-827.221	402	f1
augu_1_2	0.304114	-809.075	403	f1
augu_1_2	0.336126	-790.862	404	f1
augu_1_2	0.357728	-772.718	405	f1
augu_1_2	0.377848	-754.505	406	f1
augu_1_2	0.394799	-736.322	407	f1
augu_1_2	0.407084	-718.169	408	f1
augu_1_2	0.420362	-699.957	409	f1
augu_1_2	0.429709	-681.775	410	f1
augu_1_2	0.438779	-663.634	411	f1
augu_1_2	0.448966	-645.421	412	f1
augu_1_2	0.456587	-627.211	413	f1
augu_1_2	0.462395	-609.062	414	f1
augu_1_2	0.471167	-590.874	415	f1
augu_1_2	0.475879	-572.73	416	f1
augu_1_2	0.483576	-554.513	417	f1
augu_1_2	0.489776	-536.339	418	f1
augu_1_2	0.497088	-518.19	419	f1
augu_1_2	0.504341	-499.979	420	f1
augu_1_2	0.509046	-481.761	421	f1
augu_1_2	0.513336	-463.614	422	f1
augu_1_2	0.521579	-445.429	423	f1
augu_1_2	0.527262	-427.216	424	f1
augu_1_2	0.5313	-409.071	425	f1
augu_1_2	0.53763	-390.892	426	f1
augu_1_2	0.546083	-372.711	427	f1
augu_1_2	0.551751	-354.527	428	f1
augu_1_2	0.558067	-336.315	429	f1
augu_1_2	0.563069	-318.163	430	f1
augu_1_2	0.571837	-299.984	431	f1
augu_1_2	0.578583	-281.774	432	f1
augu_1_2	0.582789	-263.627	433	f1
augu_1_2	0.591964	-245.408	434	f1
augu_1_2	0.600055	-227.227	435	f1
augu_1_2	0.605156	-209.077	436	f1
augu_1_2	0.612395	-190.863	437	f1
augu_1_2	0.620819	-172.709	438	f1
augu_1_2	0.628882	-154.537	439	f1
augu_1_2	0.635998	-136.321	440	f1
augu_1_2	0.640696	-118.169	441	f1
augu_1_2	0.652296	-99.9554	442	f1
augu_1_2	0.65934	-81.7708	443	f1
augu_1_2	0.664612	-63.6249	444	f1
augu_1_2	0.672407	-45.41	445	f1
augu_1_2	0.683019	-27.2325	446	f1
augu_1_2	0.692022	-9.08233	447	f1
augu_1_2	0.629995	9.10106	448	f1
augu_1_2	0.699789	27.2478	449	f1
augu_1_2	0.708744	45.4567	450	f1
augu_1_2	0.716419	63.6356	451	f1
augu_1_2	0.734013	81.8086	452	f1
augu_1_2	0.738922	99.9893	453	f1
augu_1_2	0.741699	118.202	454	f1
augu_1_2	0.746035	136.346	455	f1
augu_1_2	0.765532	154.559	456	f1
augu_1_2	0.768331	172.77	457	f1
augu_1_2	0.766375	190.911	458	f1
augu_1_2	0.774395	209.087	459	f1
augu_1_2	0.787279	227.266	460	f1
augu_1_2	0.787274	245.447	461	f1
augu_1_2	0.785812	263.66	462	f1
augu_1_2	0.792907	281.802	463	f1
augu_1_2	0.802501	300.011	464	f1
augu_1_2	0.800167	318.217	465	f1
augu_1_2	0.794878	336.366	466	f1
augu_1_2	0.806743	354.543	467	f1
augu_1_2	0.811796	372.754	468	f1
augu_1_2	0.806036	390.899	469	f1
augu_1_2	0.803872	409.109	470	f1
augu_1_2	0.814795	427.249	471	f1
augu_1_2	0.817376	445.456	472	f1
augu_1_2	0.813961	463.671	473	f1
augu_1_2	0.808905	481.814	474	f1
augu_1_2	0.827452	500.029	475	f1
augu_1_2	0.827563	518.206	476	f1
augu_1_2	0.825007	536.349	477	f1
augu_1_2	0.830057	554.555	478	f1
augu_1_2	0.850286	572.765	479	f1
augu_1_2	0.852259	590.906	480	f1
augu_1_2	0.85892	609.125	481	f1
augu_1_2	0.871102	627.269	482	f1
augu_1_2	0.895408	645.476	483	f1
augu_1_2	0.904779	663.651	484	f1
augu_1_2	0.917748	681.787	485	f1
augu_1_2	0.395096	700	486	f1
augu_1_2	0.397106	718.208	487	f1
augu_1_2	0.754172	736.356	488	f1
augu_1_2	0.841883	754.566	489	f1
augu_1_2	0.908366	772.746	490	f1
augu_1_2	0.402628	790.92	491	f1
augu_1_2	0.83339	809.099	492	f1
augu_1_2	0.943512	827.238	493	f1
augu_1_2	1.03755	845.451	494	f1
augu_1_2	-0.158538	845.444	500	f1
augu_1_2	-0.238174	827.235	501	f2
augu_1_2	-0.287262	809.094	502	f2
augu_1_2	-0.32403	790.916	503	f2
augu_1_2	-0.350229	772.741	504	f2
augu_1_2	-0.370189	754.564	505	f2
augu_1_2	-0.384387	736.354	506	f2
augu_1_2	-0.392993	718.203	507	f2
augu_1_2	-0.403281	699.996	508	f2
augu_1_2	-0.410413	681.784	509	f2
augu_1_2	-0.413112	663.646	510	f2
augu_1_2	-0.418206	645.472	511	f2
augu_1_2	-0.42278	627.266	512	f2
augu_1_2	-0.425406	609.122	513	f2
augu_1_2	-0.427091	590.904	514	f2
augu_1_2	-0.428253	572.762	515	f2
augu_1_2	-0.433779	554.552	516	f2
augu_1_2	-0.436355	536.346	517	f2
augu_1_2	-0.435848	518.204	518	f2
augu_1_2	-0.440405	500.026	519	f2
augu_1_2	-0.446325	481.809	520	f2
augu_1_2	-0.448417	463.668	521	f2
augu_1_2	-0.451687	445.452	522	f2
augu_1_2	-0.455935	427.245	523	f2
augu_1_2	-0.458974	409.106	524	f2
augu_1_2	-0.464208	390.896	525	f2
augu_1_2	-0.465585	372.751	526	f2
augu_1_2	-0.473275	354.54	527	f2
augu_1_2	-0.480674	336.362	528	f2
augu_1_2	-0.484247	318.214	529	f2
augu_1_2	-0.4909	300.008	530	f2
augu_1_2	-0.497396	281.799	531	f2
augu_1_2	-0.504838	263.657	532	f2
augu_1_2	-0.510798	245.444	533	f2
augu_1_2	-0.517384	227.264	534	f2
augu_1_2	-0.525644	209.083	535	f2
augu_1_2	-0.535157	190.908	536	f2
augu_1_2	-0.539229	172.765	537	f2
augu_1_2	-0.548699	154.556	538	f2
augu_1_2	-0.556953	136.343	539	f2
augu_1_2	-0.564819	118.198	540	f2
augu_1_2	-0.570084	99.9858	541	f2
augu_1_2	-0.578384	81.8048	542	f2
augu_1_2	-0.588237	63.6321	543	f2
augu_1_2	-0.59909	45.4535	544	f2
augu_1_2	-0.601515	27.2441	545	f2
augu_1_2	-0.608426	9.09791	546	f2
augu_1_2	-0.552399	-9.0866	547	f2
augu_1_2	-0.615684	-27.2378	548	f2
augu_1_2	-0.629287	-45.414	549	f2
augu_1_2	-0.639268	-63.6294	550	f2
augu_1_2	-0.635114	-81.7752	551	f2
augu_1_2	-0.644955	-99.9599	552	f2
augu_1_2	-0.658574	-118.174	553	f2
augu_1_2	-0.660273	-136.326	554	f2
augu_1_2	-0.659111	-154.542	555	f2
augu_1_2	-0.666144	-172.714	556	f2
augu_1_2	-0.675237	-190.868	557	f2
augu_1_2	-0.675904	-209.082	558	f2
augu_1_2	-0.669149	-227.232	559	f2
augu_1_2	-0.675782	-245.413	560	f2
augu_1_2	-0.686065	-263.632	561	f2
augu_1_2	-0.67947	-281.779	562	f2
augu_1_2	-0.678266	-299.989	563	f2
augu_1_2	-0.683184	-318.168	564	f2
augu_1_2	-0.689602	-336.32	565	f2
augu_1_2	-0.683496	-354.532	566	f2
augu_1_2	-0.680335	-372.717	567	f2
augu_1_2	-0.686576	-390.897	568	f2
augu_1_2	-0.692479	-409.077	569	f2
augu_1_2	-0.681741	-427.221	570	f2
augu_1_2	-0.682925	-445.435	571	f2
augu_1_2	-0.688784	-463.618	572	f2
augu_1_2	-0.693937	-481.766	573	f2
augu_1_2	-0.687102	-499.985	574	f2
augu_1_2	-0.691087	-518.196	575	f2
augu_1_2	-0.697208	-536.344	576	f2
augu_1_2	-0.7062	-554.518	577	f2
augu_1_2	-0.700364	-572.736	578	f2
augu_1_2	-0.706817	-590.879	579	f2
augu_1_2	-0.722014	-609.067	580	f2
augu_1_2	-0.730724	-627.216	581	f2
augu_1_2	-0.732246	-645.426	582	f2
augu_1_2	-0.749293	-663.639	583	f2
augu_1_2	-0.768432	-681.781	584	f2
augu_1_2	-0.782931	-699.963	585	f2
augu_1_2	-0.794303	-718.174	586	f2
augu_1_2	-0.820003	-736.328	587	f2
augu_1_2	-0.320873	-754.51	588	f2
augu_1_2	-0.326327	-772.724	589	f2
augu_1_2	-0.661108	-790.869	590	f2
augu_1_2	-0.741198	-809.082	591	f2
augu_1_2	-0.815629	-827.224	592	f2
augu_1_2	-0.344611	-845.407	593	f2
augu_1_3	-0.146892	-845.4	3	f1
augu_1_3	-0.0404005	-827.22	4	f1
augu_1_3	0.0307467	-809.075	5	f1
augu_1_3	0.0868457	-790.862	6	f1
augu_1_3	0.129264	-772.716	7	f1
augu_1_3	0.165876	-754.503	8	f1
augu_1_3	0.194434	-736.321	9	f1
augu_1_3	0.21855	-718.167	10	f1
augu_1_3	0.241095	-699.96	11	f1
augu_1_3	0.259595	-681.774	12	f1
augu_1_3	0.275357	-663.632	13	f1
augu_1_3	0.291673	-645.419	14	f1
augu_1_3	0.305189	-627.209	15	f1
augu_1_3	0.316452	-609.064	16	f1
augu_1_3	0.329215	-590.872	17	f1
augu_1_3	0.339632	-572.728	18	f1
augu_1_3	0.351264	-554.512	19	f1
augu_1_3	0.360415	-536.337	20	f1
augu_1_3	0.369667	-518.188	21	f1
augu_1_3	0.379515	-499.978	22	f1
augu_1_3	0.389576	-481.759	23	f1
augu_1_3	0.397431	-463.608	24	f1
augu_1_3	0.406264	-445.43	25	f1
augu_1_3	0.415519	-427.214	26	f1
augu_1_3	0.423078	-409.069	27	f1
augu_1_3	0.432219	-390.891	28	f1
augu_1_3	0.440056	-372.709	29	f1
augu_1_3	0.44891	-354.526	30	f1
augu_1_3	0.4582	-336.314	31	f1
augu_1_3	0.465145	-318.161	32	f1
augu_1_3	0.473191	-299.978	33	f1
augu_1_3	0.482198	-281.772	34	f1
augu_1_3	0.490345	-263.625	35	f1
augu_1_3	0.499637	-245.406	36	f1
augu_1_3	0.507102	-227.224	37	f1
augu_1_3	0.514374	-209.074	38	f1
augu_1_3	0.525198	-190.861	39	f1
augu_1_3	0.531531	-172.707	40	f1
augu_1_3	0.539386	-154.535	41	f1
augu_1_3	0.548028	-136.318	42	f1
augu_1_3	0.557376	-118.167	43	f1
augu_1_3	0.565405	-99.9528	44	f1
augu_1_3	0.571681	-81.768	45	f1
augu_1_3	0.578664	-63.6233	46	f1
augu_1_3	0.590211	-45.4073	47	f1
augu_1_3	0.596715	-27.2301	48	f1
augu_1_3	0.602297	-9.07961	49	f1
augu_1_3	0.553711	9.10259	50	f1
augu_1_3	0.61213	27.2497	51	f1
augu_1_3	0.625271	45.4591	52	f1
augu_1_3	0.634817	63.6378	53	f1
augu_1_3	0.641549	81.8118	54	f1
augu_1_3	0.648581	99.9893	55	f1
augu_1_3	0.660134	118.201	56	f1
augu_1_3	0.669121	136.349	57	f1
augu_1_3	0.67596	154.561	58	f1
augu_1_3	0.681585	172.772	59	f1
augu_1_3	0.689954	190.914	60	f1
augu_1_3	0.704549	209.09	61	f1
augu_1_3	0.707235	227.269	62	f1
augu_1_3	0.70845	245.449	63	f1
augu_1_3	0.71867	263.659	64	f1
augu_1_3	0.730451	281.801	65	f1
augu_1_3	0.732995	300.013	66	f1
augu_1_3	0.73194	318.219	67	f1
augu_1_3	0.738276	336.368	68	f1
augu_1_3	0.749855	354.545	69	f1
augu_1_3	0.750808	372.756	70	f1
augu_1_3	0.746205	390.901	71	f1
augu_1_3	0.755037	409.111	72	f1
augu_1_3	0.762828	427.249	73	f1
augu_1_3	0.761892	445.455	74	f1
augu_1_3	0.75981	463.673	75	f1
augu_1_3	0.766347	481.816	76	f1
augu_1_3	0.776232	500.031	77	f1
augu_1_3	0.774001	518.208	78	f1
augu_1_3	0.771077	536.351	79	f1
augu_1_3	0.784395	554.557	80	f1
augu_1_3	0.794998	572.767	81	f1
augu_1_3	0.795298	590.906	82	f1
augu_1_3	0.799548	609.125	83	f1
augu_1_3	0.815383	627.27	84	f1
augu_1_3	0.832633	645.476	85	f1
augu_1_3	0.840748	663.651	86	f1
augu_1_3	0.850719	681.789	87	f1
augu_1_3	0.882812	700.001	88	f1
augu_1_3	0.388598	718.207	89	f1
augu_1_3	0.390446	736.36	90	f1
augu_1_3	0.709379	754.571	91	f1
augu_1_3	0.7921	772.748	92	f1
augu_1_3	0.870656	790.921	93	f1
augu_1_3	0.398447	809.101	94	f1
augu_1_3	0.791329	827.241	95	f1
augu_1_3	0.90161	845.451	96	f1
augu_1_3	-0.125679	845.445	102	f2
augu_1_3	-0.198464	827.236	103	f2
augu_1_3	-0.246646	809.091	104	f2
augu_1_3	-0.282012	790.916	105	f2
augu_1_3	-0.308264	772.741	106	f2
augu_1_3	-0.327624	754.564	107	f2
augu_1_3	-0.34484	736.354	108	f2
augu_1_3	-0.354729	718.203	109	f2
augu_1_3	-0.365898	699.998	110	f2
augu_1_3	-0.374125	681.784	111	f2
augu_1_3	-0.380139	663.652	112	f2
augu_1_3	-0.38511	645.467	113	f2
augu_1_3	-0.390805	627.267	114	f2
augu_1_3	-0.394459	609.122	115	f2
augu_1_3	-0.401126	590.904	116	f2
augu_1_3	-0.401775	572.758	117	f2
augu_1_3	-0.407733	554.553	118	f2
augu_1_3	-0.411944	536.347	119	f2
augu_1_3	-0.415499	518.205	120	f2
augu_1_3	-0.41913	500.026	121	f2
augu_1_3	-0.423738	481.81	122	f2
augu_1_3	-0.427704	463.668	123	f2
augu_1_3	-0.434606	445.455	124	f2
augu_1_3	-0.437521	427.246	125	f2
augu_1_3	-0.441293	409.105	126	f2
augu_1_3	-0.448467	390.903	127	f2
augu_1_3	-0.453592	372.751	128	f2
augu_1_3	-0.458735	354.54	129	f2
augu_1_3	-0.464618	336.362	130	f2
augu_1_3	-0.471261	318.214	131	f2
augu_1_3	-0.47968	300.008	132	f2
augu_1_3	-0.484402	281.798	133	f2
augu_1_3	-0.490373	263.658	134	f2
augu_1_3	-0.499677	245.444	135	f2
augu_1_3	-0.507889	227.264	136	f2
augu_1_3	-0.51238	209.083	137	f2
augu_1_3	-0.520418	190.908	138	f2
augu_1_3	-0.528539	172.766	139	f2
augu_1_3	-0.538845	154.555	140	f2
augu_1_3	-0.54388	136.344	141	f2
augu_1_3	-0.550723	118.198	142	f2
augu_1_3	-0.561227	99.9851	143	f2
augu_1_3	-0.569312	81.8004	144	f2
augu_1_3	-0.573214	63.6291	145	f2
augu_1_3	-0.581149	45.4536	146	f2
augu_1_3	-0.589768	27.2448	147	f2
augu_1_3	-0.597787	9.09766	148	f2
augu_1_3	-0.543025	-9.08552	149	f2
augu_1_3	-0.603932	-27.2342	150	f2
augu_1_3	-0.607695	-45.4108	151	f2
augu_1_3	-0.616116	-63.6285	152	f2
augu_1_3	-0.623604	-81.7746	153	f2
augu_1_3	-0.63312	-99.959	154	f2
augu_1_3	-0.629904	-118.173	155	f2
augu_1_3	-0.634283	-136.325	156	f2
augu_1_3	-0.644774	-154.542	157	f2
augu_1_3	-0.649473	-172.71	158	f2
augu_1_3	-0.641898	-190.864	159	f2
augu_1_3	-0.648176	-209.08	160	f2
augu_1_3	-0.653679	-227.23	161	f2
augu_1_3	-0.657814	-245.412	162	f2
augu_1_3	-0.649576	-263.631	163	f2
augu_1_3	-0.651921	-281.778	164	f2
augu_1_3	-0.659119	-299.989	165	f2
augu_1_3	-0.659559	-318.163	166	f2
augu_1_3	-0.648398	-336.317	167	f2
augu_1_3	-0.652652	-354.532	168	f2
augu_1_3	-0.656861	-372.716	169	f2
augu_1_3	-0.656645	-390.897	170	f2
augu_1_3	-0.645868	-409.076	171	f2
augu_1_3	-0.64711	-427.221	172	f2
augu_1_3	-0.653234	-445.434	173	f2
augu_1_3	-0.652878	-463.619	174	f2
augu_1_3	-0.641919	-481.763	175	f2
augu_1_3	-0.646077	-499.982	176	f2
augu_1_3	-0.651714	-518.195	177	f2
augu_1_3	-0.651565	-536.344	178	f2
augu_1_3	-0.643514	-554.518	179	f2
augu_1_3	-0.649075	-572.736	180	f2
augu_1_3	-0.65614	-590.879	181	f2
augu_1_3	-0.661117	-609.067	182	f2
augu_1_3	-0.654477	-627.217	183	f2
augu_1_3	-0.666152	-645.421	184	f2
augu_1_3	-0.679957	-663.636	185	f2
augu_1_3	-0.686911	-681.78	186	f2
augu_1_3	-0.688628	-699.962	187	f2
augu_1_3	-0.707068	-718.175	188	f2
augu_1_3	-0.727996	-736.324	189	f2
augu_1_3	-0.744668	-754.51	190	f2
augu_1_3	-0.75713	-772.723	191	f2
augu_1_3	-0.784831	-790.868	192	f2
augu_1_3	-0.82112	-809.081	193	f2
augu_1_3	-0.350147	-827.226	194	f2
augu_1_3	-0.672596	-845.407	195	f2
augu_1_3	0.133704	-845.405	202	f1
augu_1_3	0.181664	-827.219	203	f1
augu_1_3	0.217962	-809.074	204	f1
augu_1_3	0.248123	-790.866	205	f1
augu_1_3	0.270544	-772.717	206	f1
augu_1_3	0.290995	-754.504	207	f1
augu_1_3	0.306889	-736.321	208	f1
augu_1_3	0.32096	-718.167	209	f1
augu_1_3	0.33419	-699.956	210	f1
augu_1_3	0.344975	-681.77	211	f1
augu_1_3	0.353999	-663.628	212	f1
augu_1_3	0.364737	-645.418	213	f1
augu_1_3	0.373608	-627.209	214	f1
augu_1_3	0.380311	-609.063	215	f1
augu_1_3	0.388533	-590.872	216	f1
augu_1_3	0.396094	-572.728	217	f1
augu_1_3	0.404355	-554.511	218	f1
augu_1_3	0.41062	-536.337	219	f1
augu_1_3	0.417149	-518.188	220	f1
augu_1_3	0.426144	-499.977	221	f1
augu_1_3	0.433291	-481.759	222	f1
augu_1_3	0.43851	-463.612	223	f1
augu_1_3	0.445685	-445.426	224	f1
augu_1_3	0.454569	-427.214	225	f1
augu_1_3	0.460221	-409.07	226	f1
augu_1_3	0.467362	-390.89	227	f1
augu_1_3	0.474613	-372.709	228	f1
augu_1_3	0.483121	-354.523	229	f1
augu_1_3	0.490925	-336.312	230	f1
augu_1_3	0.496311	-318.16	231	f1
augu_1_3	0.504689	-299.987	232	f1
augu_1_3	0.514853	-281.771	233	f1
augu_1_3	0.521398	-263.618	234	f1
augu_1_3	0.530037	-245.406	235	f1
augu_1_3	0.536747	-227.224	236	f1
augu_1_3	0.546495	-209.075	237	f1
augu_1_3	0.555946	-190.861	238	f1
augu_1_3	0.561656	-172.707	239	f1
augu_1_3	0.570724	-154.537	240	f1
augu_1_3	0.582107	-136.319	241	f1
augu_1_3	0.589387	-118.166	242	f1
augu_1_3	0.598489	-99.9531	243	f1
augu_1_3	0.605813	-81.7678	244	f1
augu_1_3	0.616853	-63.6227	245	f1
augu_1_3	0.626527	-45.4072	246	f1
augu_1_3	0.632986	-27.242	247	f1
augu_1_3	0.640148	-9.08002	248	f1
augu_1_3	0.590869	9.10287	249	f1
augu_1_3	0.651776	27.2491	250	f1
augu_1_3	0.667645	45.4585	251	f1
augu_1_3	0.674432	63.6377	252	f1
augu_1_3	0.68048	81.81	253	f1
augu_1_3	0.687997	99.9912	254	f1
augu_1_3	0.703931	118.205	255	f1
augu_1_3	0.707173	136.345	256	f1
augu_1_3	0.710573	154.558	257	f1
augu_1_3	0.715832	172.771	258	f1
augu_1_3	0.730182	190.914	259	f1
augu_1_3	0.733537	209.087	260	f1
augu_1_3	0.733599	227.269	261	f1
augu_1_3	0.734472	245.449	262	f1
augu_1_3	0.750995	263.662	263	f1
augu_1_3	0.749814	281.797	264	f1
augu_1_3	0.749268	300.014	265	f1
augu_1_3	0.7484	318.217	266	f1
augu_1_3	0.760687	336.365	267	f1
augu_1_3	0.760301	354.545	268	f1
augu_1_3	0.757558	372.762	269	f1
augu_1_3	0.752909	390.901	270	f1
augu_1_3	0.767893	409.113	271	f1
augu_1_3	0.764168	427.252	272	f1
augu_1_3	0.761721	445.459	273	f1
augu_1_3	0.759182	463.672	274	f1
augu_1_3	0.771248	481.82	275	f1
augu_1_3	0.771764	500.032	276	f1
augu_1_3	0.76831	518.209	277	f1
augu_1_3	0.765848	536.35	278	f1
augu_1_3	0.784181	554.557	279	f1
augu_1_3	0.786438	572.768	280	f1
augu_1_3	0.785362	590.909	281	f1
augu_1_3	0.791135	609.128	282	f1
augu_1_3	0.811536	627.269	283	f1
augu_1_3	0.821158	645.476	284	f1
augu_1_3	0.828119	663.652	285	f1
augu_1_3	0.841072	681.787	286	f1
augu_1_3	0.874286	700.002	287	f1
augu_1_3	0.891498	718.21	288	f1
augu_1_3	0.393364	736.369	289	f1
augu_1_3	0.397903	754.57	290	f1
augu_1_3	0.720453	772.749	291	f1
augu_1_3	0.825137	790.922	292	f1
augu_1_3	0.38404	809.102	293	f1
augu_1_3	0.775306	827.242	294	f1
augu_1_3	0.885195	845.452	295	f1
augu_1_3	-0.130758	845.443	301	f2
augu_1_3	-0.20294	827.234	302	f2
augu_1_3	-0.248978	809.094	303	f2
augu_1_3	-0.284462	790.915	304	f2
augu_1_3	-0.309921	772.736	305	f2
augu_1_3	-0.329578	754.565	306	f2
augu_1_3	-0.345907	736.355	307	f2
augu_1_3	-0.355691	718.198	308	f2
augu_1_3	-0.366314	699.995	309	f2
augu_1_3	-0.375006	681.784	310	f2
augu_1_3	-0.380539	663.638	311	f2
augu_1_3	-0.385692	645.473	312	f2
augu_1_3	-0.391292	627.258	313	f2
augu_1_3	-0.394907	609.123	314	f2
augu_1_3	-0.401287	590.904	315	f2
augu_1_3	-0.402399	572.762	316	f2
augu_1_3	-0.407454	554.544	317	f2
augu_1_3	-0.412168	536.347	318	f2
augu_1_3	-0.415591	518.204	319	f2
augu_1_3	-0.418294	500.026	320	f2
augu_1_3	-0.42356	481.812	321	f2
augu_1_3	-0.427459	463.668	322	f2
augu_1_3	-0.433759	445.453	323	f2
augu_1_3	-0.43648	427.245	324	f2
augu_1_3	-0.440592	409.107	325	f2
augu_1_3	-0.448051	390.896	326	f2
augu_1_3	-0.452899	372.751	327	f2
augu_1_3	-0.457953	354.54	328	f2
augu_1_3	-0.464276	336.362	329	f2
augu_1_3	-0.470322	318.217	330	f2
augu_1_3	-0.478763	300.009	331	f2
augu_1_3	-0.483512	281.799	332	f2
augu_1_3	-0.48978	263.659	333	f2
augu_1_3	-0.499451	245.445	334	f2
augu_1_3	-0.506902	227.264	335	f2
augu_1_3	-0.51221	209.084	336	f2
augu_1_3	-0.520116	190.909	337	f2
augu_1_3	-0.528518	172.766	338	f2
augu_1_3	-0.538663	154.556	339	f2
augu_1_3	-0.543823	136.343	340	f2
augu_1_3	-0.550909	118.198	341	f2
augu_1_3	-0.561874	99.9863	342	f2
augu_1_3	-0.569799	81.8048	343	f2
augu_1_3	-0.573557	63.6315	344	f2
augu_1_3	-0.582291	45.4534	345	f2
augu_1_3	-0.591859	27.2438	346	f2
augu_1_3	-0.600275	9.09793	347	f2
augu_1_3	-0.545564	-9.0858	348	f2
augu_1_3	-0.605258	-27.2343	349	f2
augu_1_3	-0.610704	-45.4109	350	f2
augu_1_3	-0.619599	-63.6288	351	f2
augu_1_3	-0.628702	-81.7776	352	f2
augu_1_3	-0.635124	-99.9566	353	f2
augu_1_3	-0.63395	-118.173	354	f2
augu_1_3	-0.638994	-136.325	355	f2
augu_1_3	-0.650738	-154.542	356	f2
augu_1_3	-0.651818	-172.713	357	f2
augu_1_3	-0.646341	-190.859	358	f2
augu_1_3	-0.653628	-209.077	359	f2
augu_1_3	-0.660075	-227.231	360	f2
augu_1_3	-0.660597	-245.412	361	f2
augu_1_3	-0.654259	-263.631	362	f2
augu_1_3	-0.657248	-281.778	363	f2
augu_1_3	-0.665383	-299.992	364	f2
augu_1_3	-0.661577	-318.167	365	f2
augu_1_3	-0.652759	-336.317	366	f2
augu_1_3	-0.658099	-354.529	367	f2
augu_1_3	-0.662707	-372.715	368	f2
augu_1_3	-0.658324	-390.897	369	f2
augu_1_3	-0.650661	-409.075	370	f2
augu_1_3	-0.652451	-427.221	371	f2
augu_1_3	-0.659765	-445.433	372	f2
augu_1_3	-0.65349	-463.619	373	f2
augu_1_3	-0.645898	-481.765	374	f2
augu_1_3	-0.651011	-499.982	375	f2
augu_1_3	-0.657299	-518.192	376	f2
augu_1_3	-0.650966	-536.343	377	f2
augu_1_3	-0.647457	-554.517	378	f2
augu_1_3	-0.654409	-572.735	379	f2
augu_1_3	-0.66099	-590.879	380	f2
augu_1_3	-0.659949	-609.067	381	f2
augu_1_3	-0.658335	-627.216	382	f2
augu_1_3	-0.670832	-645.425	383	f2
augu_1_3	-0.684702	-663.636	384	f2
augu_1_3	-0.685392	-681.778	385	f2
augu_1_3	-0.692193	-699.962	386	f2
augu_1_3	-0.711979	-718.174	387	f2
augu_1_3	-0.732026	-736.328	388	f2
augu_1_3	-0.741503	-754.51	389	f2
augu_1_3	-0.76058	-772.72	390	f2
augu_1_3	-0.789328	-790.868	391	f2
augu_1_3	-0.822	-809.081	392	f2
augu_1_3	-0.351744	-827.226	393	f2
augu_1_3	-0.672644	-845.407	394	f2
augu_1_3	0.131922	-845.4	401	f1
augu_1_3	0.180596	-827.22	402	f1
augu_1_3	0.216875	-809.074	403	f1
augu_1_3	0.246975	-790.861	404	f1
augu_1_3	0.269105	-772.717	405	f1
augu_1_3	0.289992	-754.504	406	f1
augu_1_3	0.30598	-736.321	407	f1
augu_1_3	0.319547	-718.168	408	f1
augu_1_3	0.333278	-699.956	409	f1
augu_1_3	0.343682	-681.774	410	f1
augu_1_3	0.353048	-663.633	411	f1
augu_1_3	0.364084	-645.419	412	f1
augu_1_3	0.372393	-627.209	413	f1
augu_1_3	0.379876	-609.062	414	f1
augu_1_3	0.388304	-590.873	415	f1
augu_1_3	0.395465	-572.73	416	f1
augu_1_3	0.40334	-554.512	417	f1
augu_1_3	0.409403	-536.338	418	f1
augu_1_3	0.41687	-518.189	419	f1
augu_1_3	0.42504	-499.978	420	f1
augu_1_3	0.432003	-481.76	421	f1
augu_1_3	0.437732	-463.612	422	f1
augu_1_3	0.445893	-445.428	423	f1
augu_1_3	0.453933	-427.215	424	f1
augu_1_3	0.45953	-409.07	425	f1
augu_1_3	0.466643	-390.891	426	f1
augu_1_3	0.474822	-372.71	427	f1
augu_1_3	0.482831	-354.527	428	f1
augu_1_3	0.490205	-336.314	429	f1
augu_1_3	0.496312	-318.161	430	f1
augu_1_3	0.505536	-299.983	431	f1
augu_1_3	0.514426	-281.773	432	f1
augu_1_3	0.520393	-263.626	433	f1
augu_1_3	0.529196	-245.407	434	f1
augu_1_3	0.538486	-227.225	435	f1
augu_1_3	0.546437	-209.075	436	f1
augu_1_3	0.555666	-190.861	437	f1
augu_1_3	0.561709	-172.706	438	f1
augu_1_3	0.572822	-154.536	439	f1
augu_1_3	0.583243	-136.319	440	f1
augu_1_3	0.590192	-118.168	441	f1
augu_1_3	0.599317	-99.9531	442	f1
augu_1_3	0.609847	-81.7687	443	f1
augu_1_3	0.618745	-63.6228	444	f1
augu_1_3	0.627854	-45.4082	445	f1
augu_1_3	0.634438	-27.2348	446	f1
augu_1_3	0.645477	-9.08332	447	f1
augu_1_3	0.593441	9.10232	448	f1
augu_1_3	0.657562	27.2494	449	f1
augu_1_3	0.668844	45.459	450	f1
augu_1_3	0.675853	63.6377	451	f1
augu_1_3	0.682942	81.811	452	f1
augu_1_3	0.697054	99.9918	453	f1
augu_1_3	0.705449	118.201	454	f1
augu_1_3	0.705498	136.345	455	f1
augu_1_3	0.712198	154.56	456	f1
augu_1_3	0.728002	172.771	457	f1
augu_1_3	0.730727	190.913	458	f1
augu_1_3	0.731172	209.089	459	f1
augu_1_3	0.732083	227.269	460	f1
augu_1_3	0.748086	245.447	461	f1
augu_1_3	0.750591	263.659	462	f1
augu_1_3	0.746313	281.804	463	f1
augu_1_3	0.747323	300.013	464	f1
augu_1_3	0.76158	318.219	465	f1
augu_1_3	0.758634	336.368	466	f1
augu_1_3	0.75583	354.544	467	f1
augu_1_3	0.754612	372.756	468	f1
augu_1_3	0.766114	390.902	469	f1
augu_1_3	0.764793	409.109	470	f1
augu_1_3	0.758698	427.247	471	f1
augu_1_3	0.759225	445.458	472	f1
augu_1_3	0.772162	463.673	473	f1
augu_1_3	0.767173	481.816	474	f1
augu_1_3	0.765209	500.031	475	f1
augu_1_3	0.765358	518.208	476	f1
augu_1_3	0.777804	536.351	477	f1
augu_1_3	0.779239	554.556	478	f1
augu_1_3	0.779394	572.767	479	f1
augu_1_3	0.783794	590.906	480	f1
augu_1_3	0.802669	609.126	481	f1
augu_1_3	0.80569	627.271	482	f1
augu_1_3	0.81258	645.477	483	f1
augu_1_3	0.828579	663.652	484	f1
augu_1_3	0.851526	681.789	485	f1
augu_1_3	0.866696	699.999	486	f1
augu_1_3	0.883011	718.209	487	f1
augu_1_3	0.392838	736.359	488	f1
augu_1_3	0.39717	754.571	489	f1
augu_1_3	0.730091	772.748	490	f1
augu_1_3	0.819579	790.922	491	f1
augu_1_3	0.889696	809.101	492	f1
augu_1_3	0.410043	827.242	493	f1
augu_1_3	0.818079	845.452	494	f1
augu_1_3	-0.135977	845.444	500	f1
augu_1_3	-0.206596	827.234	501	f2
augu_1_3	-0.253068	809.094	502	f2
augu_1_3	-0.287319	790.915	503	f2
augu_1_3	-0.311797	772.741	504	f2
augu_1_3	-0.331088	754.564	505	f2
augu_1_3	-0.346528	736.354	506	f2
augu_1_3	-0.357294	718.203	507	f2
augu_1_3	-0.368586	699.996	508	f2
augu_1_3	-0.375529	681.786	509	f2
augu_1_3	-0.380688	663.647	510	f2
augu_1_3	-0.387032	645.472	511	f2
augu_1_3	-0.393081	627.269	512	f2
augu_1_3	-0.395407	609.122	513	f2
augu_1_3	-0.400838	590.904	514	f2
augu_1_3	-0.403991	572.763	515	f2
augu_1_3	-0.409559	554.552	516	f2
augu_1_3	-0.412036	536.346	517	f2
augu_1_3	-0.414886	518.204	518	f2
augu_1_3	-0.419721	500.026	519	f2
augu_1_3	-0.425435	481.811	520	f2
augu_1_3	-0.42698	463.668	521	f2
augu_1_3	-0.432715	445.453	522	f2
augu_1_3	-0.438058	427.246	523	f2
augu_1_3	-0.442264	409.107	524	f2
augu_1_3	-0.447073	390.897	525	f2
augu_1_3	-0.451843	372.751	526	f2
augu_1_3	-0.459246	354.539	527	f2
augu_1_3	-0.465289	336.362	528	f2
augu_1_3	-0.469131	318.215	529	f2
augu_1_3	-0.477256	300.009	530	f2
augu_1_3	-0.484888	281.801	531	f2
augu_1_3	-0.491623	263.655	532	f2
augu_1_3	-0.49758	245.444	533	f2
augu_1_3	-0.505297	227.264	534	f2
augu_1_3	-0.513933	209.084	535	f2
augu_1_3	-0.522155	190.908	536	f2
augu_1_3	-0.527118	172.764	537	f2
augu_1_3	-0.537019	154.557	538	f2
augu_1_3	-0.54642	136.344	539	f2
augu_1_3	-0.553643	118.198	540	f2
augu_1_3	-0.560279	99.9833	541	f2
augu_1_3	-0.56802	81.8059	542	f2
augu_1_3	-0.577072	63.6315	543	f2
augu_1_3	-0.585994	45.4533	544	f2
augu_1_3	-0.59089	27.2441	545	f2
augu_1_3	-0.597172	9.09834	546	f2
augu_1_3	-0.546749	-9.08566	547	f2
augu_1_3	-0.605034	-27.2336	548	f2
augu_1_3	-0.618176	-45.4101	549	f2
augu_1_3	-0.6236	-63.6281	550	f2
augu_1_3	-0.625119	-81.7743	551	f2
augu_1_3	-0.632988	-99.9589	552	f2
augu_1_3	-0.645457	-118.173	553	f2
augu_1_3	-0.64377	-136.326	554	f2
augu_1_3	-0.644819	-154.541	555	f2
augu_1_3	-0.650905	-172.709	556	f2
augu_1_3	-0.659713	-190.864	557	f2
augu_1_3	-0.657345	-209.081	558	f2
augu_1_3	-0.653805	-227.229	559	f2
augu_1_3	-0.660614	-245.412	560	f2
augu_1_3	-0.668955	-263.631	561	f2
augu_1_3	-0.660771	-281.779	562	f2
augu_1_3	-0.658515	-299.989	563	f2
augu_1_3	-0.662761	-318.161	564	f2
augu_1_3	-0.667721	-336.315	565	f2
augu_1_3	-0.660305	-354.532	566	f2
augu_1_3	-0.656045	-372.715	567	f2
augu_1_3	-0.659554	-390.896	568	f2
augu_1_3	-0.664183	-409.076	569	f2
augu_1_3	-0.653498	-427.221	570	f2
augu_1_3	-0.652011	-445.434	571	f2
augu_1_3	-0.655679	-463.614	572	f2
augu_1_3	-0.659213	-481.762	573	f2
augu_1_3	-0.651093	-499.986	574	f2
augu_1_3	-0.649934	-518.194	575	f2
augu_1_3	-0.653879	-536.343	576	f2
augu_1_3	-0.660583	-554.518	577	f2
augu_1_3	-0.653764	-572.735	578	f2
augu_1_3	-0.653693	-590.878	579	f2
augu_1_3	-0.662506	-609.063	580	f2
augu_1_3	-0.671556	-627.212	581	f2
augu_1_3	-0.668874	-645.425	582	f2
augu_1_3	-0.67605	-663.634	583	f2
augu_1_3	-0.688669	-681.78	584	f2
augu_1_3	-0.705121	-699.963	585	f2
augu_1_3	-0.70801	-718.171	586	f2
augu_1_3	-0.72233	-736.324	587	f2
augu_1_3	-0.748075	-754.509	588	f2
augu_1_3	-0.771133	-772.727	589	f2
augu_1_3	-0.781212	-790.868	590	f2
augu_1_3	-0.814457	-809.076	591	f2
augu_1_3	-0.352106	-827.227	592	f2
augu_1_3	-0.672943	-845.407	593	f2
augu_2_1	-0.18741	-845.4	3	f1
augu_2_1	-0.0793228	-827.219	4	f1
augu_2_1	-0.00845775	-809.074	5	f1
augu_2_1	0.0465424	-790.86	6	f1
augu_2_1	0.0875253	-772.716	7	f1
augu_2_1	0.122256	-754.502	8	f1
augu_2_1	0.151299	-736.32	9	f1
augu_2_1	0.174844	-718.167	10	f1
augu_2_1	0.196041	-699.955	11	f1
augu_2_1	0.21317	-681.773	12	f1
augu_2_1	0.229433	-663.632	13	f1
augu_2_1	0.245807	-645.418	14	f1
augu_2_1	0.259711	-627.209	15	f1
augu_2_1	0.271336	-609.06	16	f1
augu_2_1	0.2841	-590.871	17	f1
augu_2_1	0.294559	-572.727	18	f1
augu_2_1	0.305952	-554.51	19	f1
augu_2_1	0.315813	-536.338	20	f1
augu_2_1	0.326054	-518.187	21	f1
augu_2_1	0.336904	-499.976	22	f1
augu_2_1	0.34618	-481.759	23	f1
augu_2_1	0.354013	-463.611	24	f1
augu_2_1	0.364362	-445.425	25	f1
augu_2_1	0.374586	-427.213	26	f1
augu_2_1	0.381348	-409.069	27	f1
augu_2_1	0.390601	-390.889	28	f1
augu_2_1	0.400572	-372.708	29	f1
augu_2_1	0.409287	-354.524	30	f1
augu_2_1	0.418855	-336.311	31	f1
augu_2_1	0.426214	-318.16	32	f1
augu_2_1	0.436041	-299.98	33	f1
augu_2_1	0.446302	-281.77	34	f1
augu_2_1	0.452058	-263.625	35	f1
augu_2_1	0.462994	-245.405	36	f1
augu_2_1	0.471782	-227.223	37	f1
augu_2_1	0.479708	-209.074	38	f1
augu_2_1	0.488623	-190.859	39	f1
augu_2_1	0.496296	-172.706	40	f1
augu_2_1	0.506622	-154.536	41	f1
augu_2_1	0.515605	-136.319	42	f1
augu_2_1	0.521918	-118.167	43	f1
augu_2_1	0.53246	-99.9518	44	f1
augu_2_1	0.539897	-81.7676	45	f1
augu_2_1	0.547576	-63.6234	46	f1
augu_2_1	0.556516	-45.4083	47	f1
augu_2_1	0.564547	-27.2304	48	f1
augu_2_1	0.572861	-9.07933	49	f1
augu_2_1	0.516442	9.10479	50	f1
augu_2_1	0.58374	27.2523	51	f1
augu_2_1	0.59534	45.4587	52	f1
augu_2_1	0.60354	63.6337	53	f1
augu_2_1	0.614956	81.8108	54	f1
augu_2_1	0.625492	99.9917	55	f1
augu_2_1	0.634609	118.122	56	f1
augu_2_1	0.639711	136.296	57	f1
augu_2_1	0.654744	154.527	58	f1
augu_2_1	0.666339	172.746	59	f1
augu_2_1	0.671308	190.707	60	f1
augu_2_1	0.677985	208.896	61	f1
augu_2_1	0.689885	227.122	62	f1
augu_2_1	0.700351	245.337	63	f1
augu_2_1	0.705749	263.311	64	f1
augu_2_1	0.707229	281.513	65	f1
augu_2_1	0.719467	299.78	66	f1
augu_2_1	0.725338	318.063	67	f1
augu_2_1	0.725976	335.975	68	f1
augu_2_1	0.727979	354.234	69	f1
augu_2_1	0.73702	372.504	70	f1
augu_2_1	0.739556	390.744	71	f1
augu_2_1	0.740246	408.732	72	f1
augu_2_1	0.738147	426.975	73	f1
augu_2_1	0.747019	445.252	74	f1
augu_2_1	0.750585	463.548	75	f1
augu_2_1	0.746458	481.491	76	f1
augu_2_1	0.748161	499.789	77	f1
augu_2_1	0.754976	518.036	78	f1
augu_2_1	0.757168	536.26	79	f1
augu_2_1	0.757923	554.273	80	f1
augu_2_1	0.761366	572.562	81	f1
augu_2_1	0.769212	590.755	82	f1
augu_2_1	0.778071	609.048	83	f1
augu_2_1	0.7794	626.977	84	f1
augu_2_1	0.790504	645.24	85	f1
augu_2_1	0.805124	663.456	86	f1
augu_2_1	0.817298	681.65	87	f1
augu_2_1	0.830315	699.562	88	f1
augu_2_1	0.85093	717.806	89	f1
augu_2_1	0.335572	735.945	90	f1
augu_2_1	0.337781	754.107	91	f1
augu_2_1	0.675787	772.748	92	f1
augu_2_1	0.760942	790.922	93	f1
augu_2_1	0.833791	809.087	94	f1
augu_2_1	0.345241	827.012	95	f1
augu_2_1	0.757216	844.92	96	f1
augu_2_1	-0.206621	845.448	102	f2
augu_2_1	-0.273023	827.238	103	f2
augu_2_1	-0.315465	809.098	104	f2
augu_2_1	-0.347627	790.919	105	f2
augu_2_1	-0.371081	772.746	106	f2
augu_2_1	-0.387557	754.569	107	f2
augu_2_1	-0.403017	736.36	108	f2
augu_2_1	-0.413165	718.209	109	f2
augu_2_1	-0.423603	700	110	f2
augu_2_1	-0.432405	681.787	111	f2
augu_2_1	-0.436715	663.651	112	f2
augu_2_1	-0.444063	645.476	113	f2
augu_2_1	-0.450029	627.271	114	f2
augu_2_1	-0.453828	609.127	115	f2
augu_2_1	-0.460852	590.907	116	f2
augu_2_1	-0.464342	572.766	117	f2
augu_2_1	-0.470629	554.554	118	f2
augu_2_1	-0.476165	536.349	119	f2
augu_2_1	-0.480377	518.207	120	f2
augu_2_1	-0.486714	500.029	121	f2
augu_2_1	-0.493259	481.815	122	f2
augu_2_1	-0.497824	463.672	123	f2
augu_2_1	-0.505457	445.456	124	f2
augu_2_1	-0.512614	427.249	125	f2
augu_2_1	-0.517488	409.109	126	f2
augu_2_1	-0.525476	390.899	127	f2
augu_2_1	-0.531617	372.754	128	f2
augu_2_1	-0.541384	354.543	129	f2
augu_2_1	-0.548367	336.366	130	f2
augu_2_1	-0.556006	318.214	131	f2
augu_2_1	-0.565737	300.012	132	f2
augu_2_1	-0.576547	281.803	133	f2
augu_2_1	-0.582712	263.66	134	f2
augu_2_1	-0.592902	245.434	135	f2
augu_2_1	-0.601783	227.269	136	f2
augu_2_1	-0.61237	209.089	137	f2
augu_2_1	-0.620522	190.912	138	f2
augu_2_1	-0.628755	172.794	139	f2
augu_2_1	-0.63959	154.585	140	f2
augu_2_1	-0.650308	136.364	141	f2
augu_2_1	-0.656077	118.215	142	f2
augu_2_1	-0.665788	100.075	143	f2
augu_2_1	-0.674048	81.8845	144	f2
augu_2_1	-0.684628	63.7046	145	f2
augu_2_1	-0.691529	45.5178	146	f2
augu_2_1	-0.697274	27.4229	147	f2
augu_2_1	-0.704588	9.24134	148	f2
augu_2_1	-0.643996	-8.9344	149	f2
augu_2_1	-0.712032	-27.0803	150	f2
augu_2_1	-0.726394	-45.2612	151	f2
augu_2_1	-0.729816	-63.4425	152	f2
augu_2_1	-0.732957	-81.4533	153	f2
augu_2_1	-0.742227	-99.6895	154	f2
augu_2_1	-0.750315	-117.925	155	f2
augu_2_1	-0.748471	-135.97	156	f2
augu_2_1	-0.752675	-154.079	157	f2
augu_2_1	-0.757295	-172.339	158	f2
augu_2_1	-0.761563	-190.532	159	f2
augu_2_1	-0.761071	-209.077	160	f2
augu_2_1	-0.759126	-227.226	161	f2
augu_2_1	-0.764125	-245.38	162	f2
augu_2_1	-0.768249	-263.569	163	f2
augu_2_1	-0.761669	-281.7	164	f2
augu_2_1	-0.761899	-299.822	165	f2
augu_2_1	-0.764365	-317.976	166	f2
augu_2_1	-0.76444	-336.153	167	f2
augu_2_1	-0.760597	-354.383	168	f2
augu_2_1	-0.758284	-372.711	169	f2
augu_2_1	-0.760764	-390.891	170	f2
augu_2_1	-0.761698	-409.071	171	f2
augu_2_1	-0.754937	-427.197	172	f2
augu_2_1	-0.754961	-445.403	173	f2
augu_2_1	-0.757313	-463.512	174	f2
augu_2_1	-0.756846	-481.672	175	f2
augu_2_1	-0.754044	-499.901	176	f2
augu_2_1	-0.753609	-518.118	177	f2
augu_2_1	-0.756573	-536.339	178	f2
augu_2_1	-0.759321	-554.513	179	f2
augu_2_1	-0.75769	-572.733	180	f2
augu_2_1	-0.758766	-590.875	181	f2
augu_2_1	-0.76769	-609.062	182	f2
augu_2_1	-0.771369	-627.141	183	f2
augu_2_1	-0.775189	-645.357	184	f2
augu_2_1	-0.782533	-663.578	185	f2
augu_2_1	-0.794499	-681.722	186	f2
augu_2_1	-0.805154	-699.806	187	f2
augu_2_1	-0.815151	-718.039	188	f2
augu_2_1	-0.829263	-736.193	189	f2
augu_2_1	-0.852693	-754.39	190	f2
augu_2_1	-0.871659	-772.402	191	f2
augu_2_1	-0.890238	-790.563	192	f2
augu_2_1	-0.408588	-808.74	193	f2
augu_2_1	-0.415781	-826.739	194	f2
augu_2_1	-0.748432	-844.572	195	f2
augu_2_1	0.149968	-845.4	202	f1
augu_2_1	0.189609	-827.219	203	f1
augu_2_1	0.219148	-809.074	204	f1
augu_2_1	0.244332	-790.86	205	f1
augu_2_1	0.262362	-772.715	206	f1
augu_2_1	0.279713	-754.503	207	f1
augu_2_1	0.293411	-736.32	208	f1
augu_2_1	0.3047	-718.167	209	f1
augu_2_1	0.316048	-699.955	210	f1
augu_2_1	0.32513	-681.773	211	f1
augu_2_1	0.33412	-663.631	212	f1
augu_2_1	0.343307	-645.418	213	f1
augu_2_1	0.3503	-627.209	214	f1
augu_2_1	0.356898	-609.06	215	f1
augu_2_1	0.365156	-590.871	216	f1
augu_2_1	0.371453	-572.727	217	f1
augu_2_1	0.379359	-554.511	218	f1
augu_2_1	0.385507	-536.337	219	f1
augu_2_1	0.391713	-518.187	220	f1
augu_2_1	0.399626	-499.977	221	f1
augu_2_1	0.406354	-481.758	222	f1
augu_2_1	0.412464	-463.611	223	f1
augu_2_1	0.42021	-445.426	224	f1
augu_2_1	0.427855	-427.213	225	f1
augu_2_1	0.43324	-409.069	226	f1
augu_2_1	0.441842	-390.889	227	f1
augu_2_1	0.449676	-372.708	228	f1
augu_2_1	0.456998	-354.525	229	f1
augu_2_1	0.464411	-336.313	230	f1
augu_2_1	0.472235	-318.16	231	f1
augu_2_1	0.481219	-299.981	232	f1
augu_2_1	0.489747	-281.771	233	f1
augu_2_1	0.496163	-263.624	234	f1
augu_2_1	0.50532	-245.405	235	f1
augu_2_1	0.514488	-227.224	236	f1
augu_2_1	0.522742	-209.074	237	f1
augu_2_1	0.532219	-190.861	238	f1
augu_2_1	0.54021	-172.706	239	f1
augu_2_1	0.550665	-154.535	240	f1
augu_2_1	0.56104	-136.318	241	f1
augu_2_1	0.567781	-118.168	242	f1
augu_2_1	0.579222	-99.9541	243	f1
augu_2_1	0.588674	-81.7681	244	f1
augu_2_1	0.597262	-63.6235	245	f1
augu_2_1	0.606952	-45.3812	246	f1
augu_2_1	0.615382	-27.2991	247	f1
augu_2_1	0.626072	-9.10433	248	f1
augu_2_1	0.566935	9.07622	249	f1
augu_2_1	0.63863	27.2094	250	f1
augu_2_1	0.653227	45.4197	251	f1
augu_2_1	0.659168	63.4378	252	f1
augu_2_1	0.671888	81.5828	253	f1
augu_2_1	0.683702	99.8189	254	f1
augu_2_1	0.693299	118.055	255	f1
augu_2_1	0.695702	135.976	256	f1
augu_2_1	0.70794	154.217	257	f1
augu_2_1	0.717341	172.491	258	f1
augu_2_1	0.721019	190.713	259	f1
augu_2_1	0.724517	208.6	260	f1
augu_2_1	0.733158	226.855	261	f1
augu_2_1	0.74029	245.121	262	f1
augu_2_1	0.744186	263.444	263	f1
augu_2_1	0.741819	281.292	264	f1
augu_2_1	0.749561	299.613	265	f1
augu_2_1	0.754978	317.912	266	f1
augu_2_1	0.753401	336.178	267	f1
augu_2_1	0.750997	354.081	268	f1
augu_2_1	0.756798	372.429	269	f1
augu_2_1	0.757866	390.664	270	f1
augu_2_1	0.759161	408.979	271	f1
augu_2_1	0.753266	426.898	272	f1
augu_2_1	0.75845	445.231	273	f1
augu_2_1	0.761503	463.527	274	f1
augu_2_1	0.757847	481.751	275	f1
augu_2_1	0.755799	499.759	276	f1
augu_2_1	0.76017	518.058	277	f1
augu_2_1	0.762701	536.269	278	f1
augu_2_1	0.764704	554.528	279	f1
augu_2_1	0.76372	572.564	280	f1
augu_2_1	0.769537	590.796	281	f1
augu_2_1	0.779008	609.063	282	f1
augu_2_1	0.782422	627.226	283	f1
augu_2_1	0.788895	645.27	284	f1
augu_2_1	0.803517	663.514	285	f1
augu_2_1	0.816534	681.679	286	f1
augu_2_1	0.831117	699.797	287	f1
augu_2_1	0.845982	717.869	288	f1
augu_2_1	0.335851	736.062	289	f1
augu_2_1	0.337315	754.243	290	f1
augu_2_1	0.671274	772.13	291	f1
augu_2_1	0.759236	790.118	292	f1
augu_2_1	0.825849	808.238	293	f1
augu_2_1	0.343126	826.241	294	f1
augu_2_1	0.75381	845.452	295	f1
augu_2_1	-0.205101	845.45	301	f2
augu_2_1	-0.271151	827.238	302	f2
augu_2_1	-0.313155	809.098	303	f2
augu_2_1	-0.345006	790.919	304	f2
augu_2_1	-0.368058	772.745	305	f2
augu_2_1	-0.385569	754.568	306	f2
augu_2_1	-0.400409	736.358	307	f2
augu_2_1	-0.41047	718.207	308	f2
augu_2_1	-0.421352	700	309	f2
augu_2_1	-0.429216	681.787	310	f2
augu_2_1	-0.434546	663.651	311	f2
augu_2_1	-0.441453	645.474	312	f2
augu_2_1	-0.44858	627.27	313	f2
augu_2_1	-0.451762	609.127	314	f2
augu_2_1	-0.458248	590.908	315	f2
augu_2_1	-0.462026	572.767	316	f2
augu_2_1	-0.468959	554.556	317	f2
augu_2_1	-0.474139	536.348	318	f2
augu_2_1	-0.477846	518.207	319	f2
augu_2_1	-0.484471	500.029	320	f2
augu_2_1	-0.491349	481.814	321	f2
augu_2_1	-0.496046	463.672	322	f2
augu_2_1	-0.502789	445.456	323	f2
augu_2_1	-0.510228	427.25	324	f2
augu_2_1	-0.516283	409.11	325	f2
[truncated: 4,769 more rows]
